# Supplementary material for: Visible-light-induced tandem difluoroalkylated spirocyclization of N-arylpropiolamides: access to C3-difluoroacetylated spiro[4,5]trienones
Source: Royal Society of Chemistry journal article supplement (doi:10.1039/d2nj00131d), 2022-01-01
Supplement: d2nj00131d1.pdf [file d2nj00131d1.pdf]

# Supporting Information

## Visible-Light-Induced Tandem Difluoroalkylated Spirocyclization of *N*-arylpropiolamides: Access to C3-Difluoroacetylated Spiro[4,5]trienones

Jin-Wei Yuan,<sup>a,\*</sup> Lu Shen,<sup>a</sup> Meng-Yao Ma,<sup>a</sup> Shi Feng,<sup>a</sup> Wan Yang,<sup>a</sup> Liang-Ru Yang,<sup>a,\*</sup> Yong-Mei

Xiao,<sup>a</sup> Shou-Ren Zhang,<sup>b,\*</sup> Ling-Bo Qu<sup>c</sup>

<sup>a</sup> School of Chemistry & Chemical Engineering, Henan University of Technology, Zhengzhou 450001, P. R. China

<sup>b</sup> Henan Key Laboratory of Nanocomposites and Applications; Institute of Nanostructured Functional Materials, Huanghe Science and Technology College, Zhengzhou 450006, P. R. China

<sup>c</sup> College of Chemistry, Zhengzhou University, Zhengzhou 450001, P. R. China

**\*Corresponding authors:**

**E-mail:** [yuanjinweigs@126.com](mailto:yuanjinweigs@126.com) (Jinwei Yuan)

---

### Contents

|                                                                                         |     |
|-----------------------------------------------------------------------------------------|-----|
| 1 General information .....                                                             | S1  |
| 2 Screening the reaction conditions .....                                               | S1  |
| 3 Luminescence quenching study.....                                                     | S2  |
| 4 Copies of spectra of products.....                                                    | S3  |
| 5 <sup>19</sup> F NMR spectrum of TEMPO-CF <sub>2</sub> CO <sub>2</sub> Et adduct ..... | S58 |
| 6 HR MS of BHT-CF <sub>2</sub> CO <sub>2</sub> Et adduct.....                           | S58 |

## 1 General information

All chemicals were commercially available and used as received without further. Column chromatography was performed using 300-400 mesh silica. Nuclear magnetic resonance spectra were recorded on Bruker Avance 400 MHz spectrometer.  $^1\text{H}$  NMR spectra are recorded in parts per million from tetramethylsilane. Data were reported as follows: chemical shift, multiplicity (s = singlet, d = doublet, t = triplet, m = multiplet and br = broad), coupling constant in Hz and integration.  $^{13}\text{C}$  NMR spectra were recorded in parts per million from tetramethylsilane.  $^{19}\text{F}$  NMR spectra were recorded in parts per million with fluorobenzene as external standard. High resolution mass spectra (HR MS) were obtained on Thermo Scientific LTQ Orbitrap XL instrument using the ESI technique. IR spectra were recorded on WQF-510 Fourier transform infrared spectrophotometer. Melting points were measured on an XT4A microscopic apparatus uncorrected.

## 2 Screening the reaction conditions

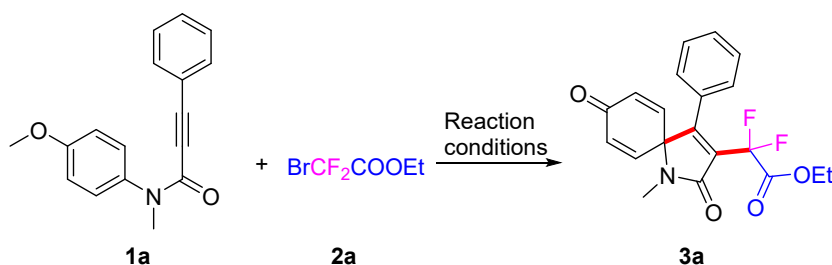

**Table S1** Screening the molar ratio of **1a** and **2a**<sup>a</sup>

| Entry | the molar ratio of <b>1a</b> and <b>2a</b> | Yields (%) <sup>b</sup> |
|-------|--------------------------------------------|-------------------------|
| 1     | 1 : 1                                      | 22                      |
| 2     | 1 : 1.5                                    | 37                      |
| 3     | 1 : 2                                      | 44                      |
| 4     | 1 : 2.5                                    | 50                      |
| 5     | 1 : 3                                      | 56                      |
| 6     | 1 : 3.5                                    | 55                      |

<sup>a</sup> Reaction conditions: *N*-(4-methoxyphenyl)-*N*-methyl-3-phenylpropiolamide **1a** (0.2 mmol, 53.0 mg), ethyl 2-

bromo-2,2-difluoroacetate **2a**, *fac*-[Ir(ppy)] (0.002 mmol, 1.31 mg), K<sub>3</sub>PO<sub>4</sub> (0.3 mmol, 63.6 mg) and DMF (2.0 mL), 5 W blue LEDs at room temperature under N<sub>2</sub> atmosphere for 4.5 h.

<sup>b</sup> Isolated yield.

### 3 Luminescence quenching study

Emission intensities were recorded using a F-7000 FL Spectrophotometer. First, the emission intensity of fluorescein solutions was observed at 369 nm. The solutions were irradiated at 510 nm (Maximum absorption wavelength of fluorescein) and fluorescence was measured from 450 nm to 650 nm. In a typical experiment, the emission spectrum of a  $1 \times 10^{-4}$  M solution of fluorescein with different concentration of **2a** in degassed anhydrous CH<sub>2</sub>Cl<sub>2</sub> and the linear relationship between  $I_0/I$  and the increasing concentration of **2a** from 0 M to  $5.0 \times 10^{-2}$  M.

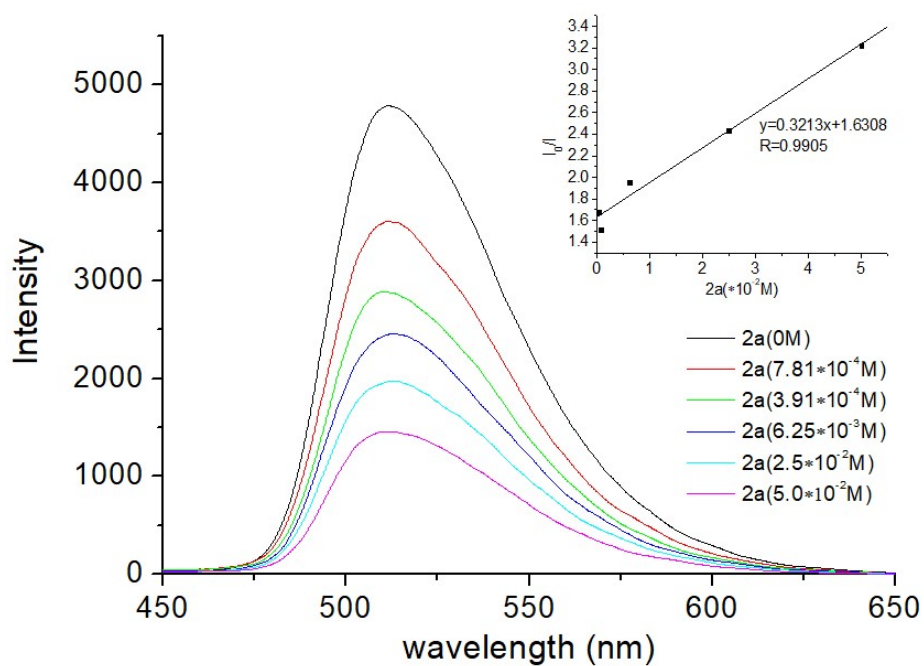

**Figure 1** Luminescence quenching study

## 4 Copies of spectra of products

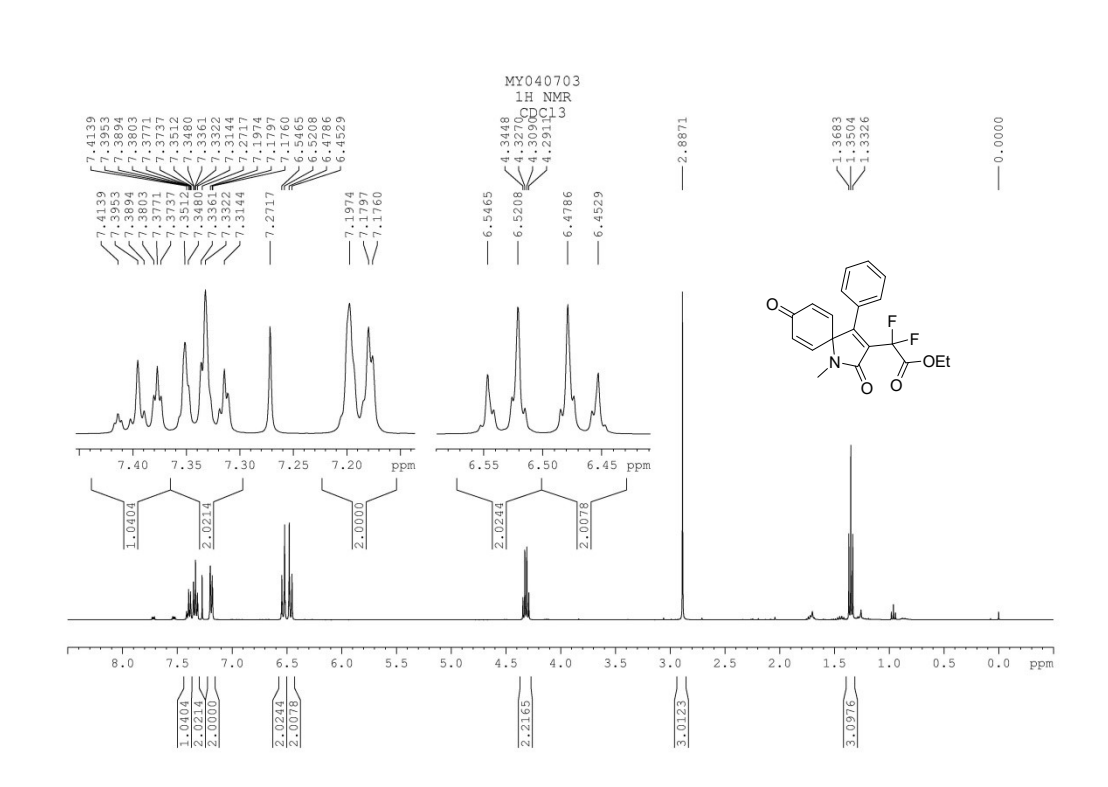

Fig. 2 <sup>1</sup>H NMR spectrum of compound 3a

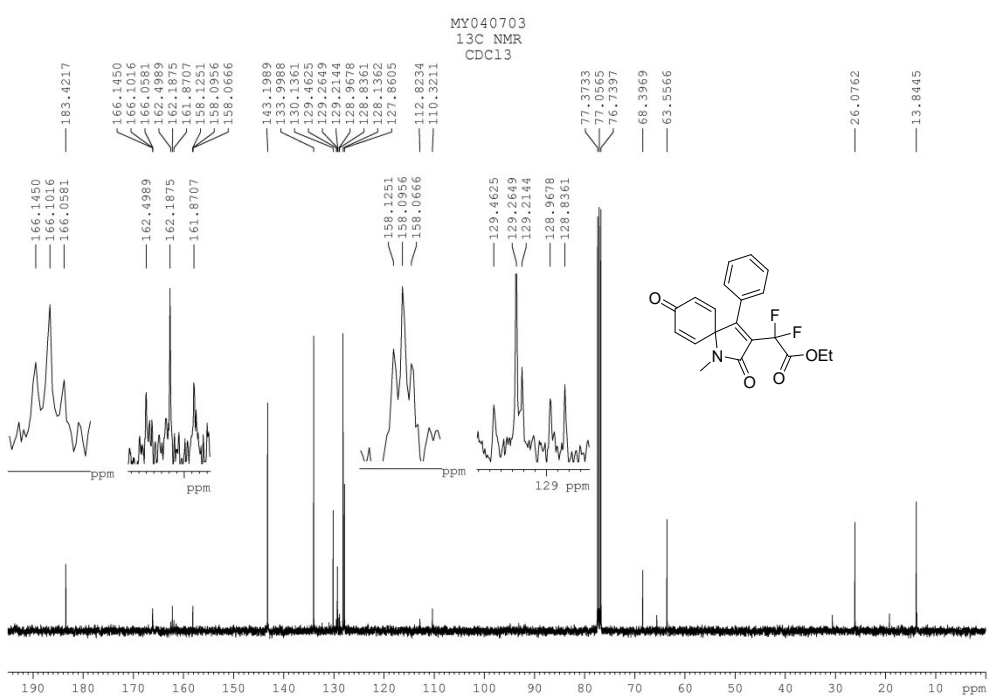

Fig. 3 <sup>13</sup>C NMR spectrum of compound 3a

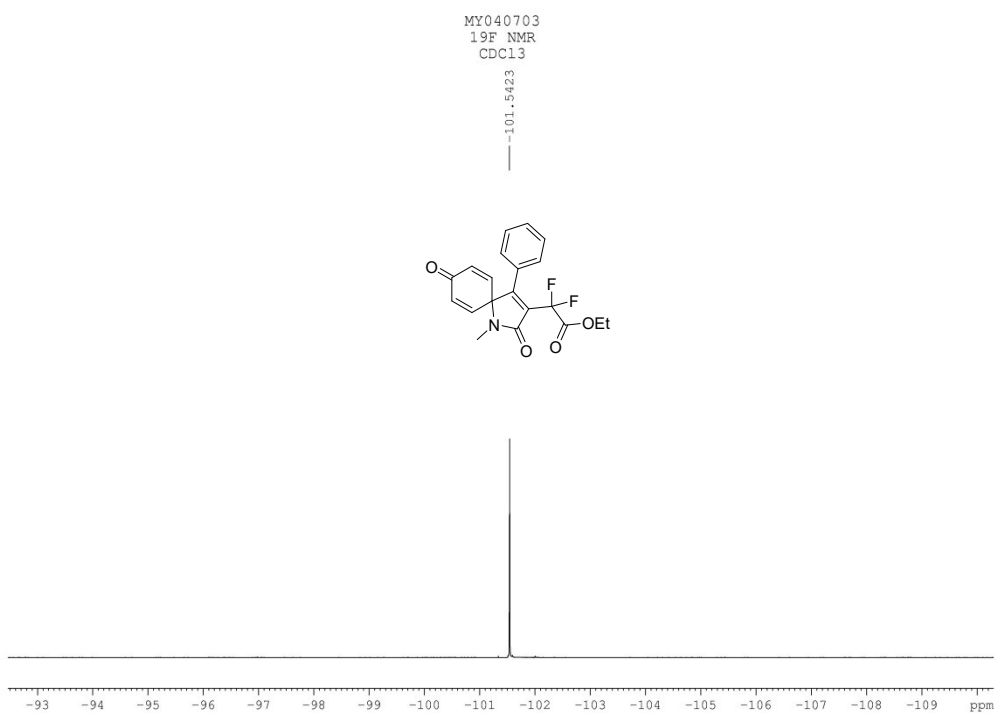

Fig. 4 <sup>19</sup>F NMR spectrum of compound 3a

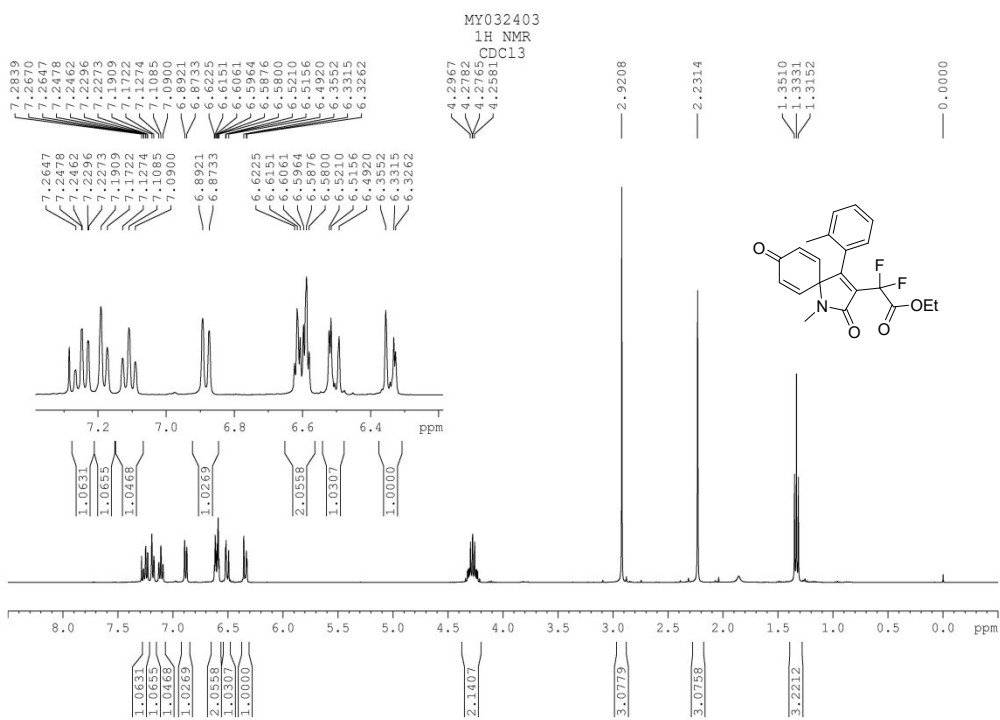

Fig. 5 <sup>1</sup>H NMR spectrum of compound 3b

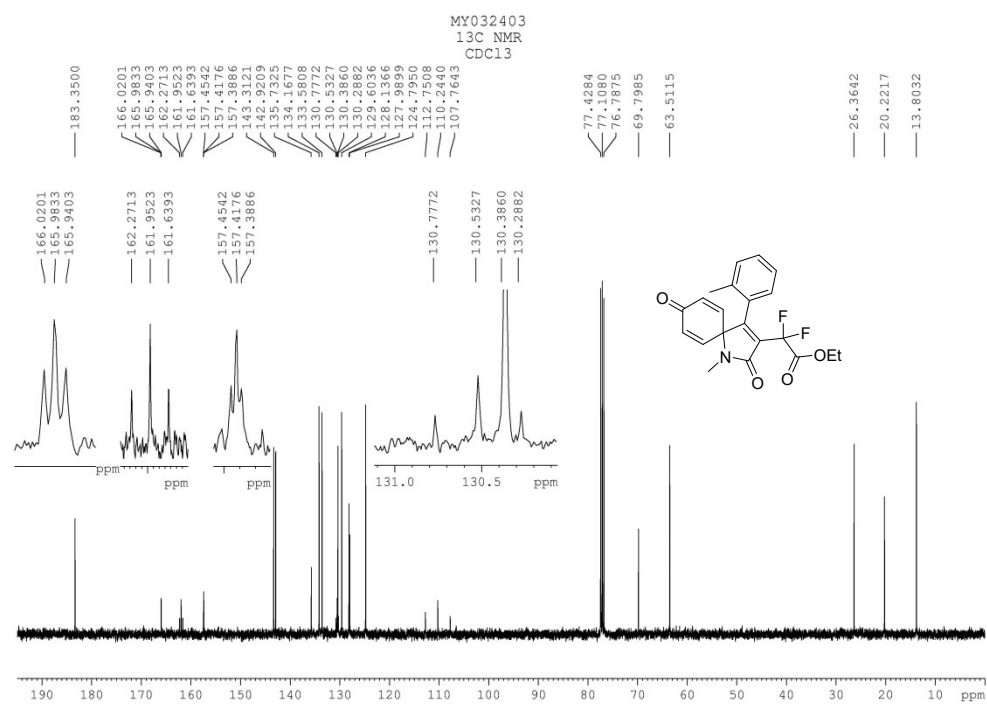

Fig. 6 <sup>13</sup>C NMR spectrum of compound 3b

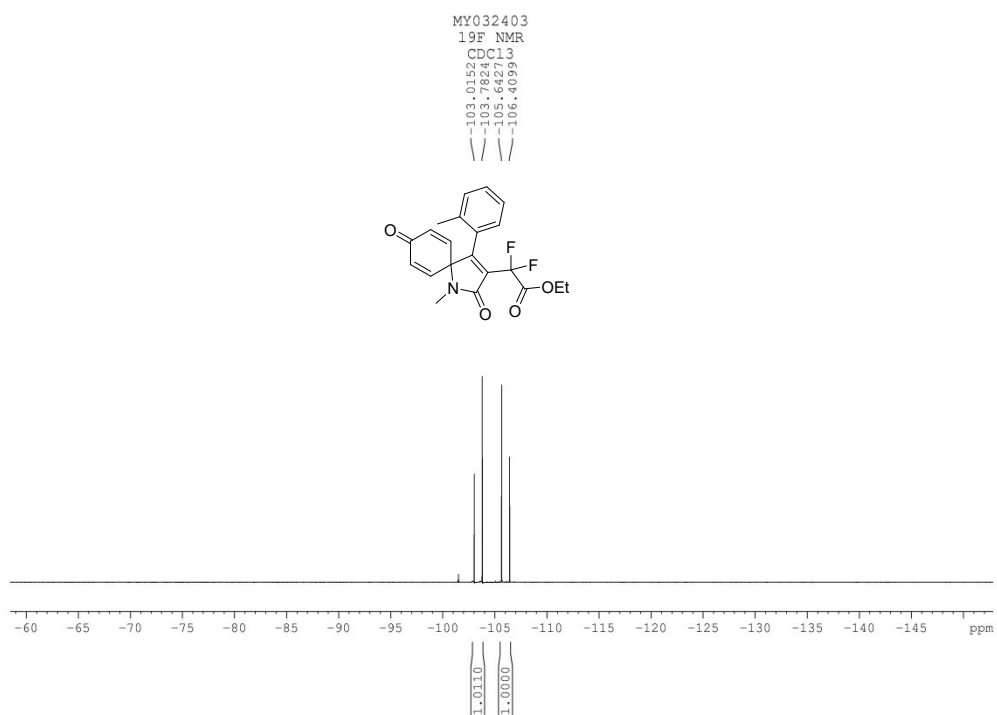

Fig. 7 <sup>19</sup>F NMR spectrum of compound 3b

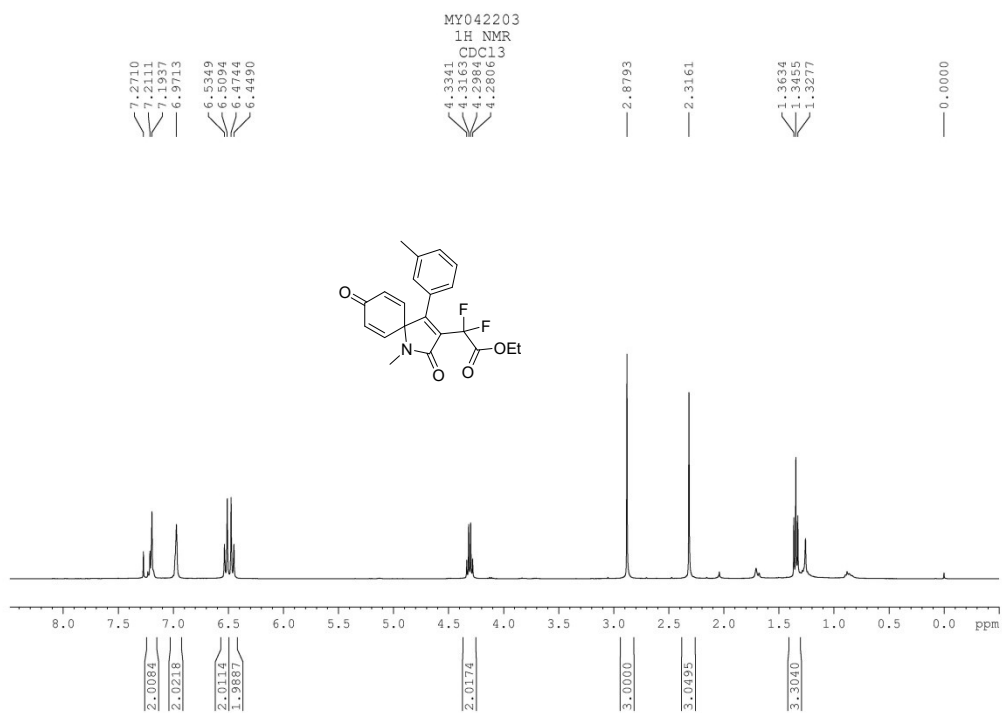

Fig. 8 <sup>1</sup>H NMR spectrum of compound 3c

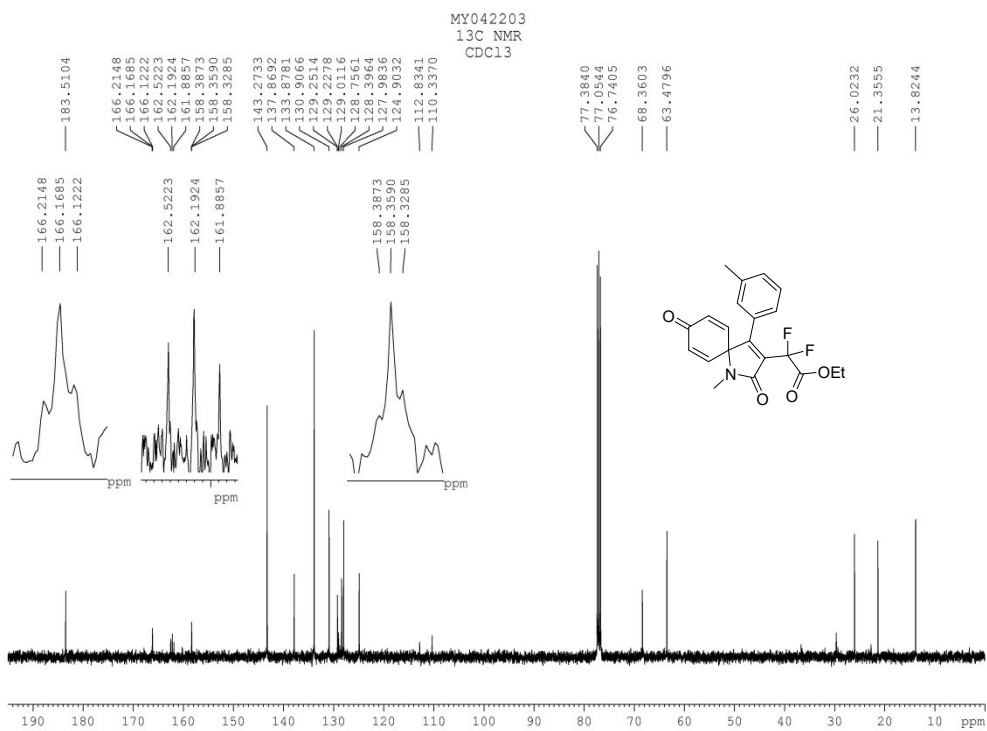

Fig. 9 <sup>13</sup>C NMR spectrum of compound 3c

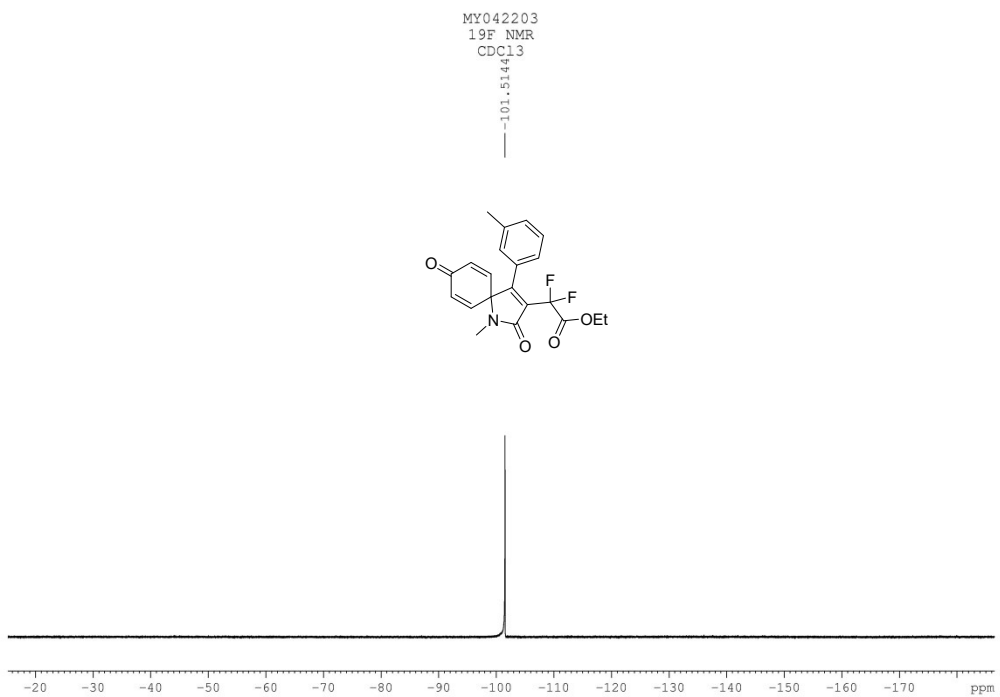

Fig. 10 <sup>19</sup>F NMR spectrum of compound 3c

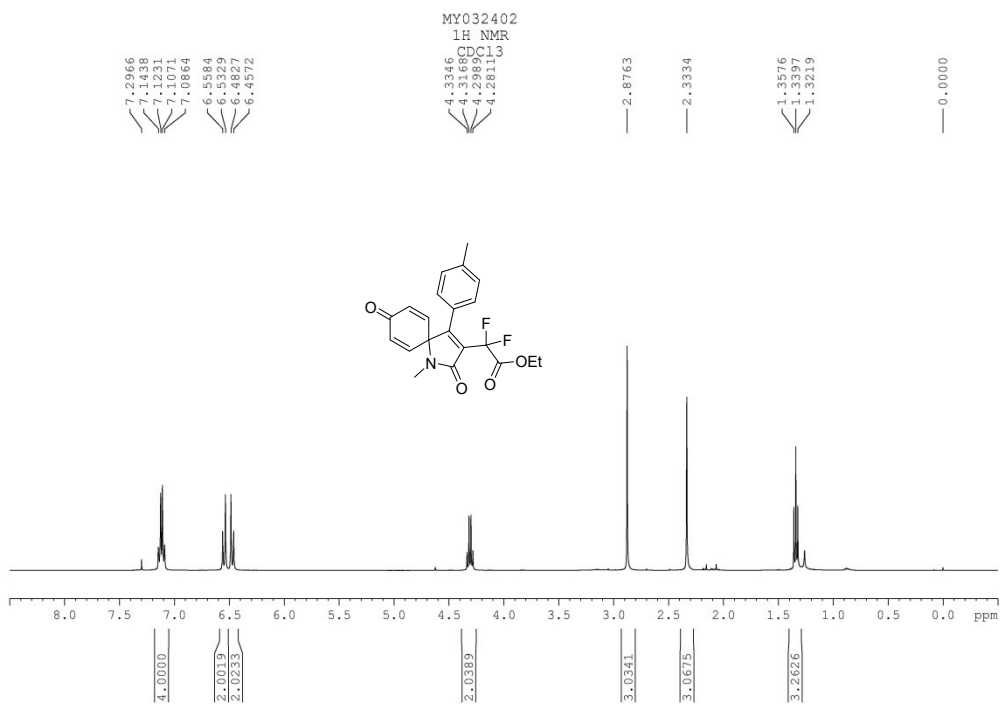

Fig. 11 <sup>1</sup>H NMR spectrum of compound 3d



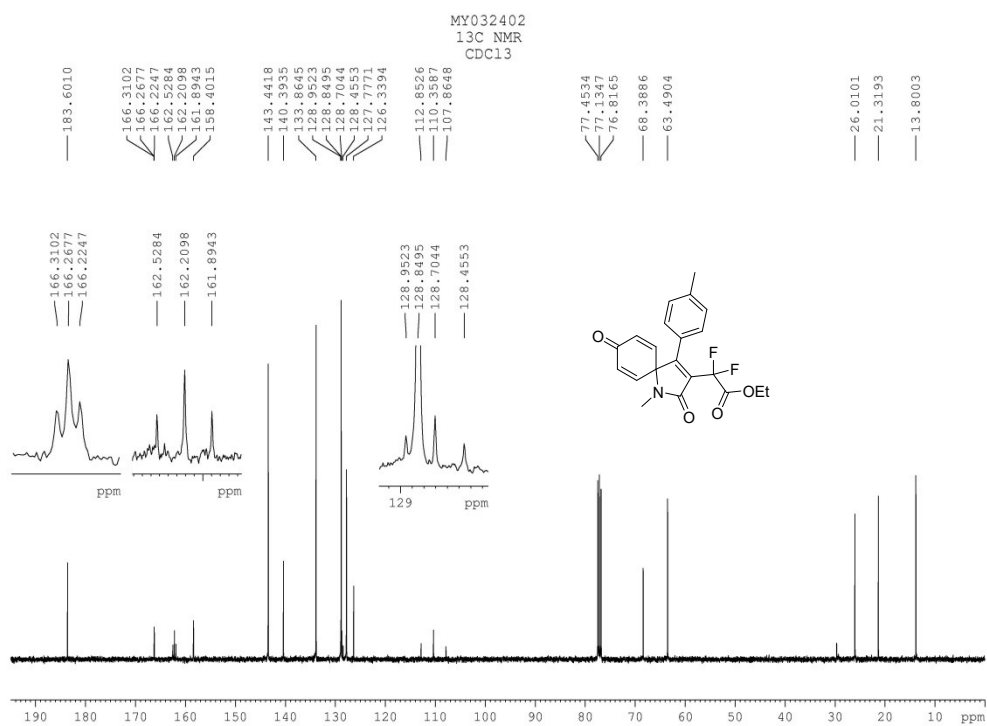

**Fig. 12**  $^{13}\text{C}$  NMR spectrum of compound **3d**

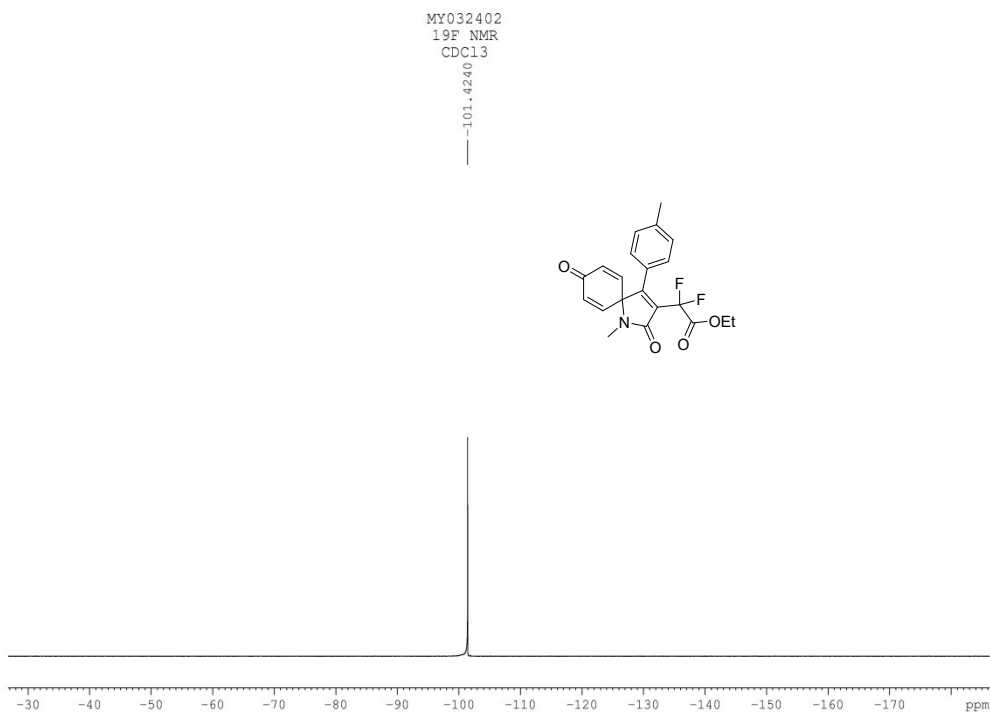

**Fig. 13**  $^{19}\text{F}$  NMR spectrum of compound **3d**

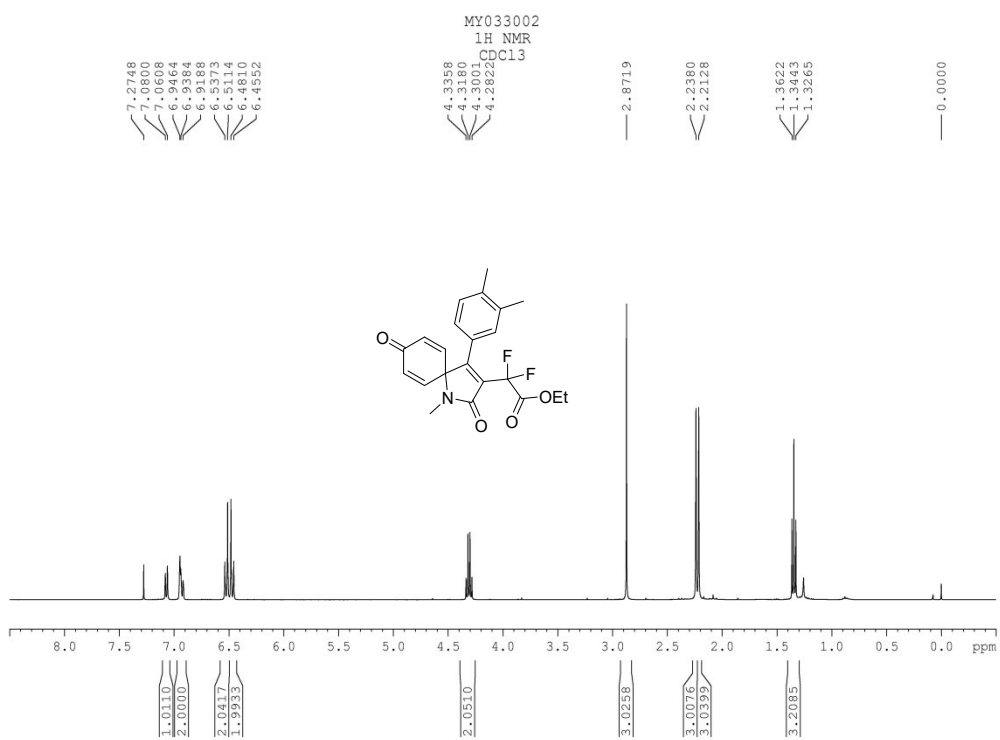

Fig. 14 <sup>1</sup>H NMR spectrum of compound 3e

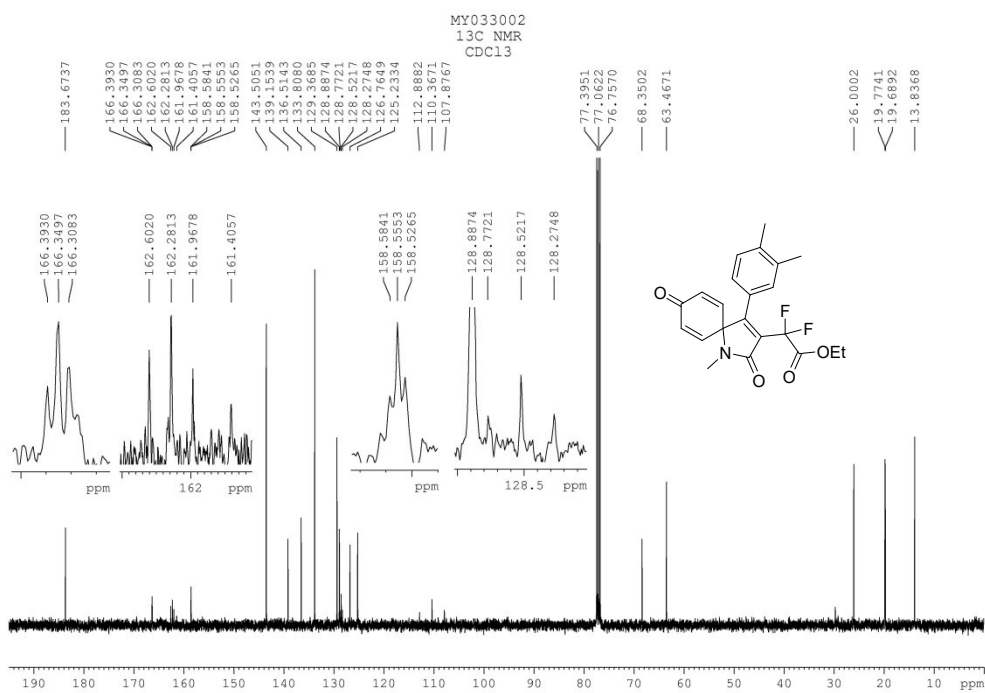

Fig. 15 <sup>13</sup>C NMR spectrum of compound 3e

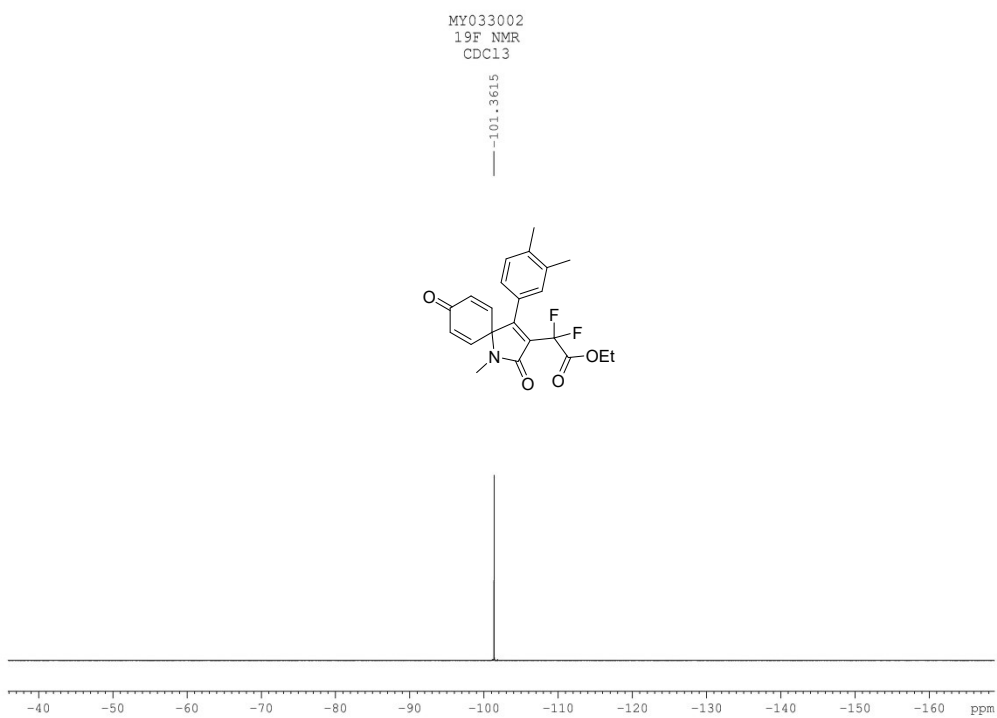

Fig. 16 <sup>19</sup>F NMR spectrum of compound 3e

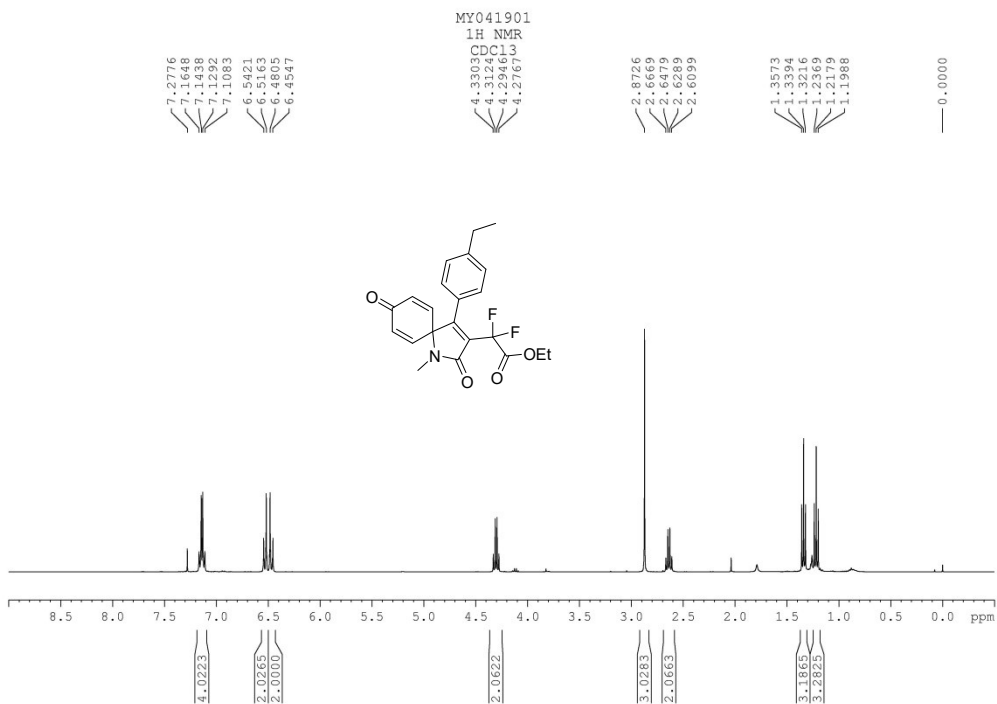

Fig. 17 <sup>1</sup>H NMR spectrum of compound 3f

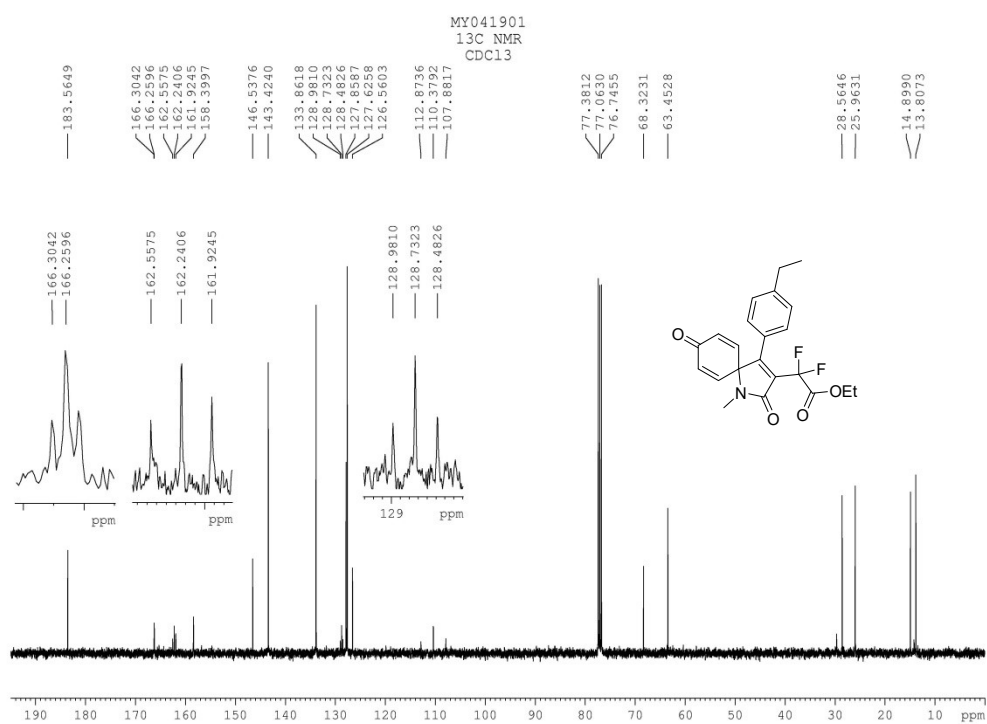

Fig. 18 <sup>13</sup>C NMR spectrum of compound 3f

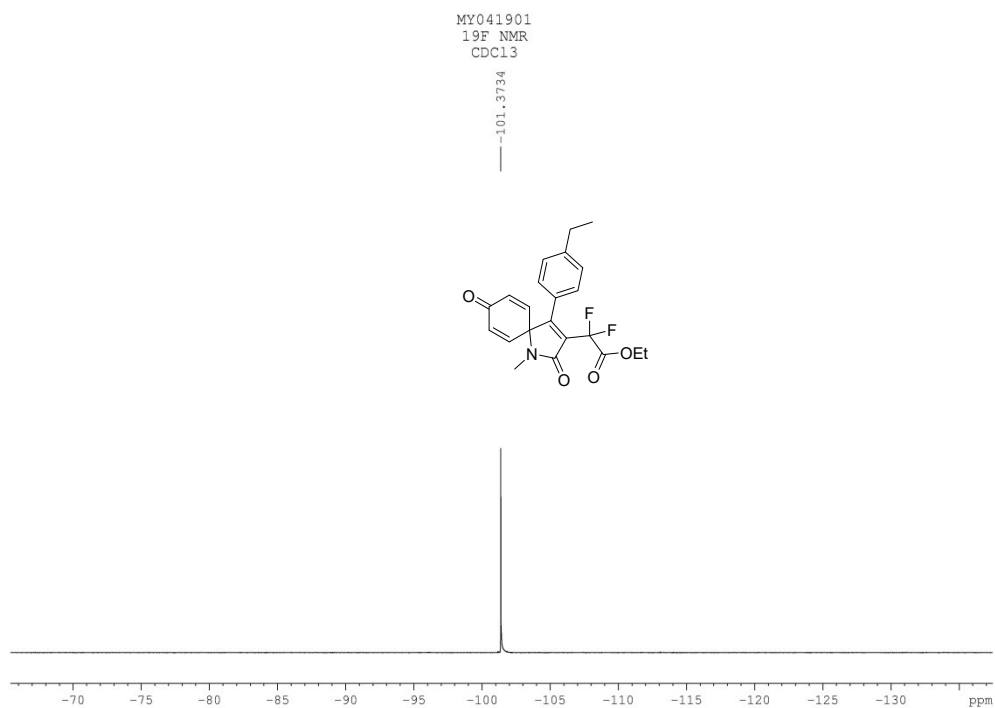

Fig. 19 <sup>19</sup>F NMR spectrum of compound 3f

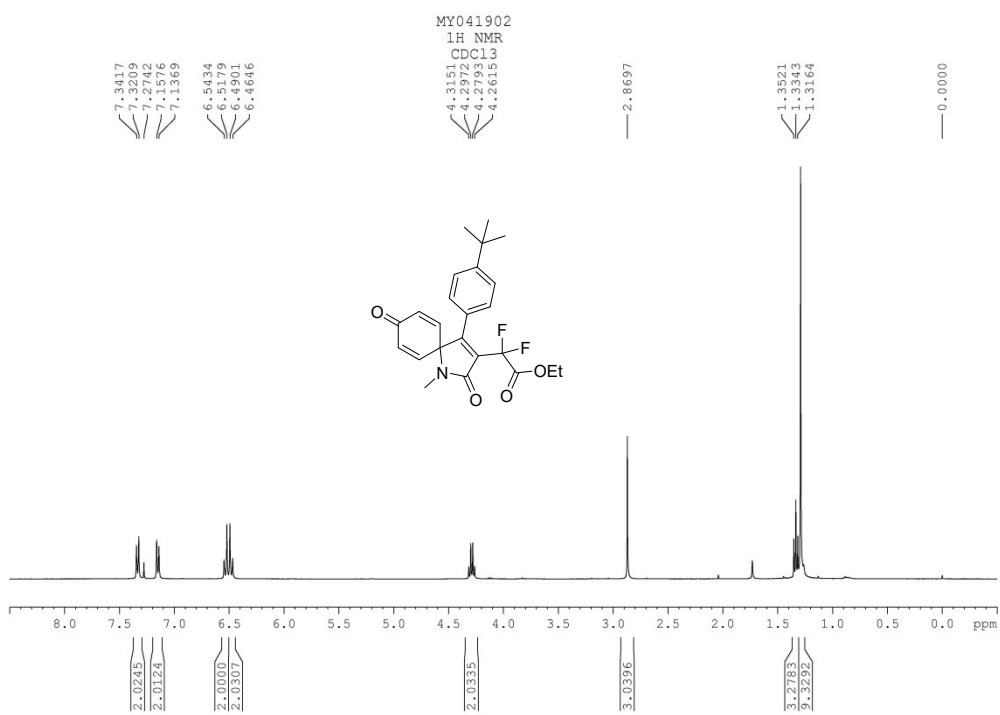

Fig. 20 <sup>1</sup>H NMR spectrum of compound **3g**

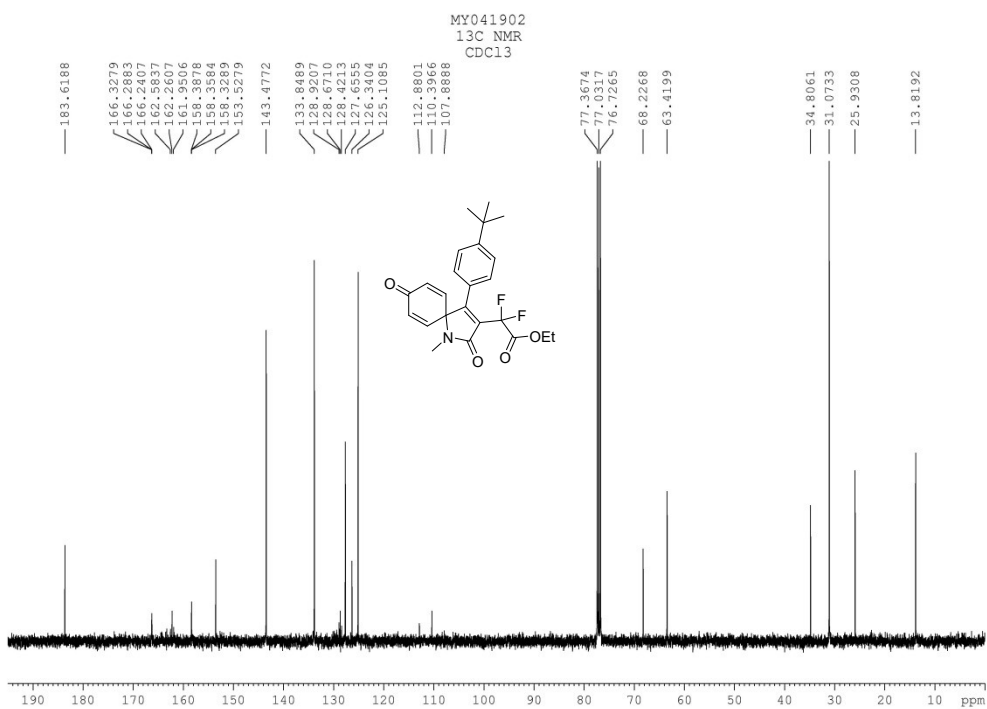

Fig. 21 <sup>13</sup>C NMR spectrum of compound **3g**

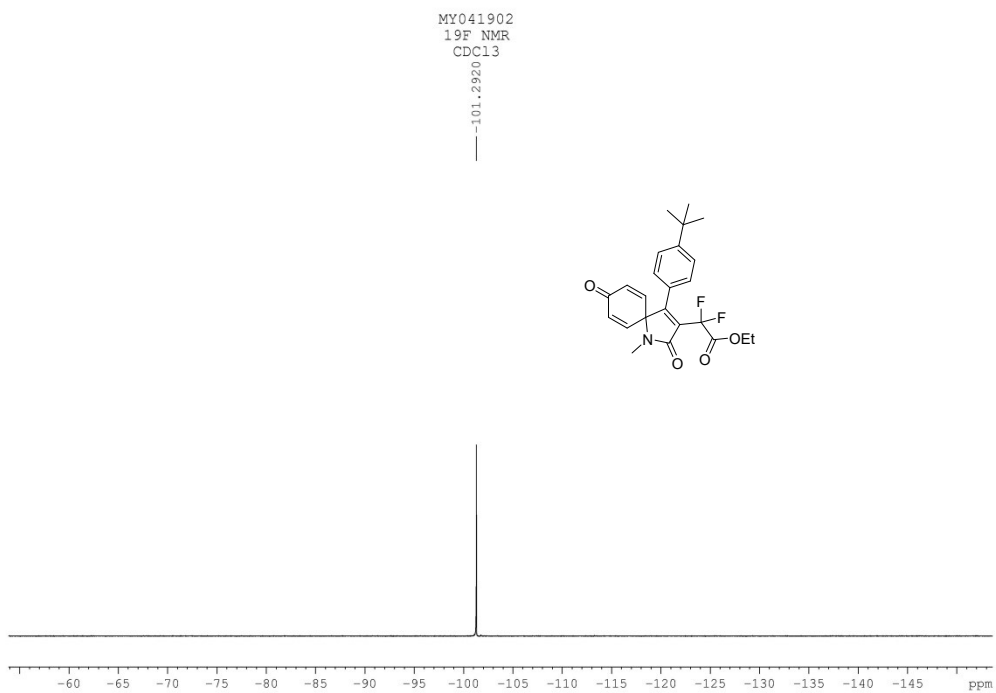

Fig. 22 <sup>19</sup>F NMR spectrum of compound 3g

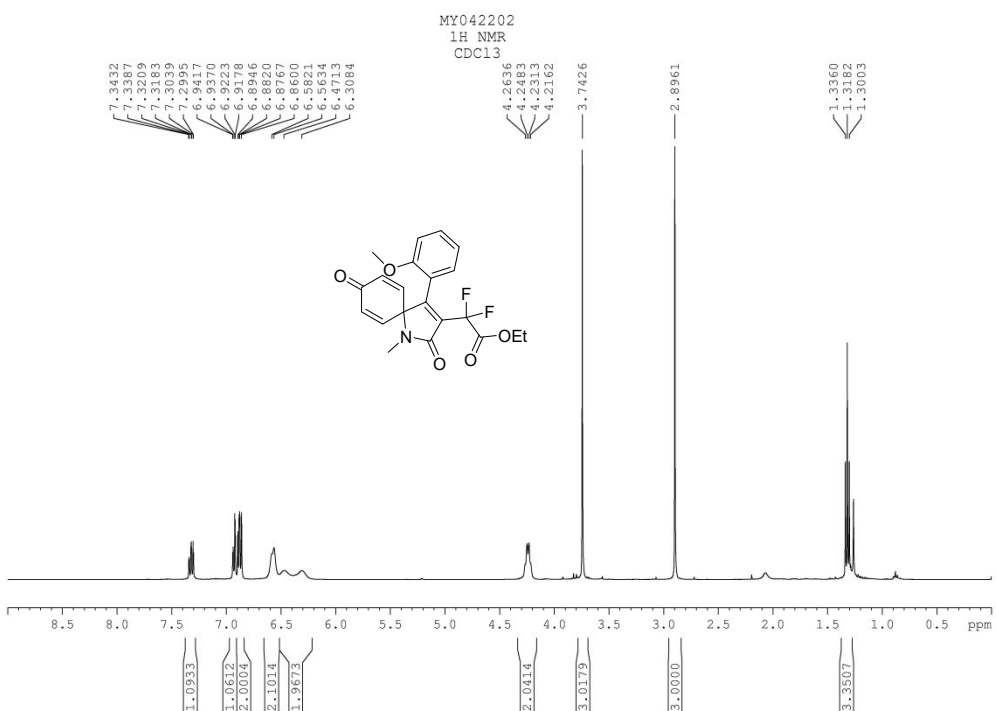

Fig. 23 <sup>1</sup>H NMR spectrum of compound 3h

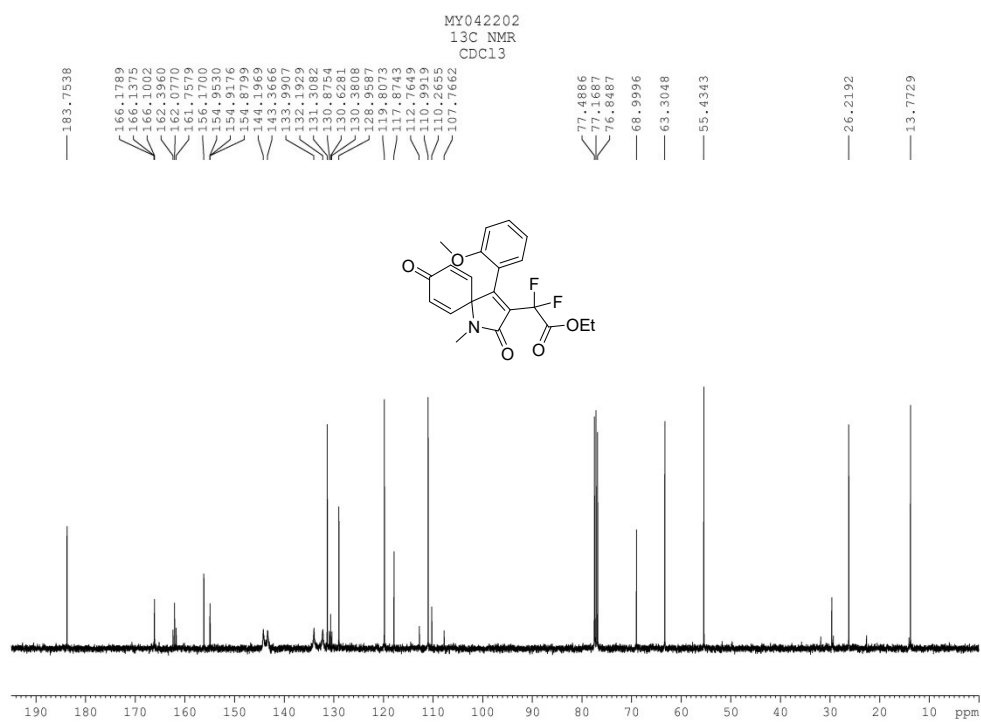

Fig. 24 <sup>13</sup>C NMR spectrum of compound 3h

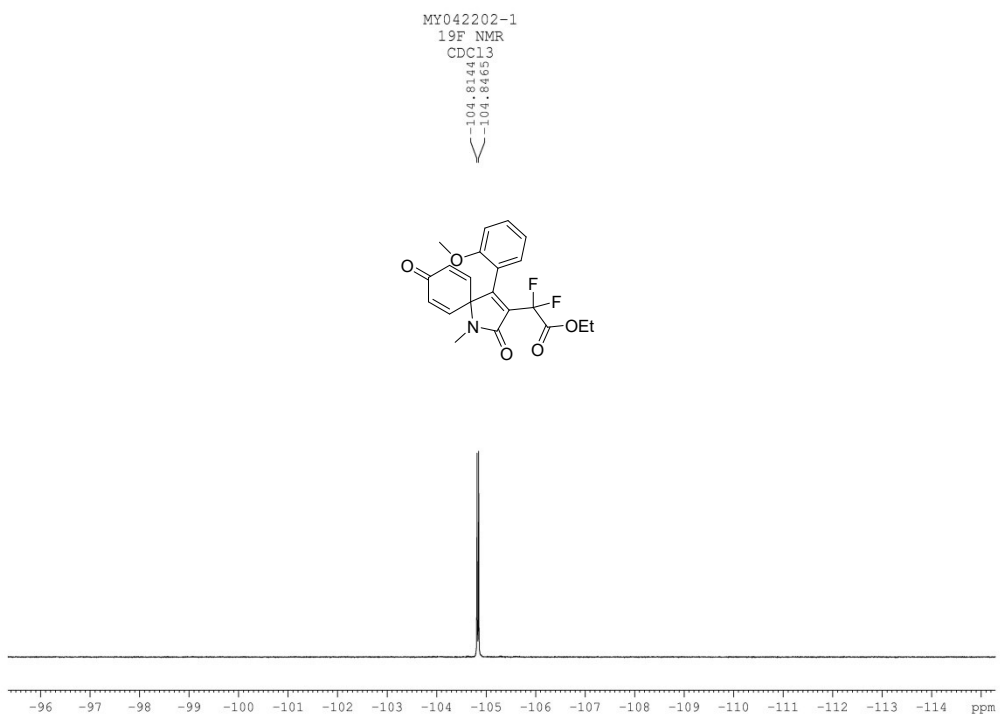

Fig. 25 <sup>19</sup>F NMR spectrum of compound 3h

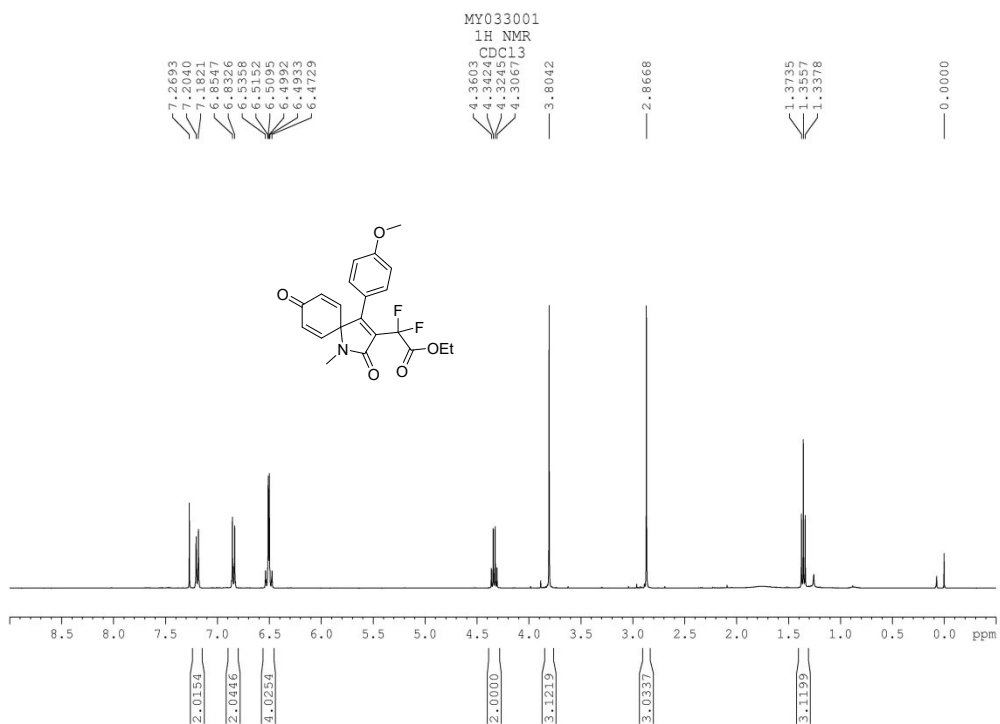

Fig. 26 <sup>1</sup>H NMR spectrum of compound **3i**

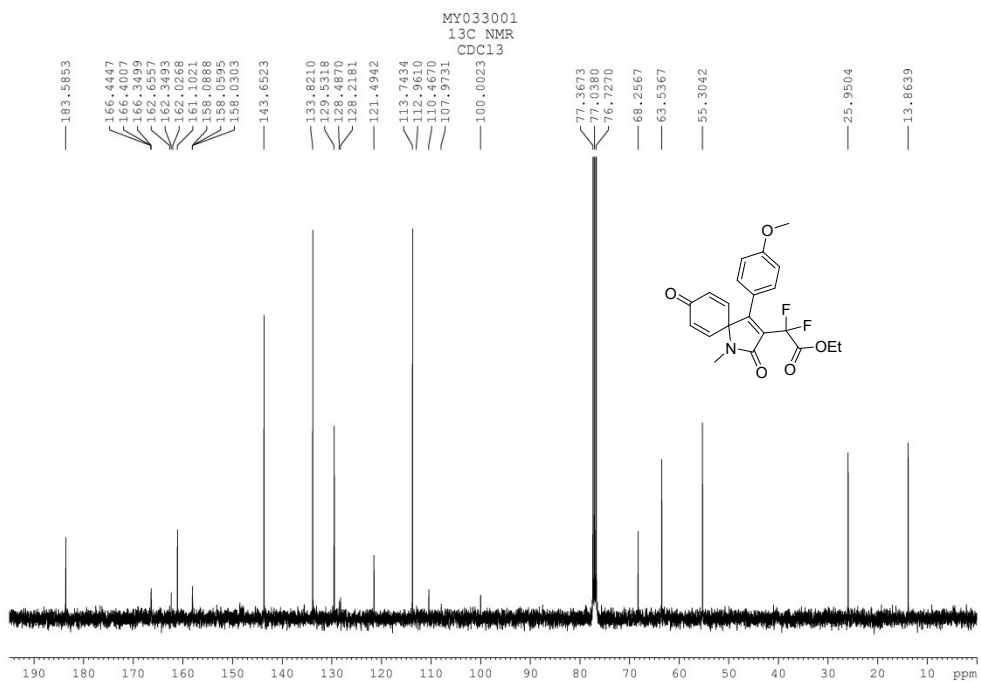

Fig. 27 <sup>13</sup>C NMR spectrum of compound **3i**



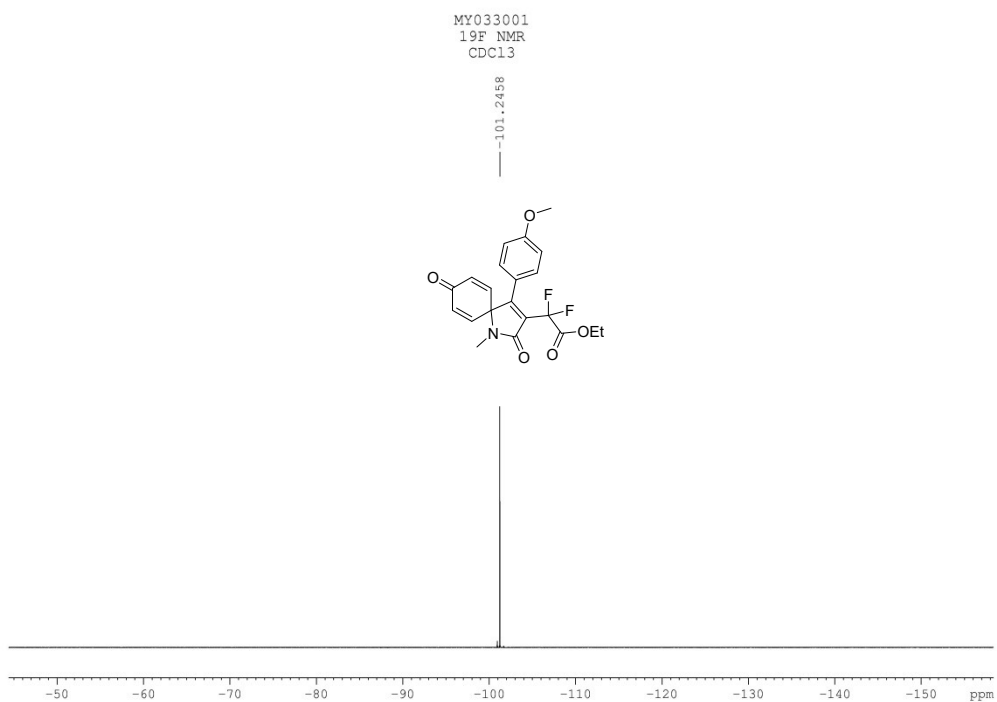

Fig. 28 <sup>19</sup>F NMR spectrum of compound 3i

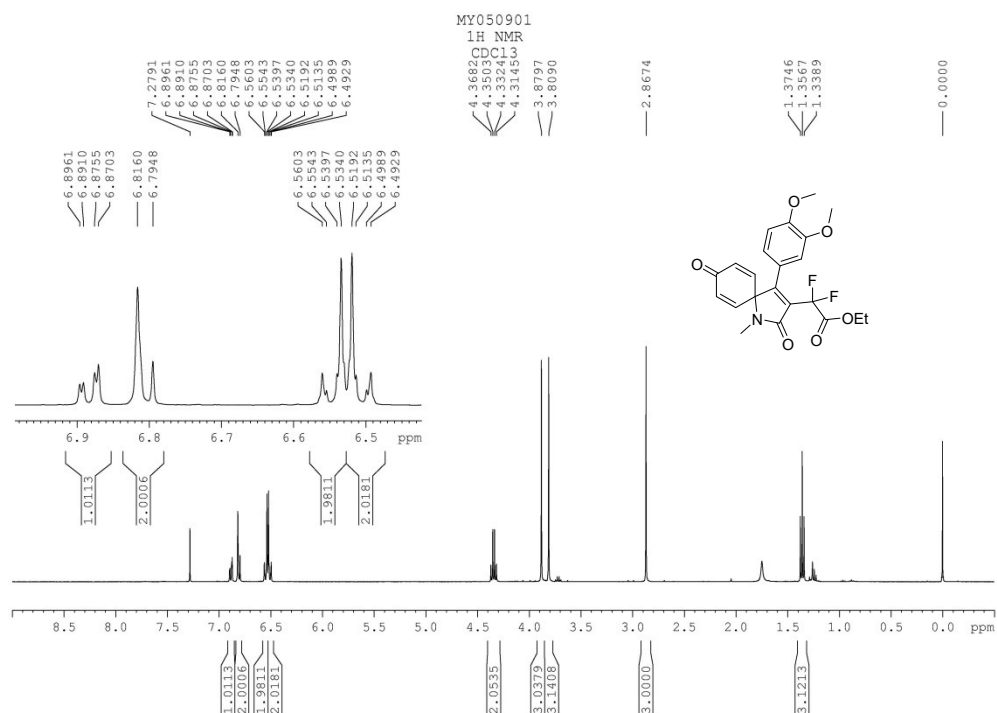

Fig. 29 <sup>1</sup>H NMR spectrum of compound 3j

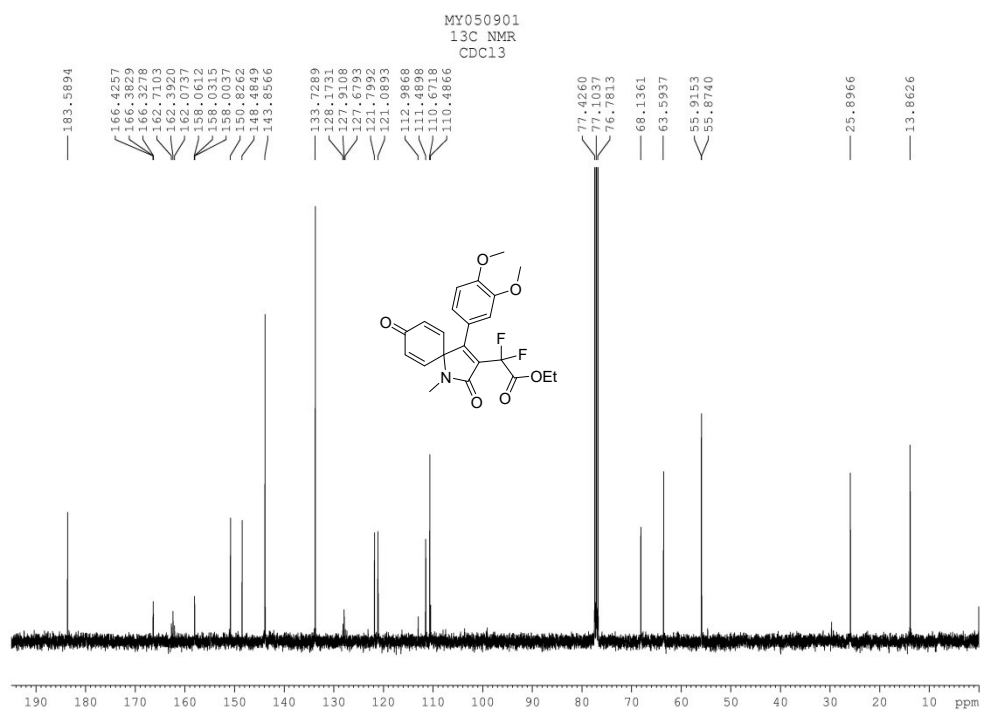

Fig. 30 <sup>13</sup>C NMR spectrum of compound 3j

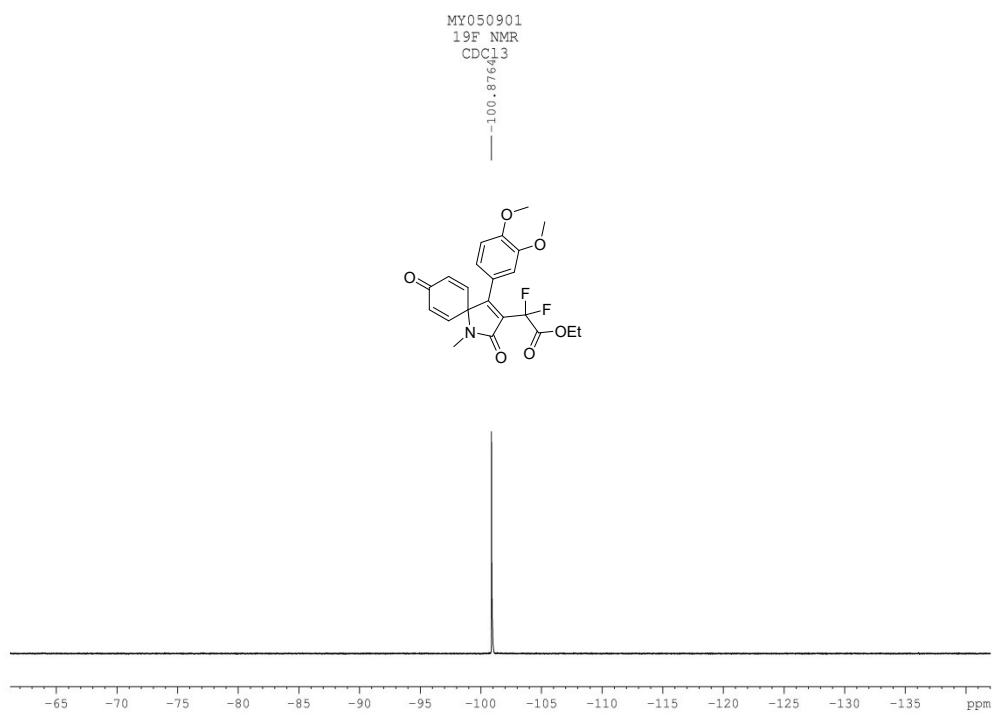

Fig. 31 <sup>19</sup>F NMR spectrum of compound 3j

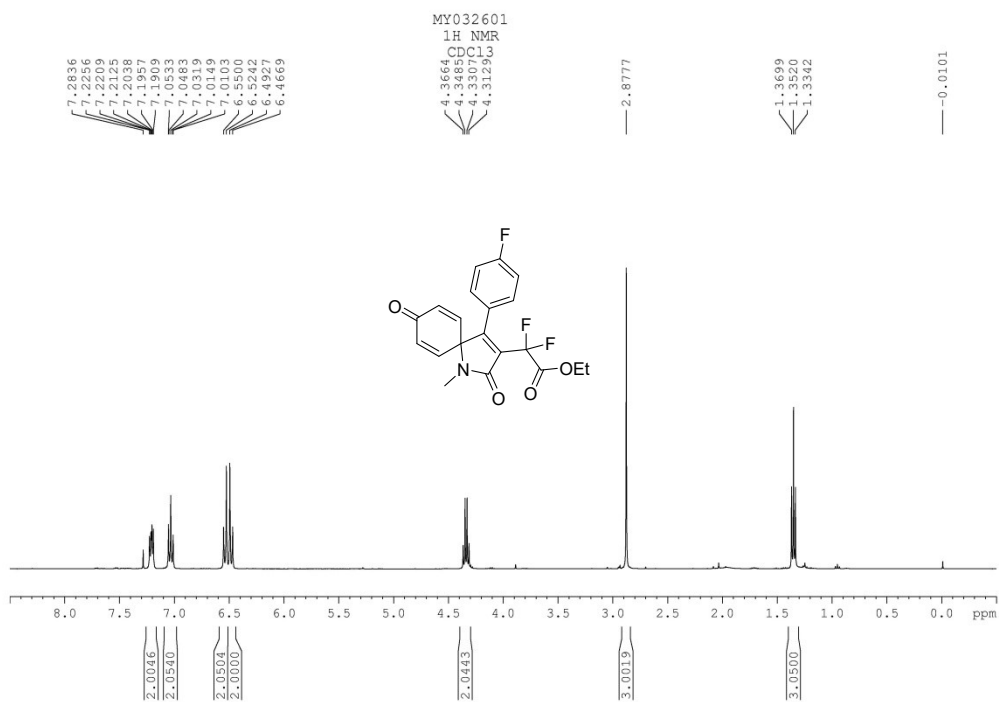

Fig. 32 <sup>1</sup>H NMR spectrum of compound 3k

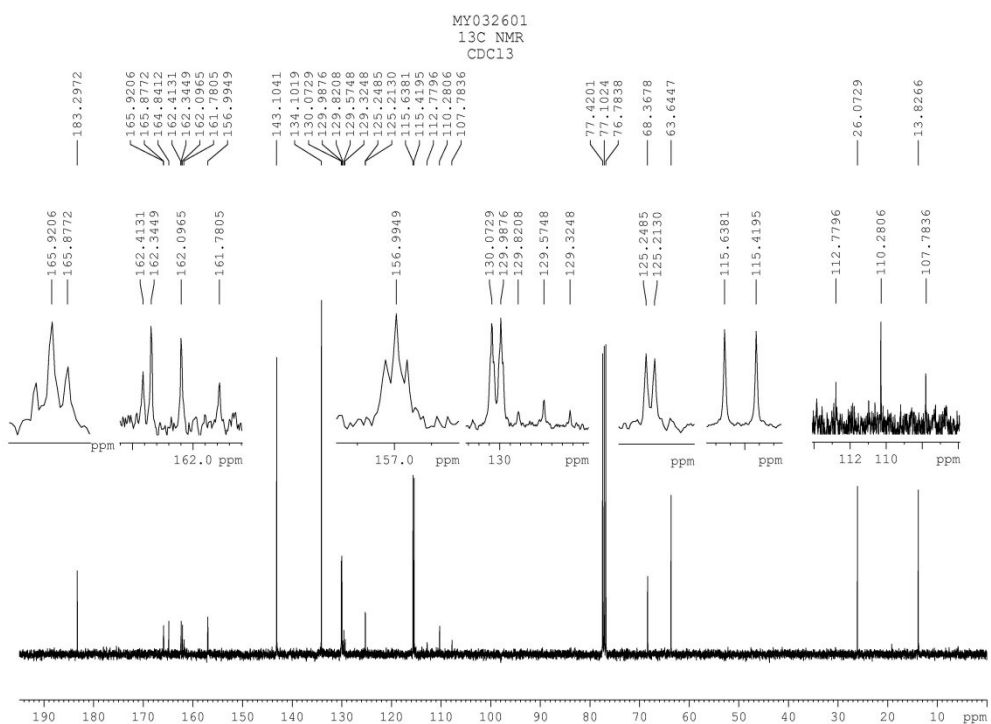

Fig. 33 <sup>13</sup>C NMR spectrum of compound 3k

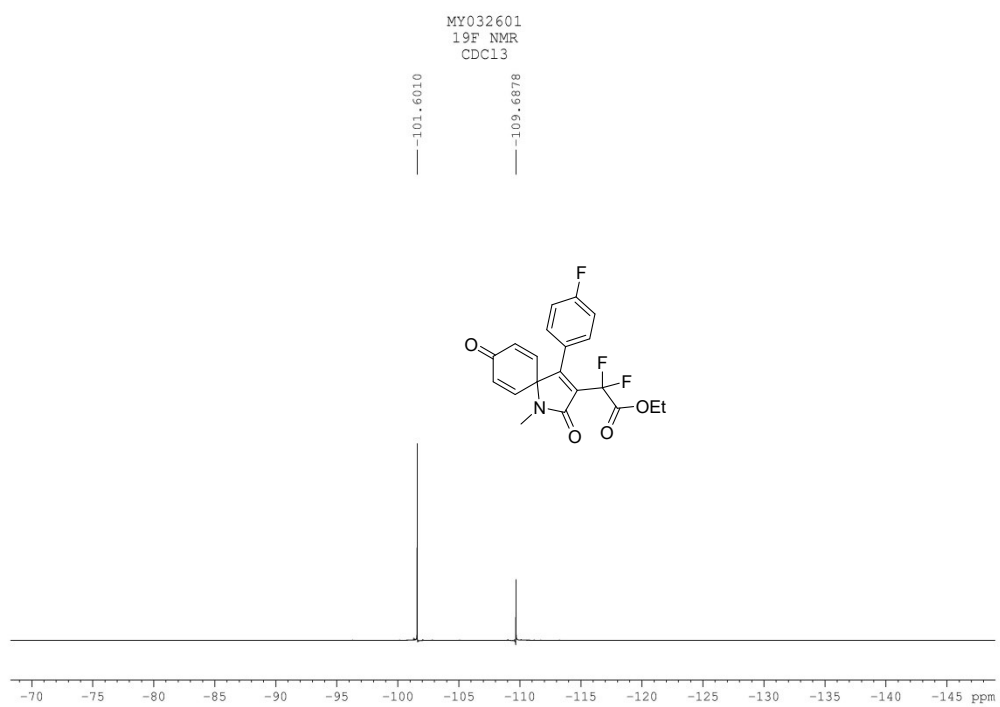

Fig. 34  $^{19}\text{F}$  NMR spectrum of compound 3k

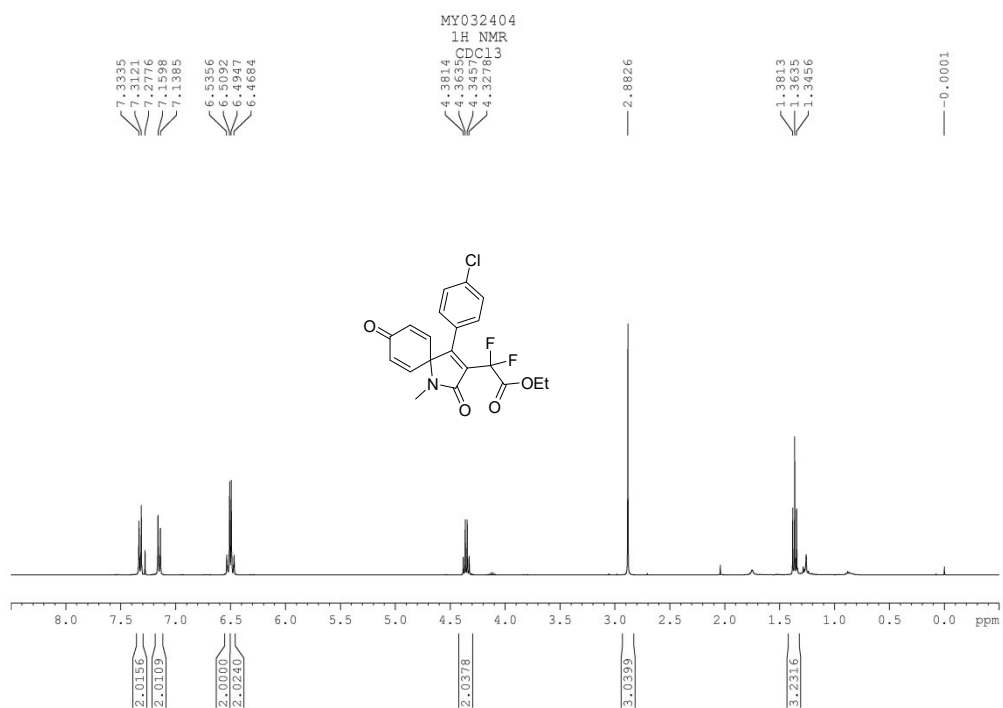

Fig. 35  $^1\text{H}$  NMR spectrum of compound 3l

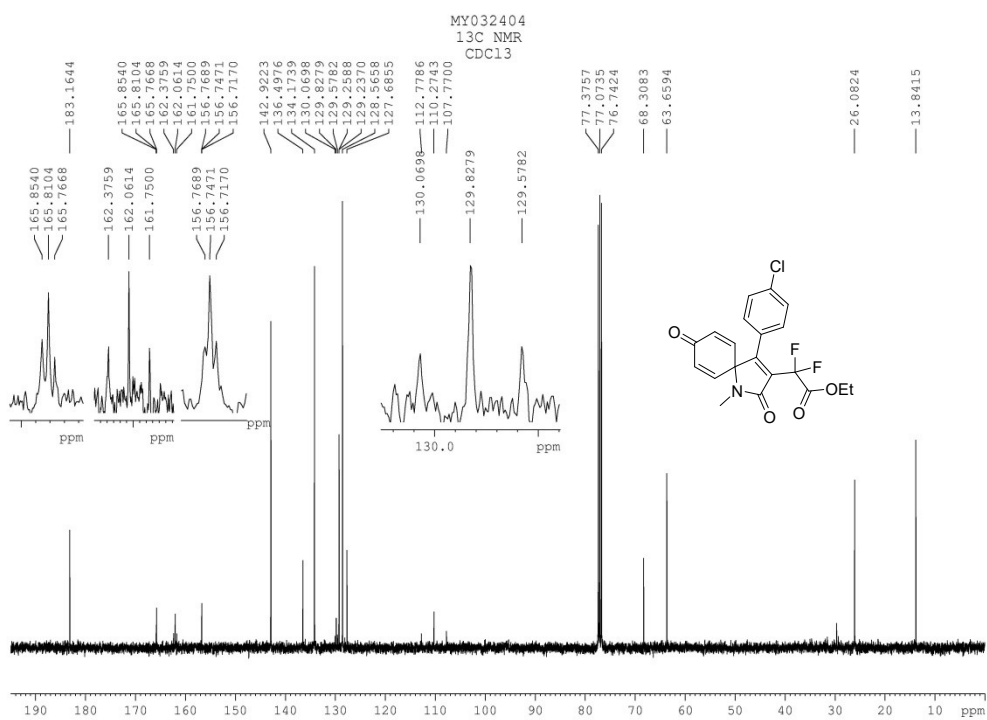

Fig. 36 <sup>13</sup>C NMR spectrum of compound 31

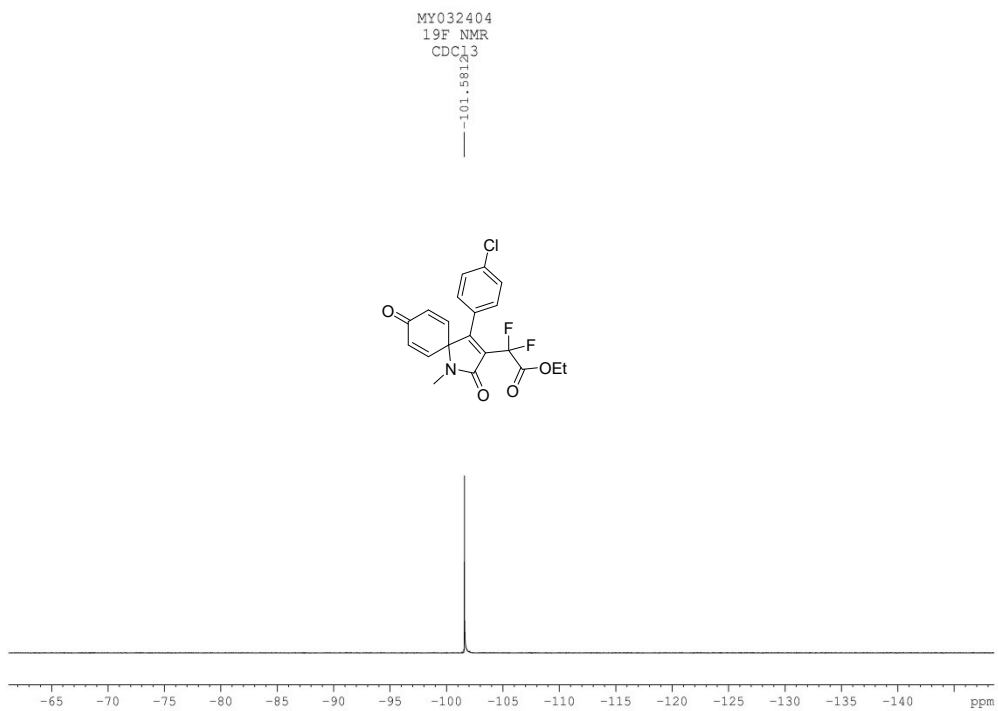

Fig. 37 <sup>19</sup>F NMR spectrum of compound 31

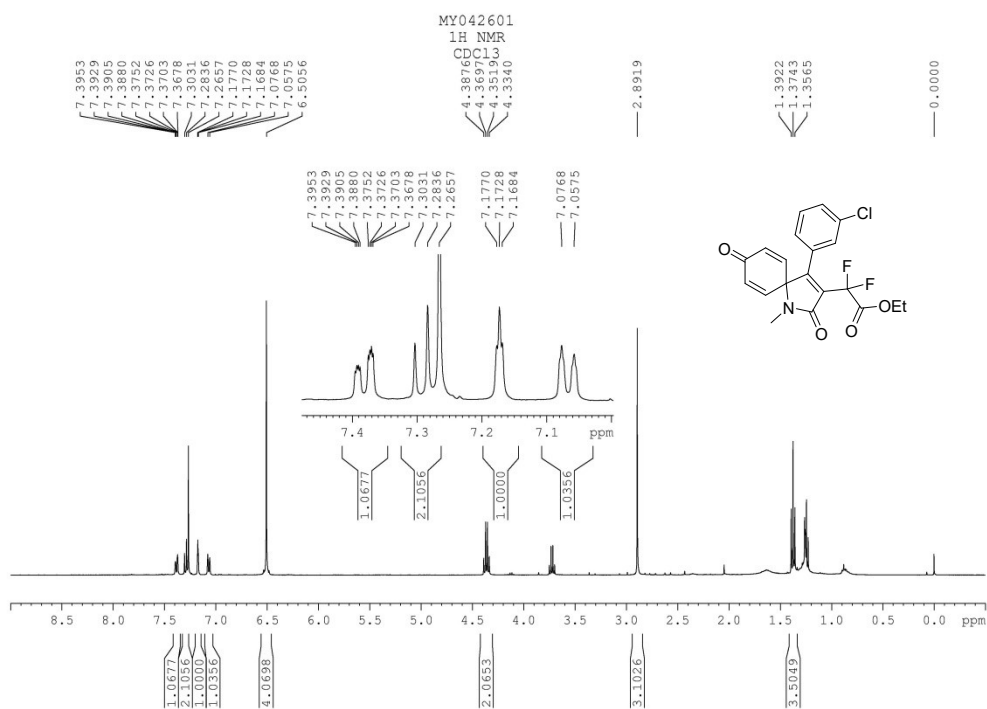

Fig. 38 <sup>1</sup>H NMR spectrum of compound 3m

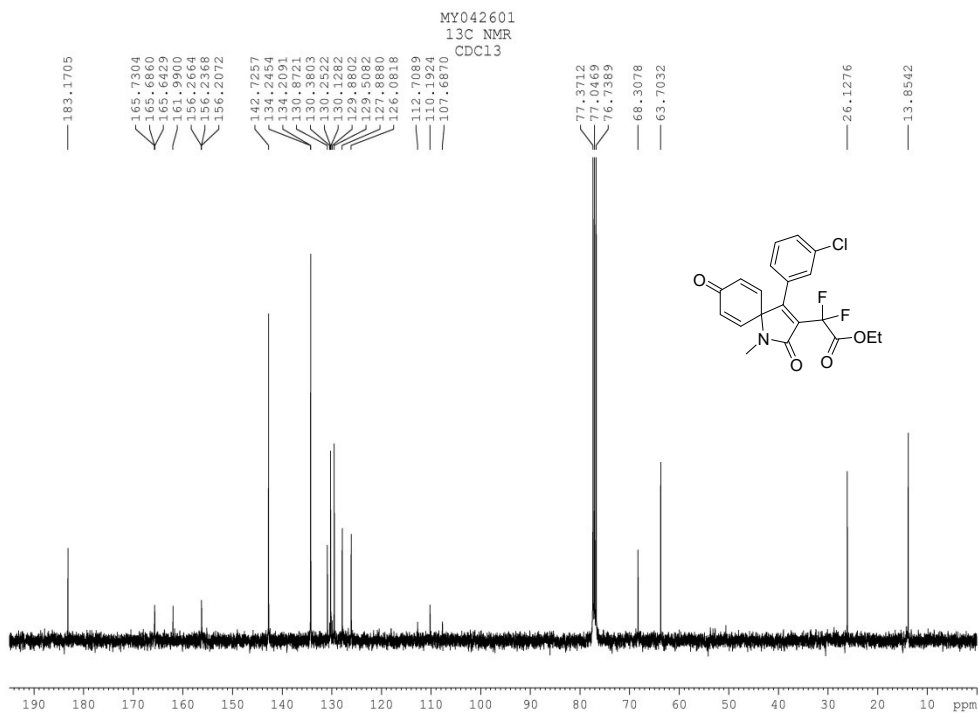

Fig. 39 <sup>13</sup>C NMR spectrum of compound 3m

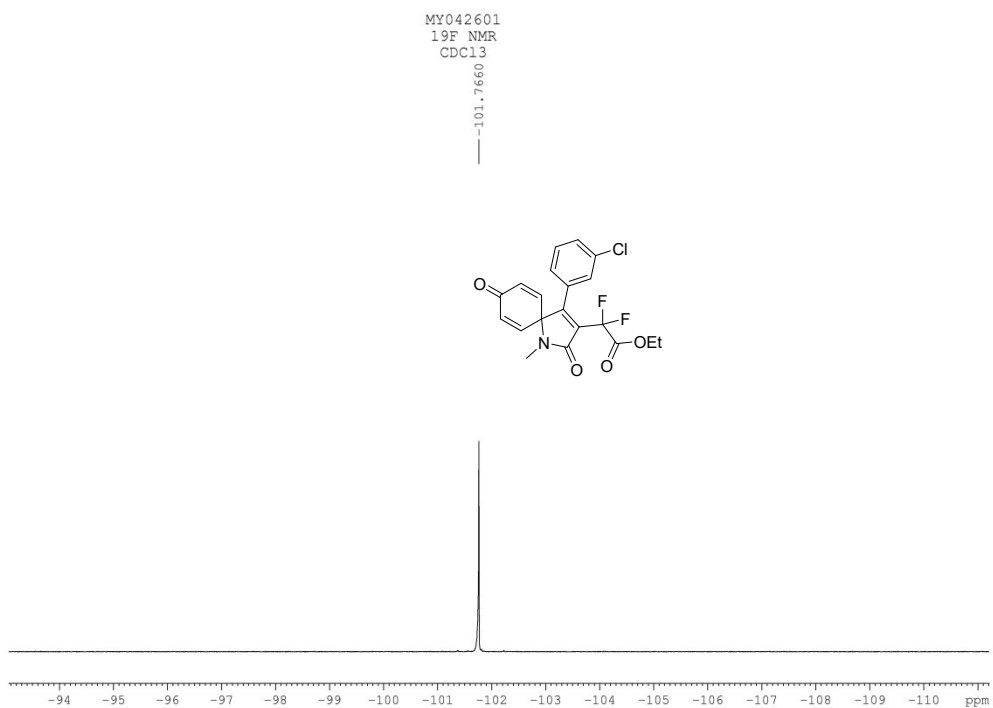

Fig. 40 <sup>19</sup>F NMR spectrum of compound 3m

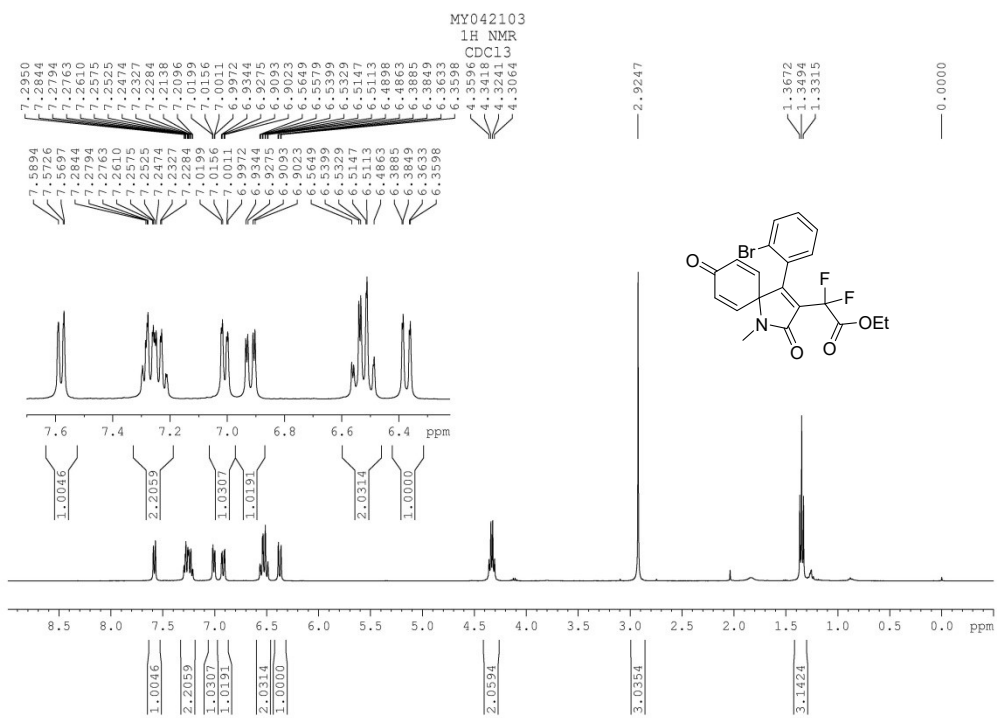

Fig. 41 <sup>1</sup>H NMR spectrum of compound 3n

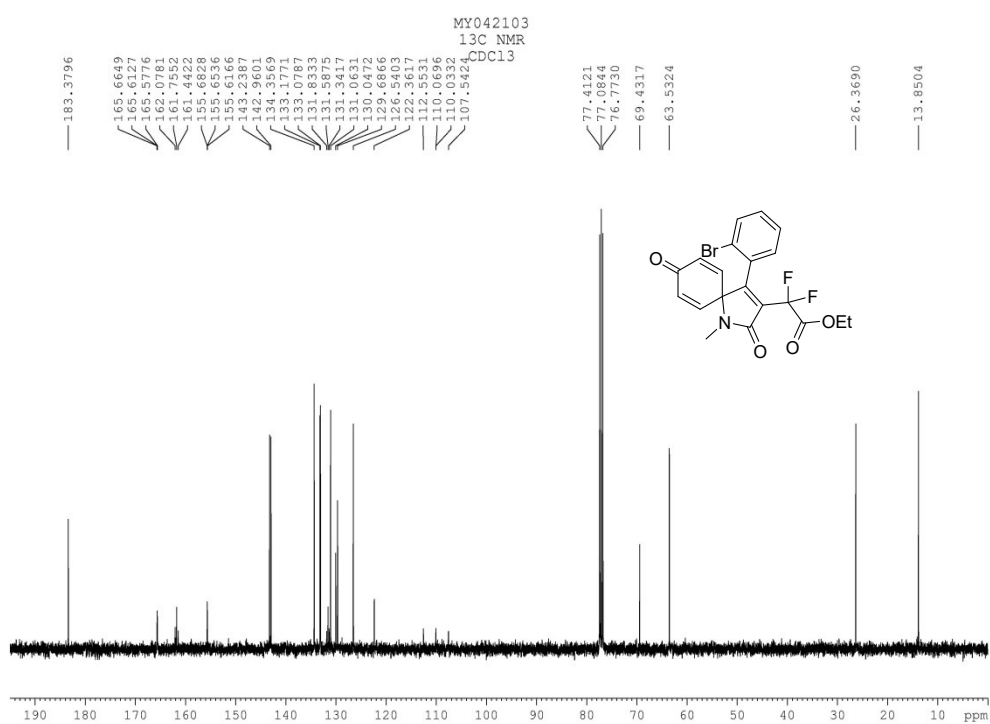

Fig. 42 <sup>13</sup>C NMR spectrum of compound 3n

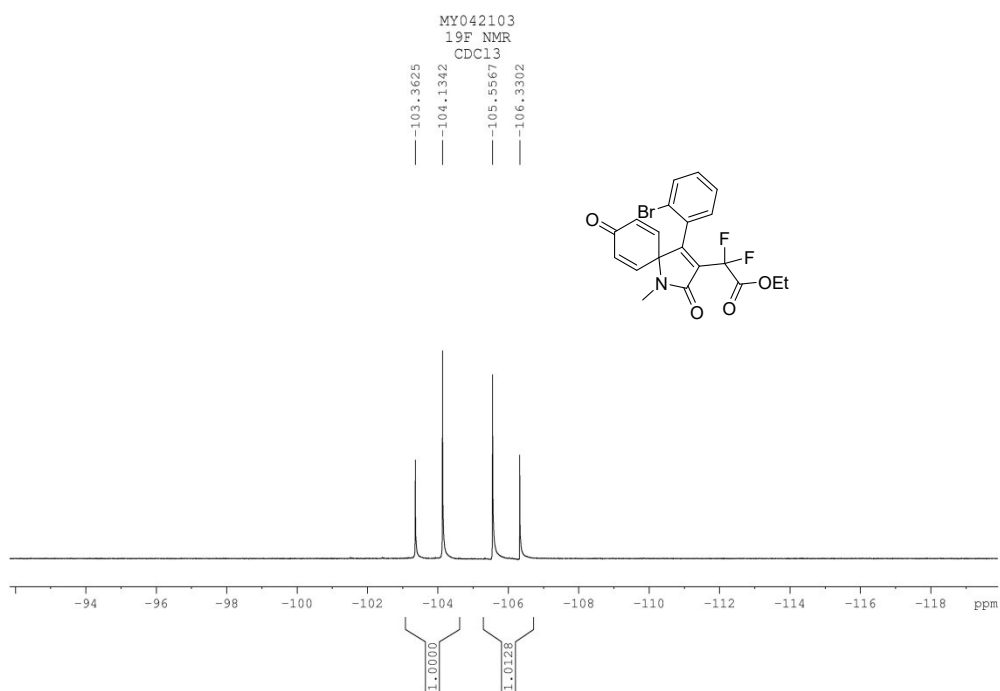

Fig. 43 <sup>19</sup>F NMR spectrum of compound 3n



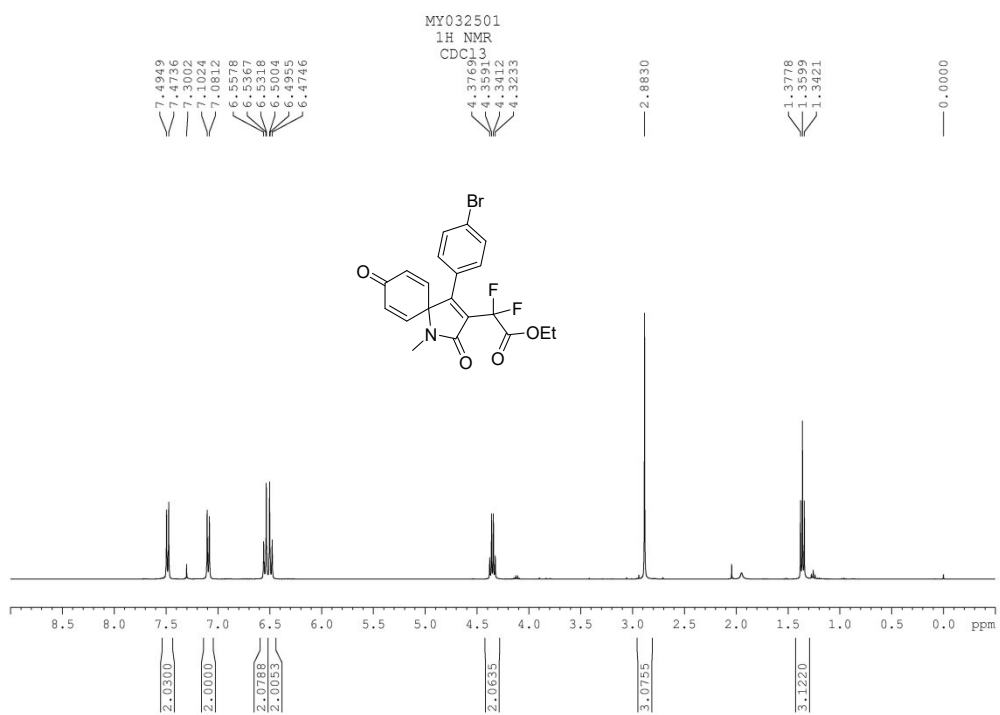

Fig. 44 <sup>1</sup>H NMR spectrum of compound **3o**

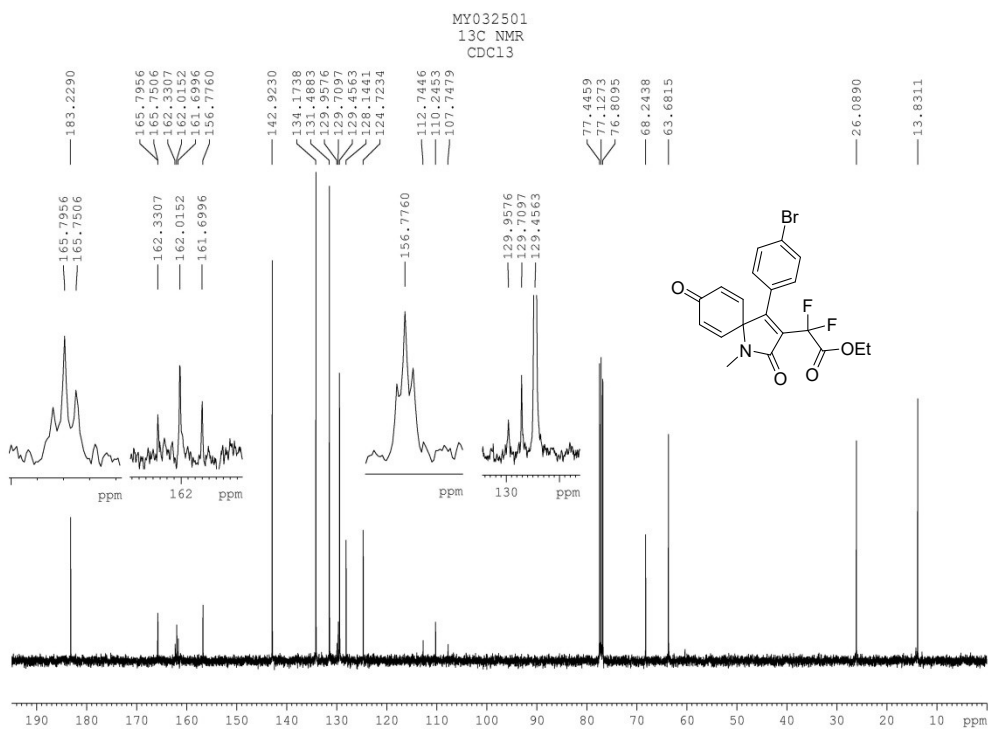

Fig. 45 <sup>13</sup>C NMR spectrum of compound **3o**

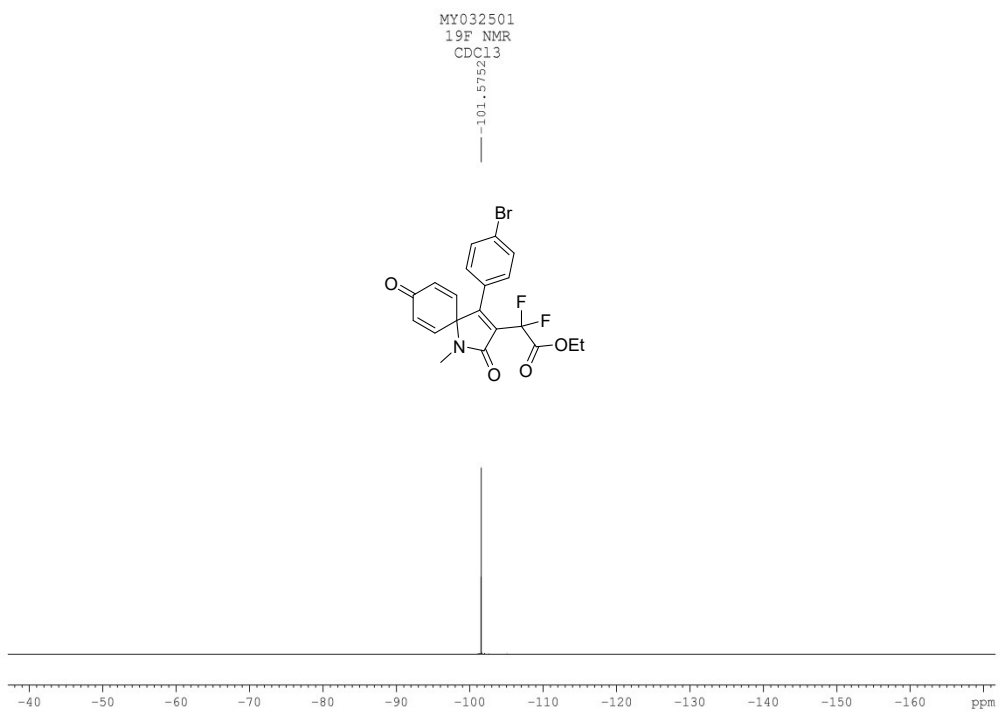

Fig. 46 <sup>19</sup>F NMR spectrum of compound 3o

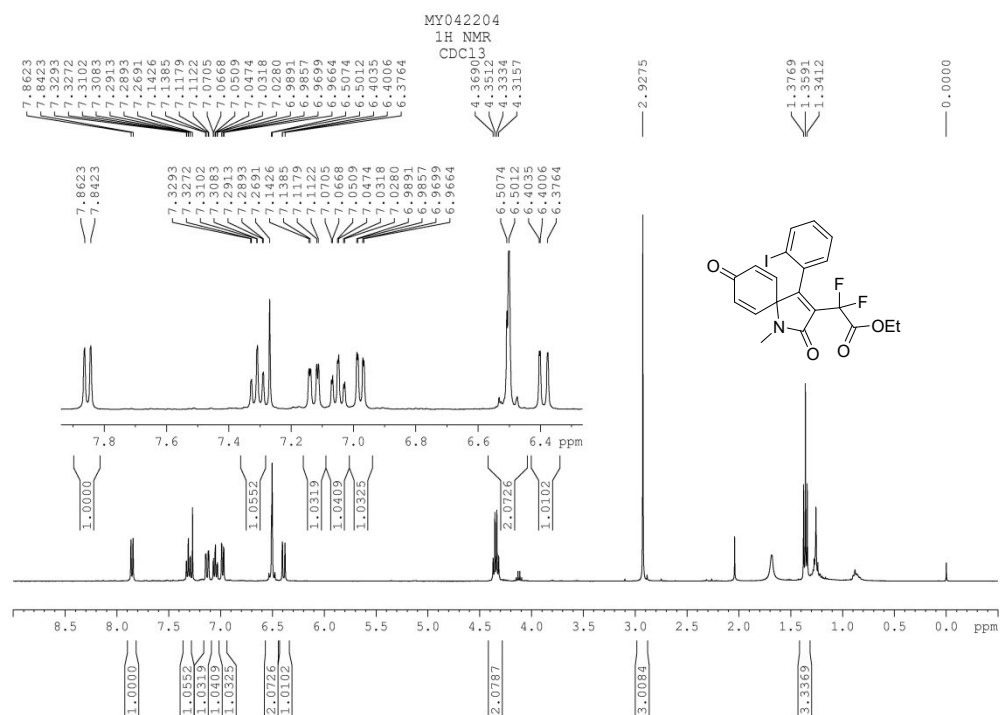

Fig. 47 <sup>1</sup>H NMR spectrum of compound 3p

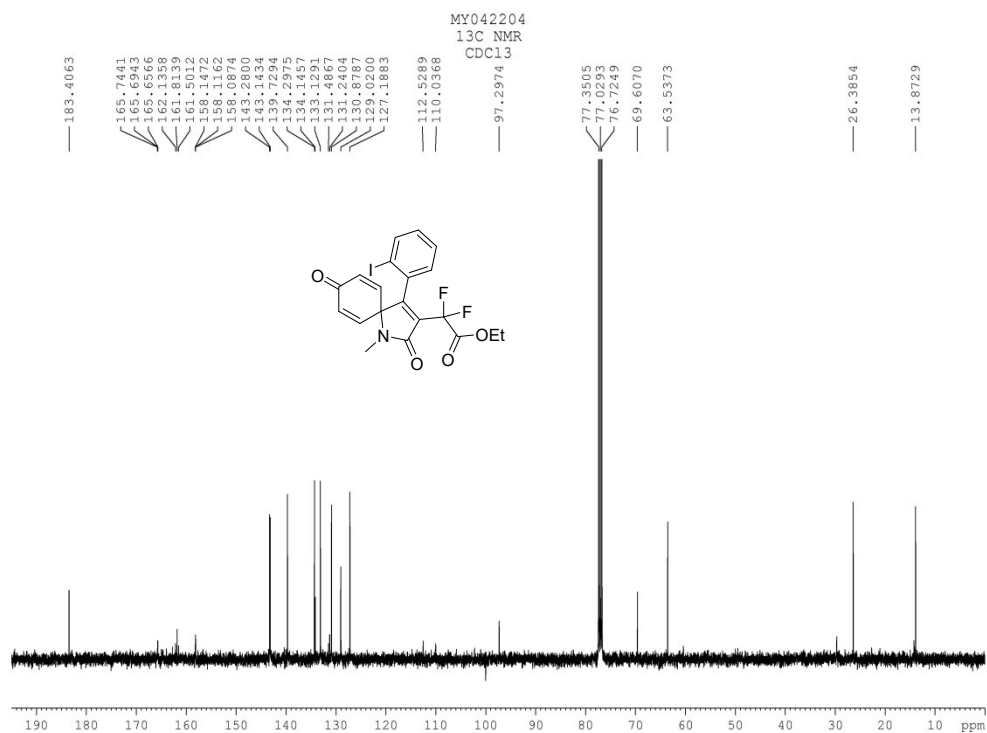

Fig. 48 <sup>13</sup>C NMR spectrum of compound 3p

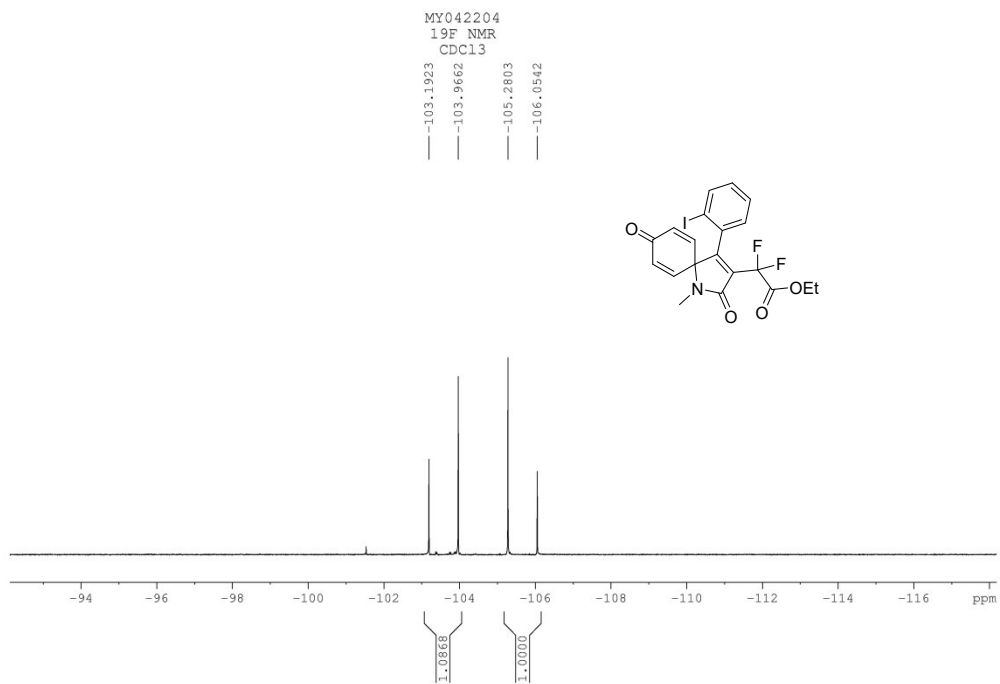

Fig. 49 <sup>19</sup>F NMR spectrum of compound 3p

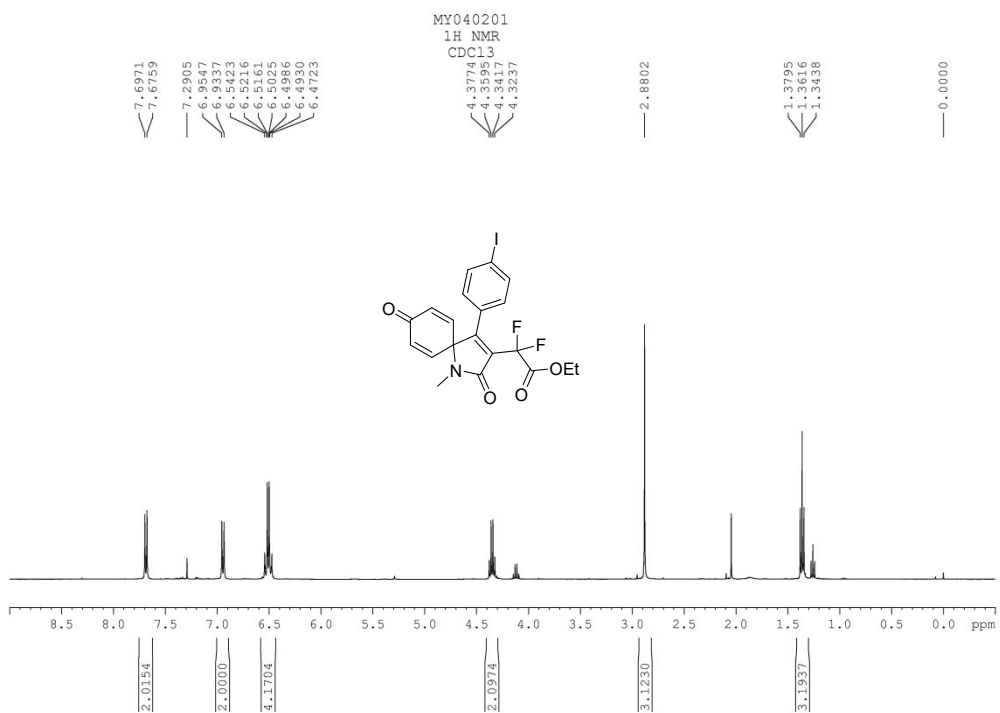

Fig. 50 <sup>1</sup>H NMR spectrum of compound 3q

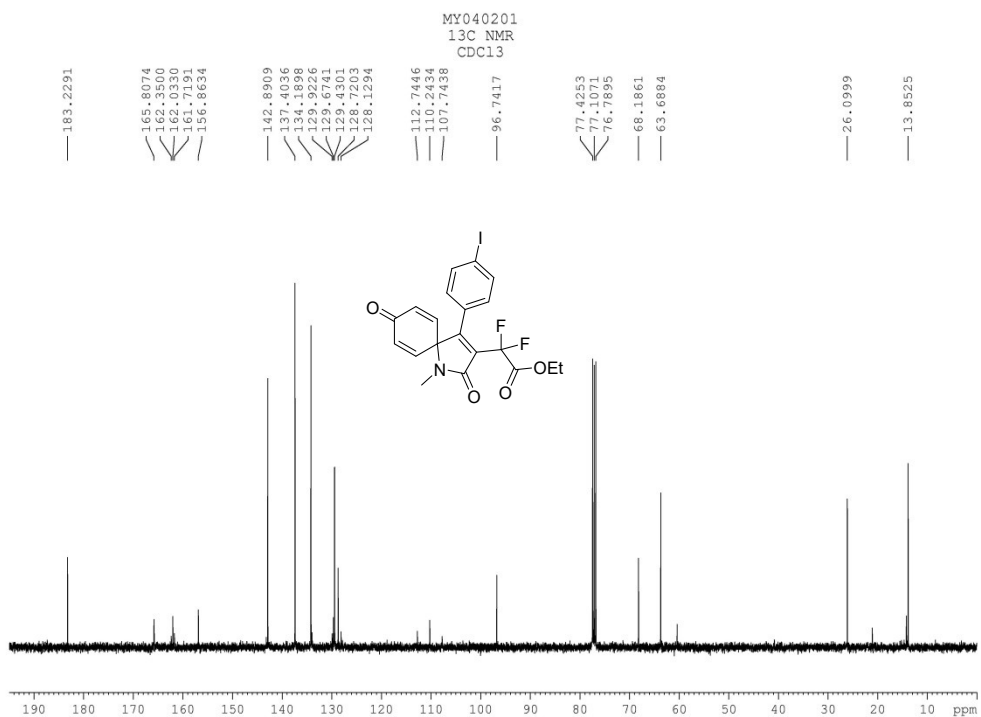

Fig. 51 <sup>13</sup>C NMR spectrum of compound 3q

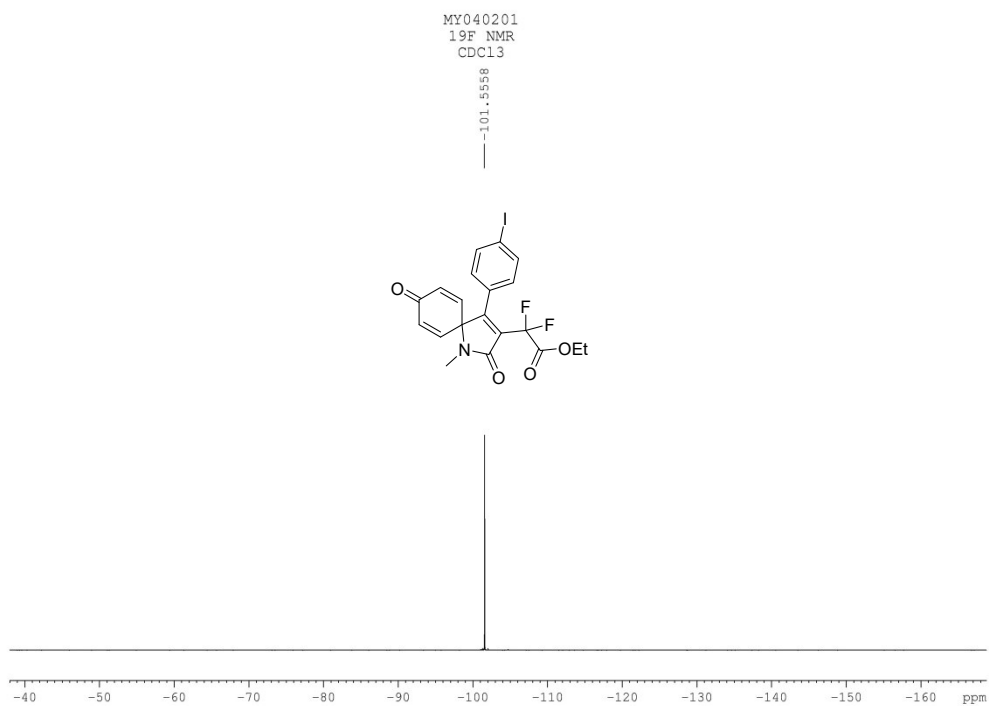

Fig. 52 <sup>19</sup>F NMR spectrum of compound 3q

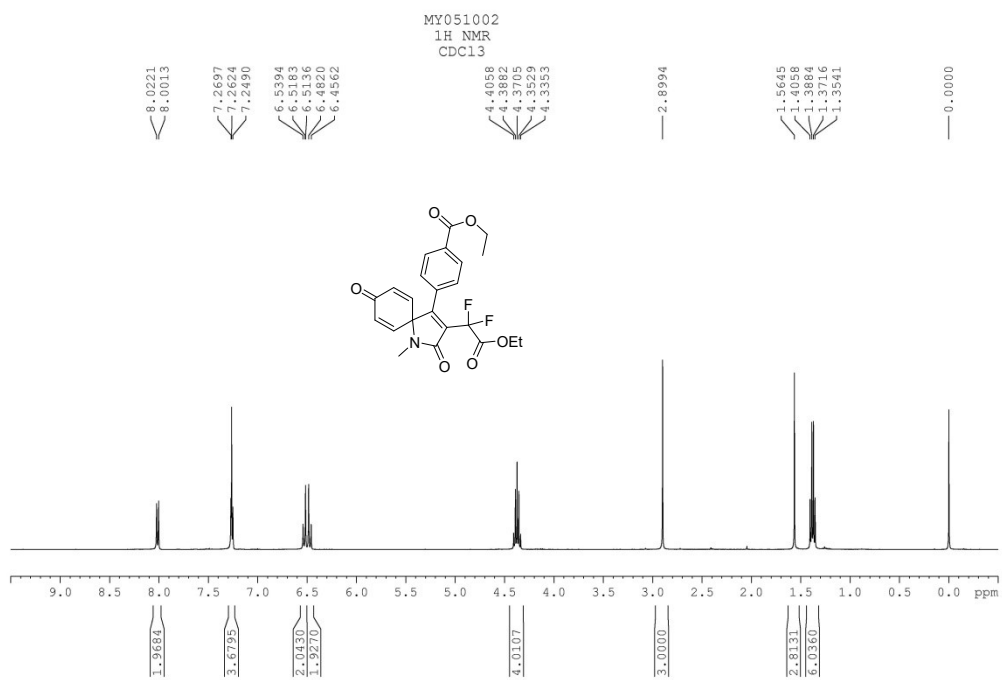

Fig. 53 <sup>1</sup>H NMR spectrum of compound 3r

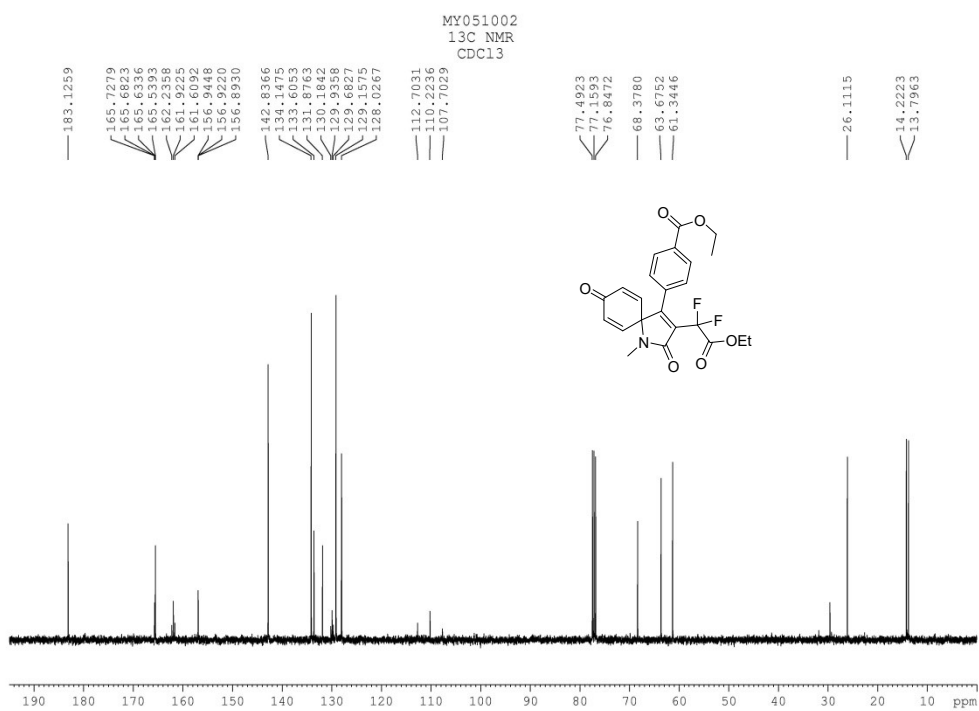

Fig. 54 <sup>13</sup>C NMR spectrum of compound 3r

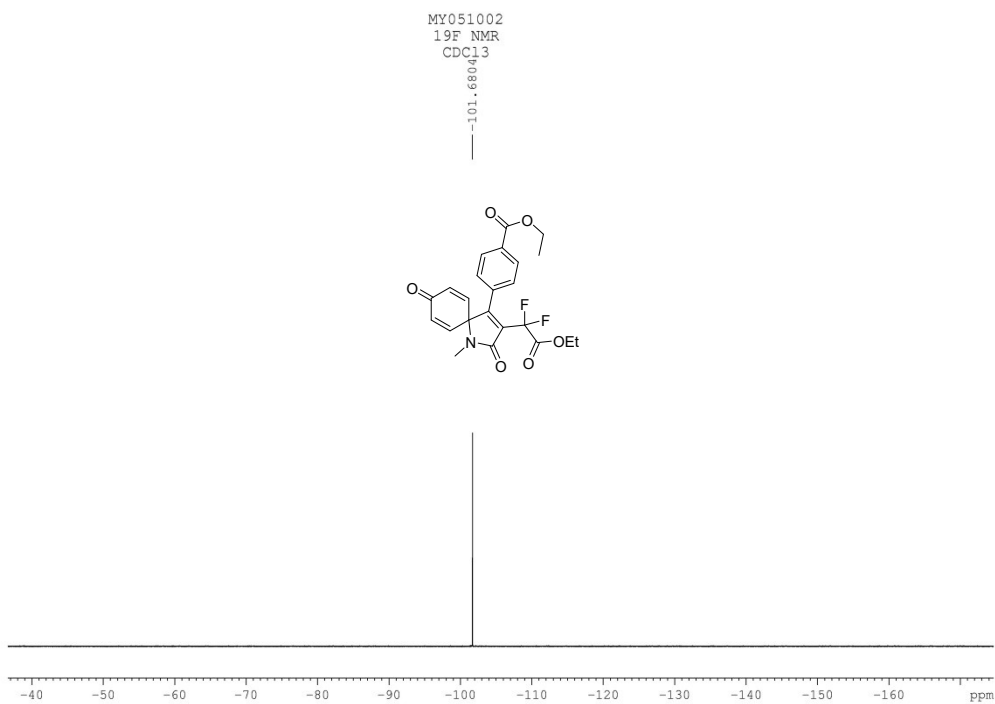

Fig. 55 <sup>19</sup>F NMR spectrum of compound 3r

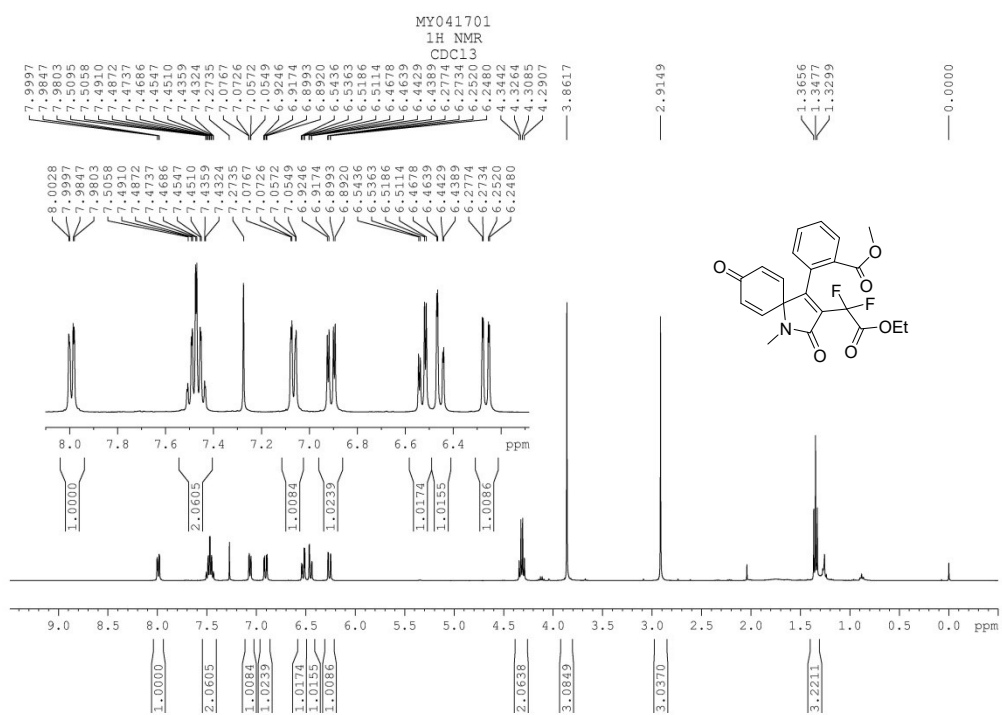

Fig. 56 <sup>1</sup>H NMR spectrum of compound 3s

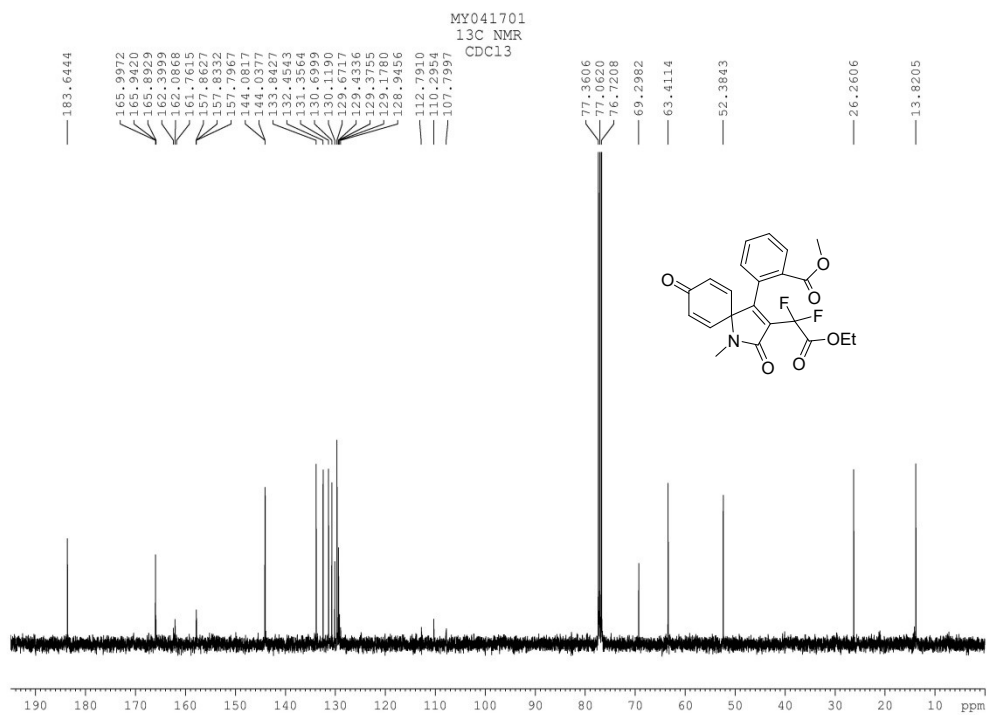

Fig. 57 <sup>13</sup>C NMR spectrum of compound 3s

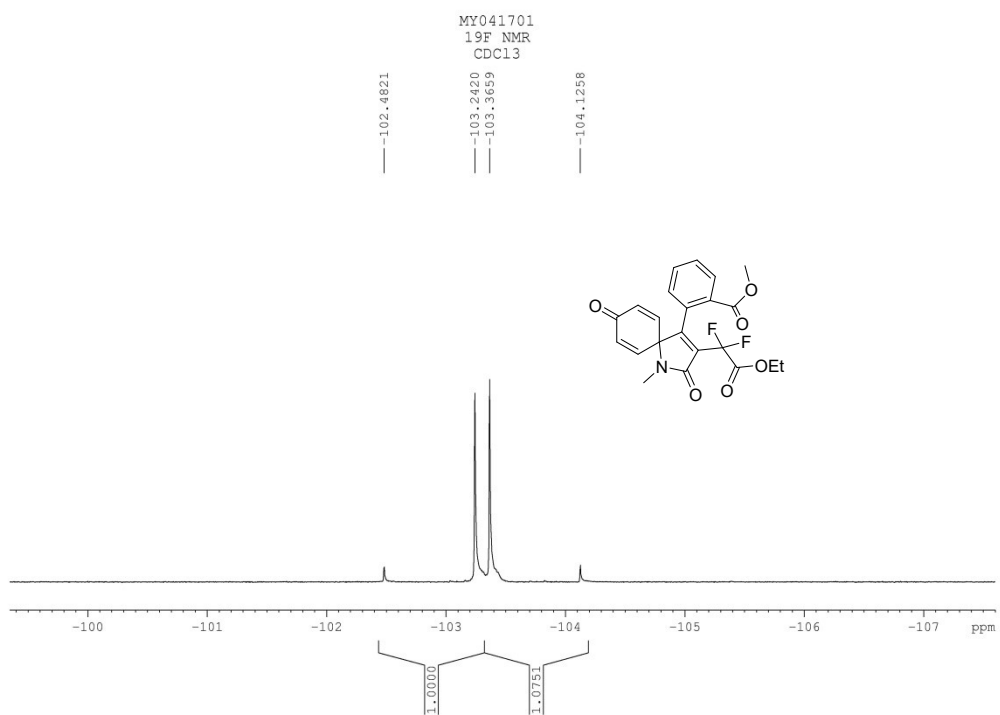

Fig. 58 <sup>19</sup>F NMR spectrum of compound 3s

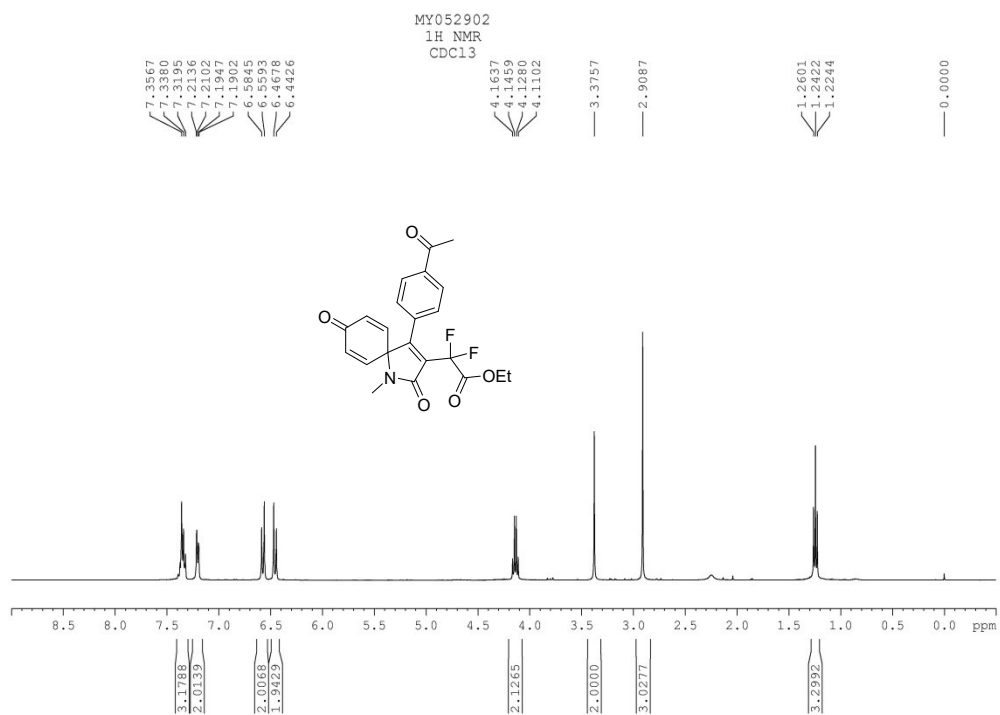

Fig. 59 <sup>1</sup>H NMR spectrum of compound 3t



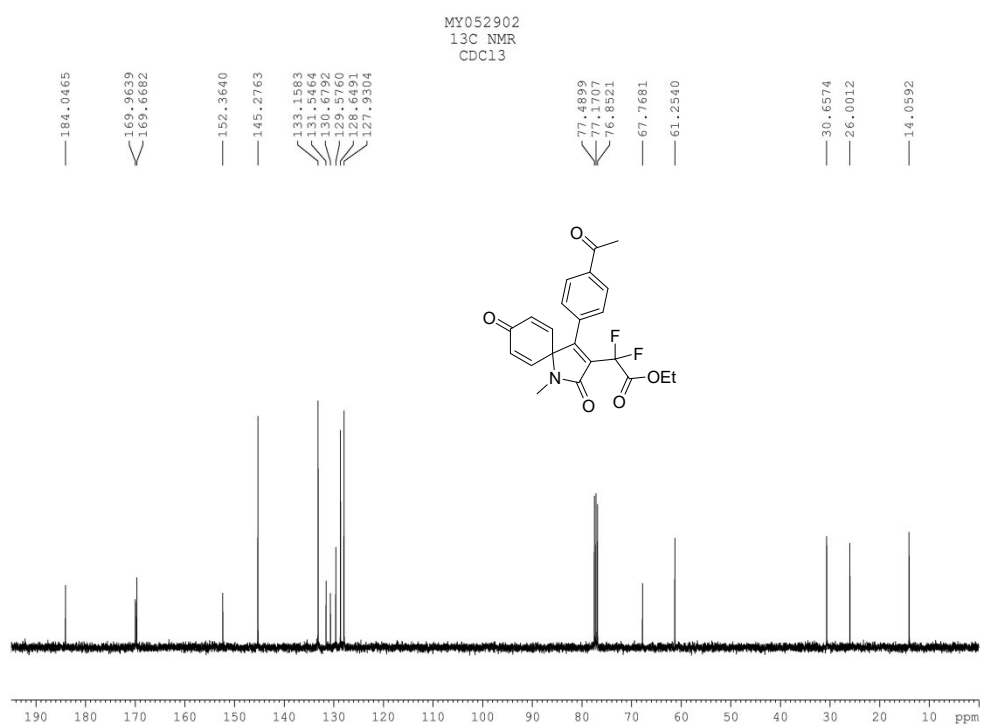

Fig. 60 <sup>13</sup>C NMR spectrum of compound 3t

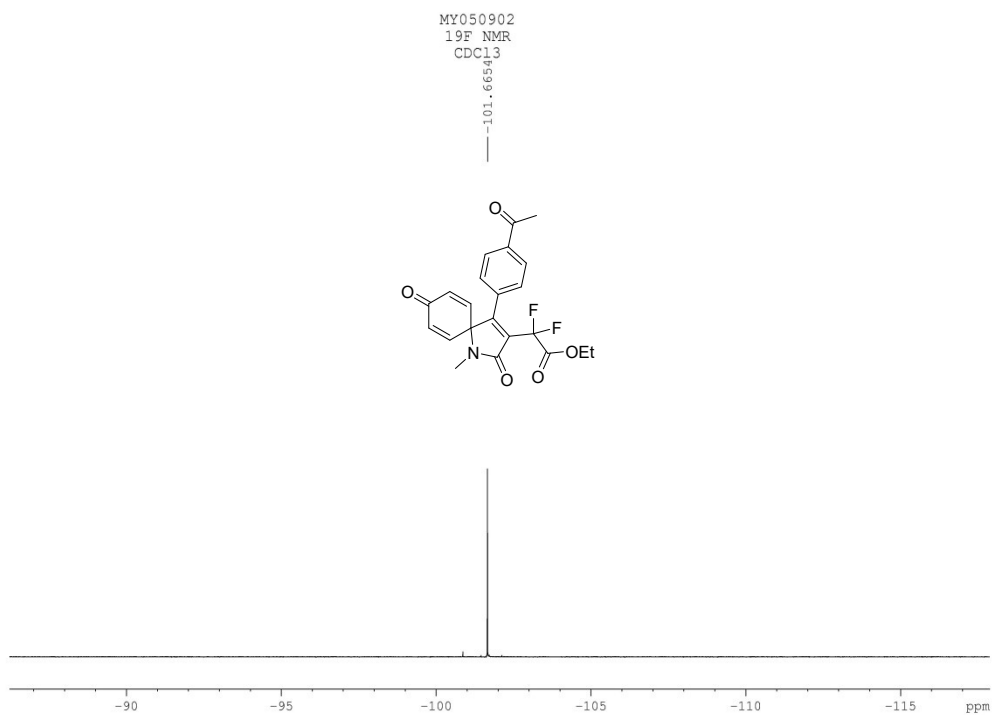

Fig. 61 <sup>19</sup>F NMR spectrum of compound 3t

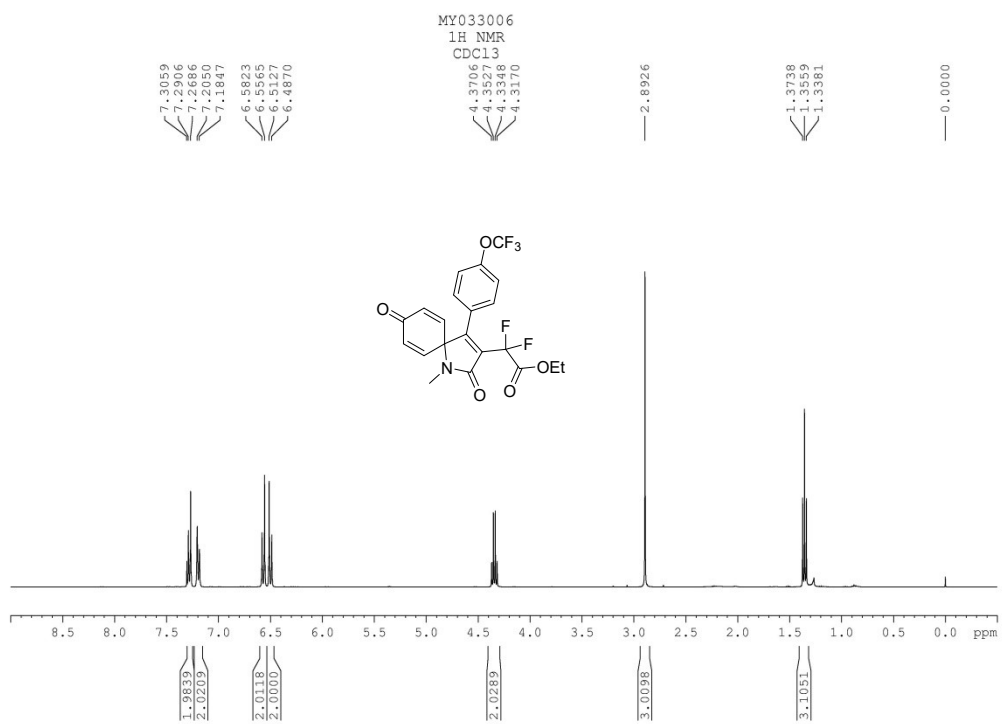

Fig. 62 <sup>1</sup>H NMR spectrum of compound 3u

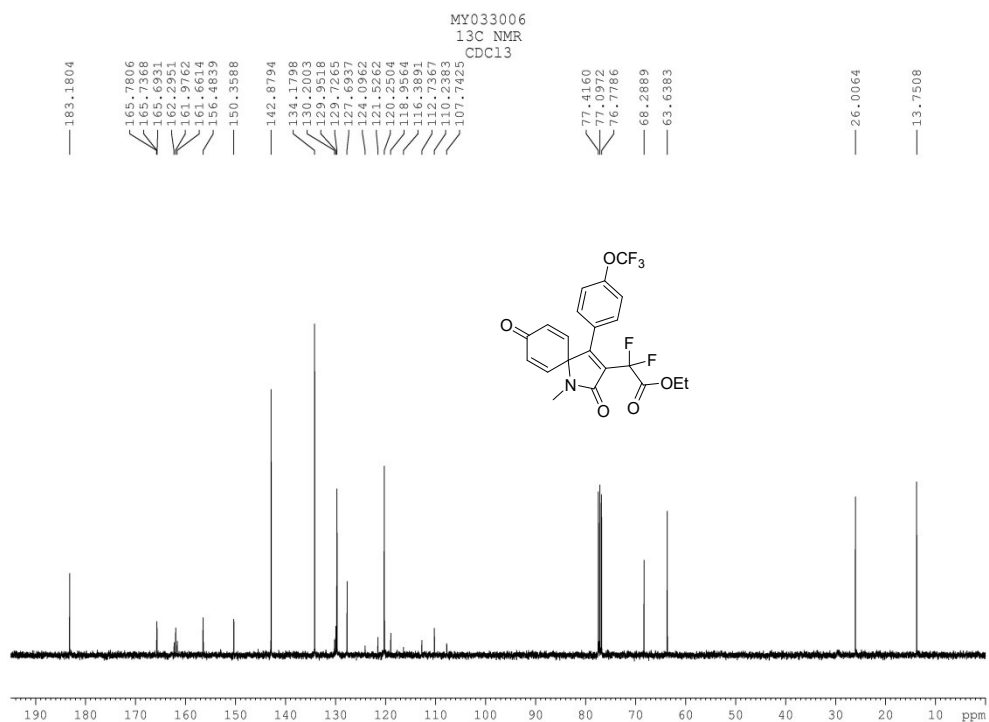

Fig. 63 <sup>13</sup>C NMR spectrum of compound 3u

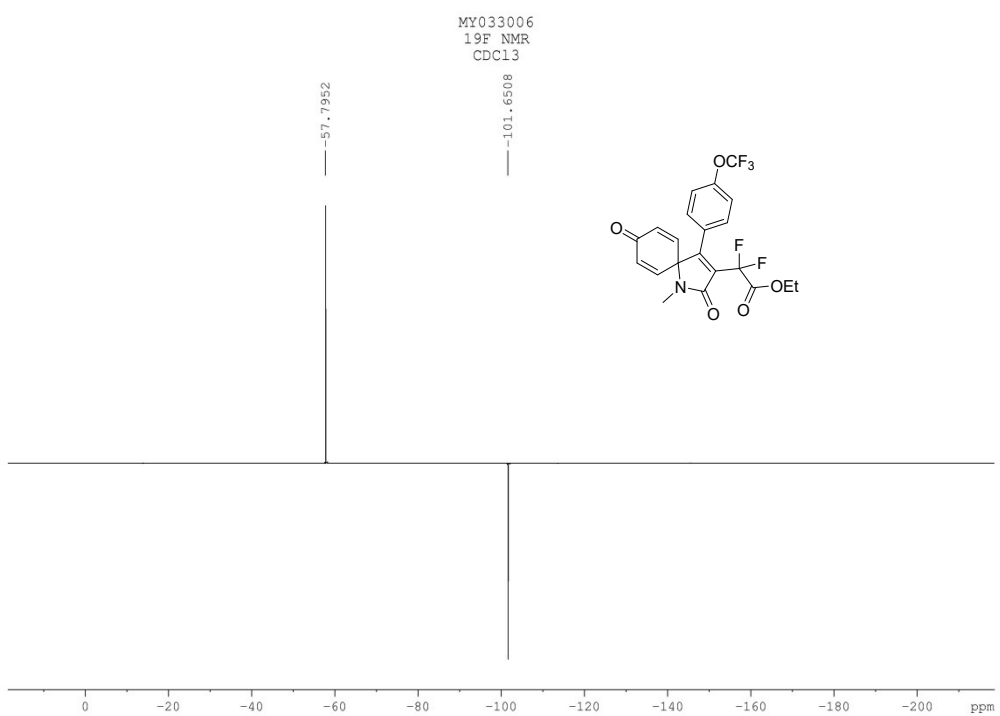

**Fig. 64** <sup>19</sup>F NMR spectrum of compound **3u**

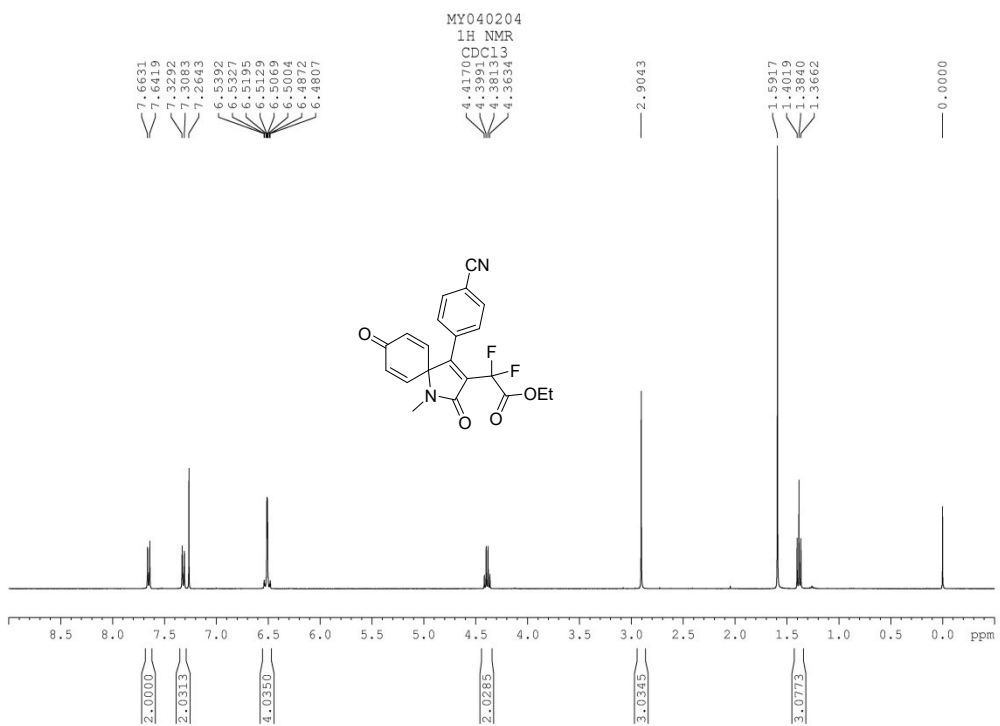

**Fig. 65** <sup>1</sup>H NMR spectrum of compound **3v**

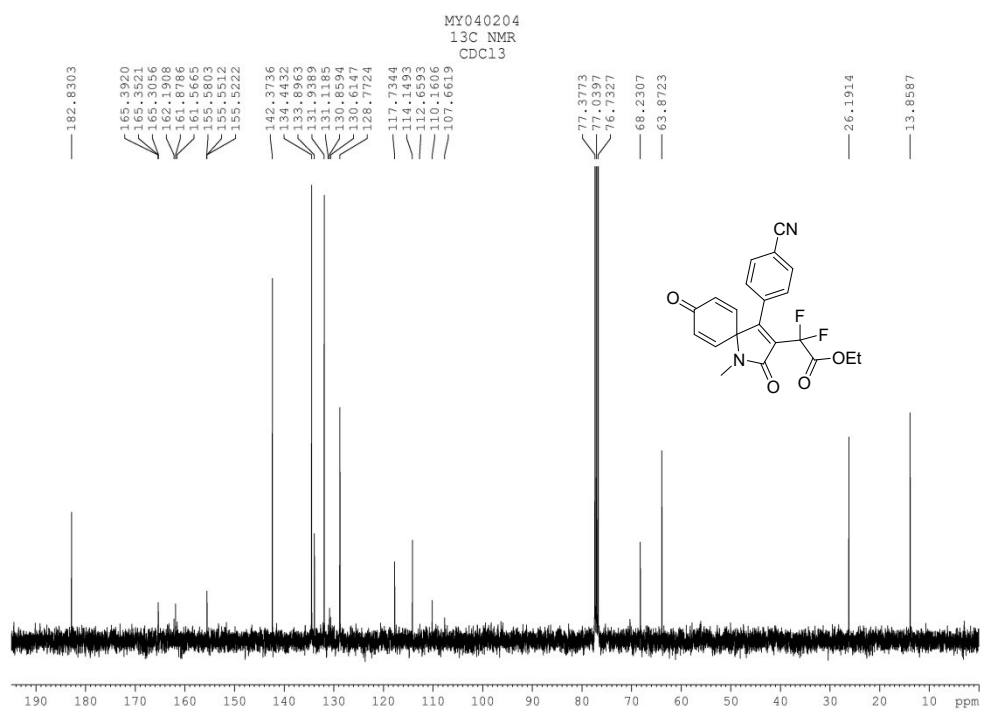

Fig. 66 <sup>13</sup>C NMR spectrum of compound **3v**

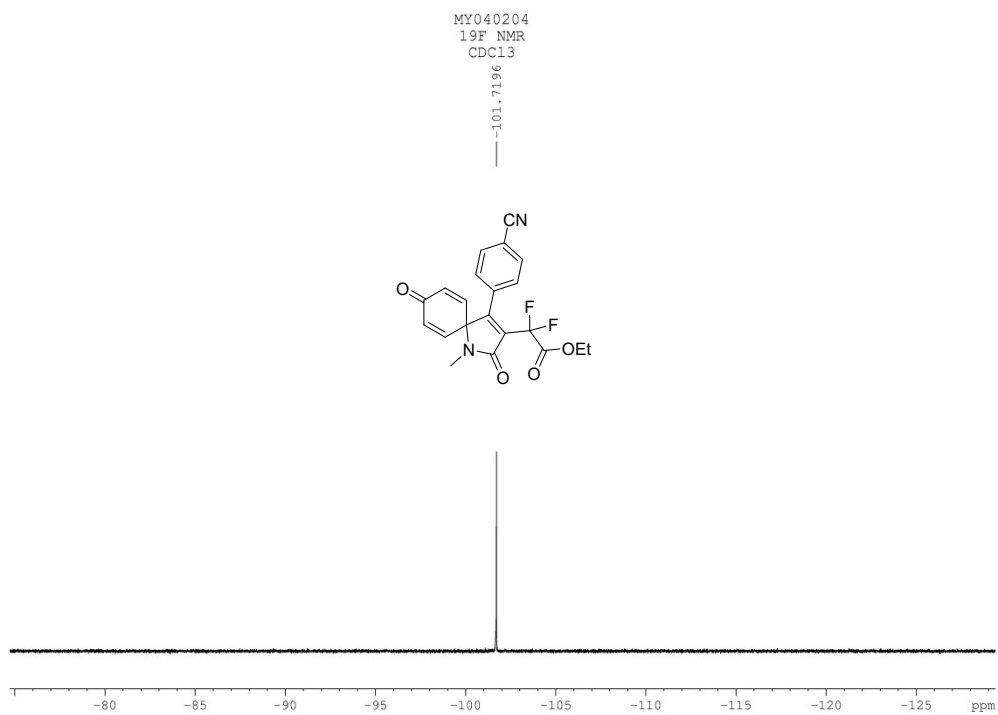

Fig. 67 <sup>19</sup>F NMR spectrum of compound **3v**

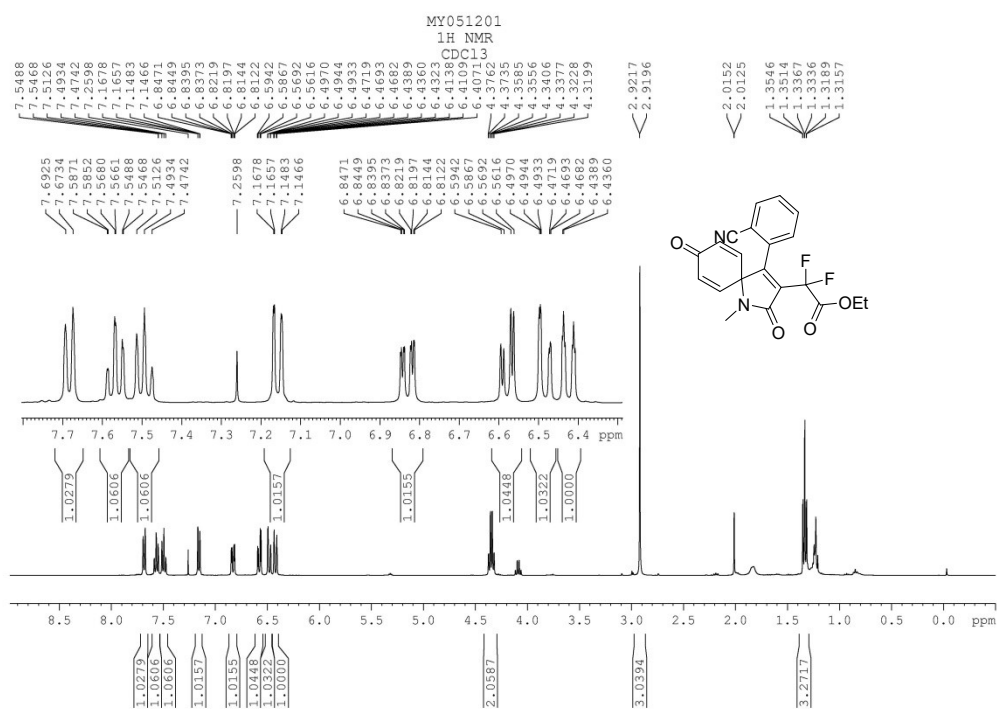

Fig. 68 <sup>1</sup>H NMR spectrum of compound 3w

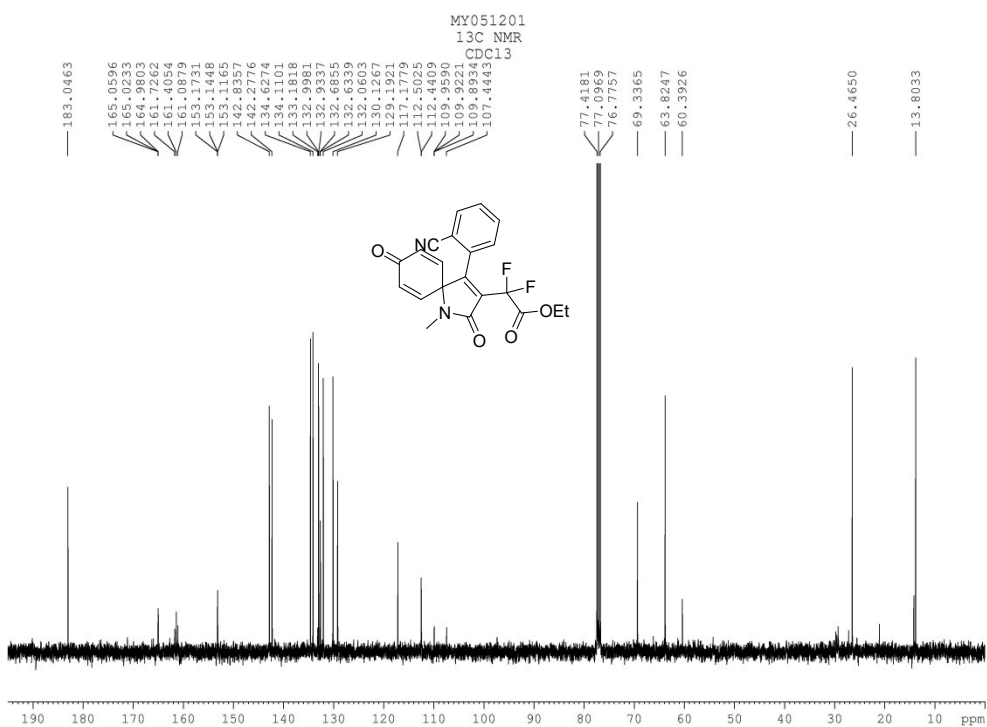

Fig. 69 <sup>13</sup>C NMR spectrum of compound 3w

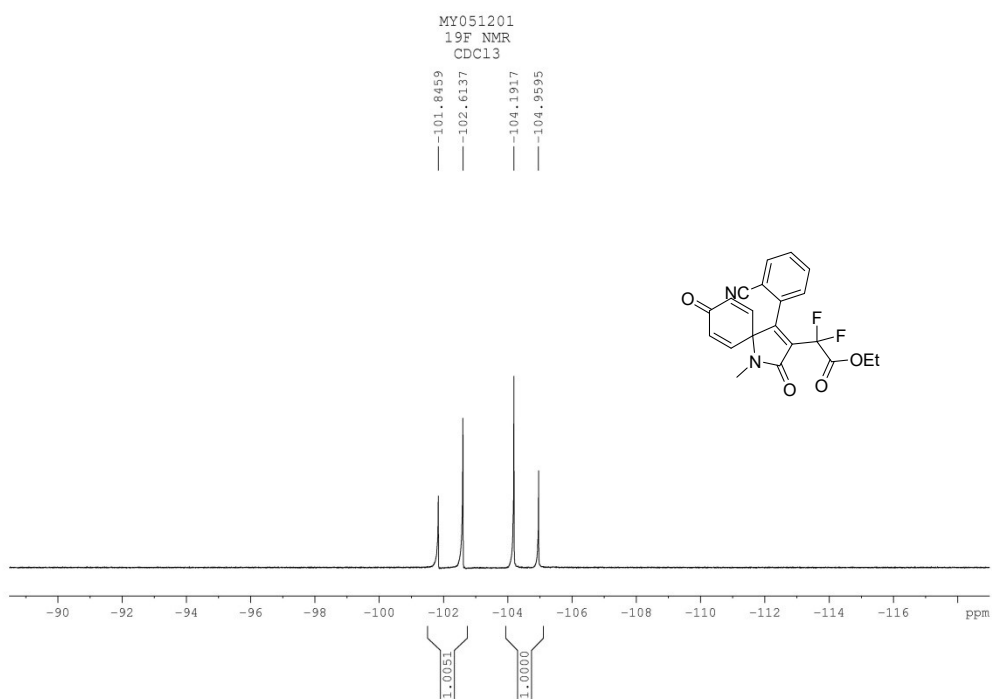

**Fig. 70** <sup>19</sup>F NMR spectrum of compound **3w**

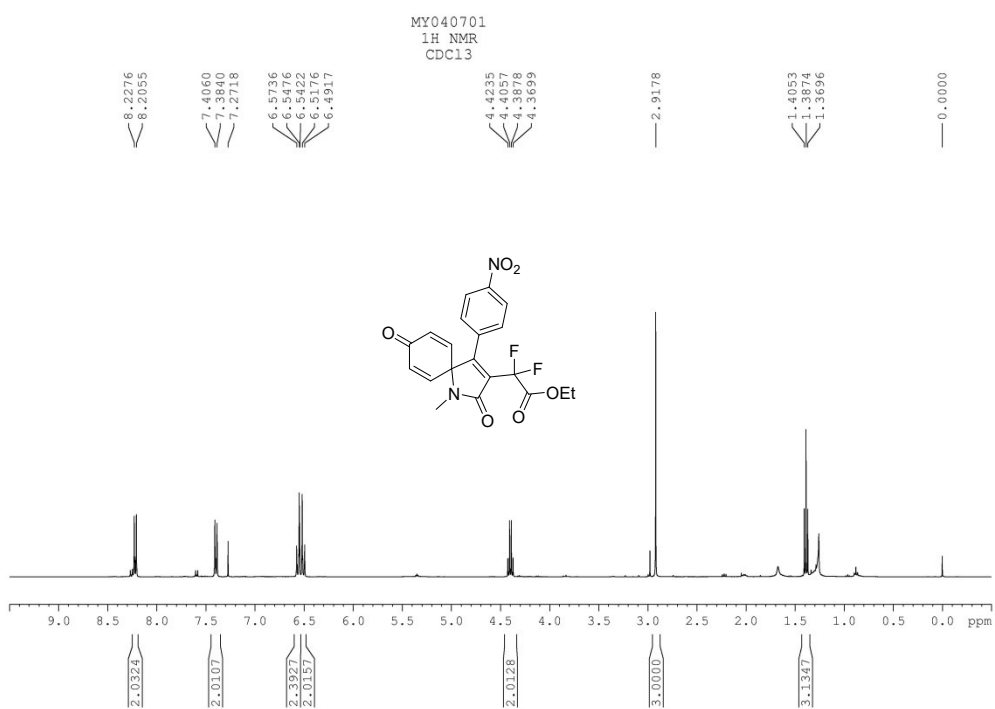

**Fig. 71** <sup>1</sup>H NMR spectrum of compound **3x**

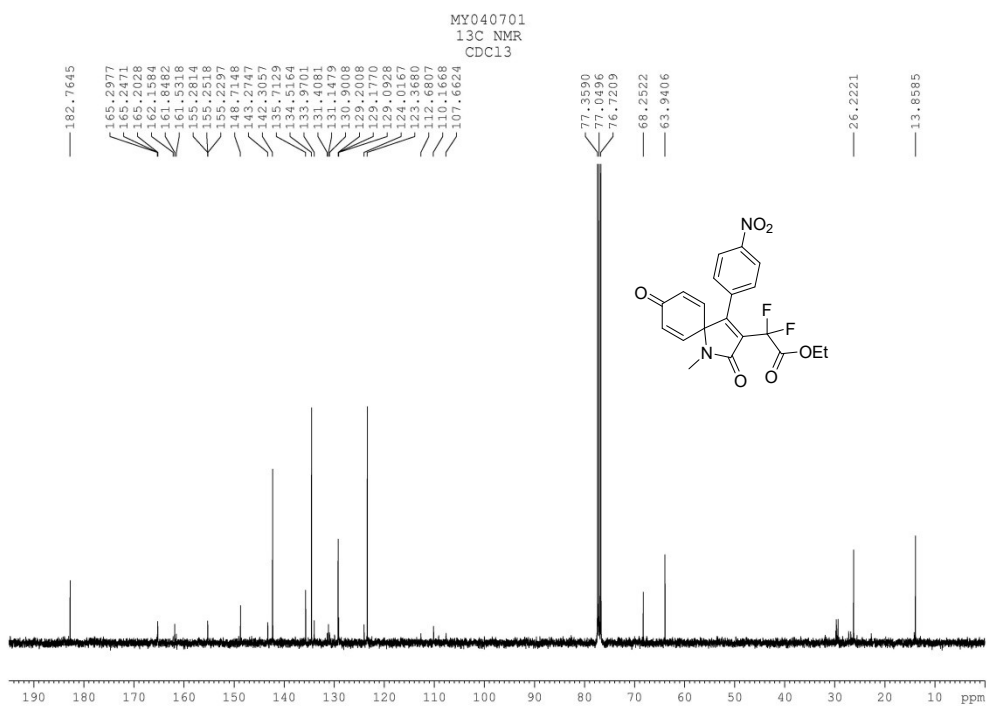

Fig. 72 <sup>13</sup>C NMR spectrum of compound **3x**

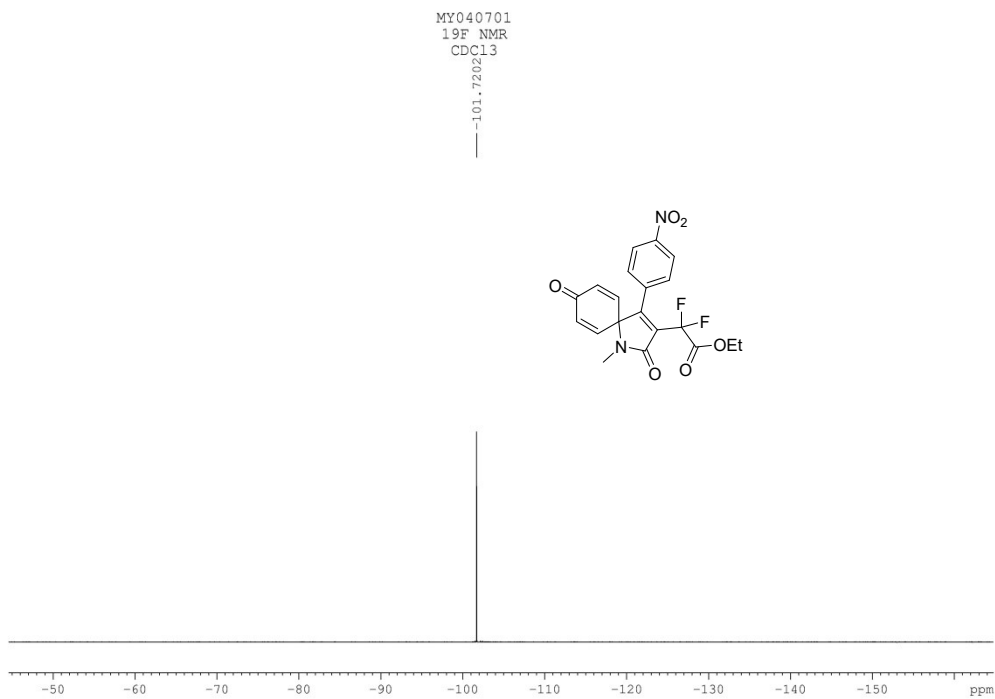

Fig. 73 <sup>19</sup>F NMR spectrum of compound **3x**

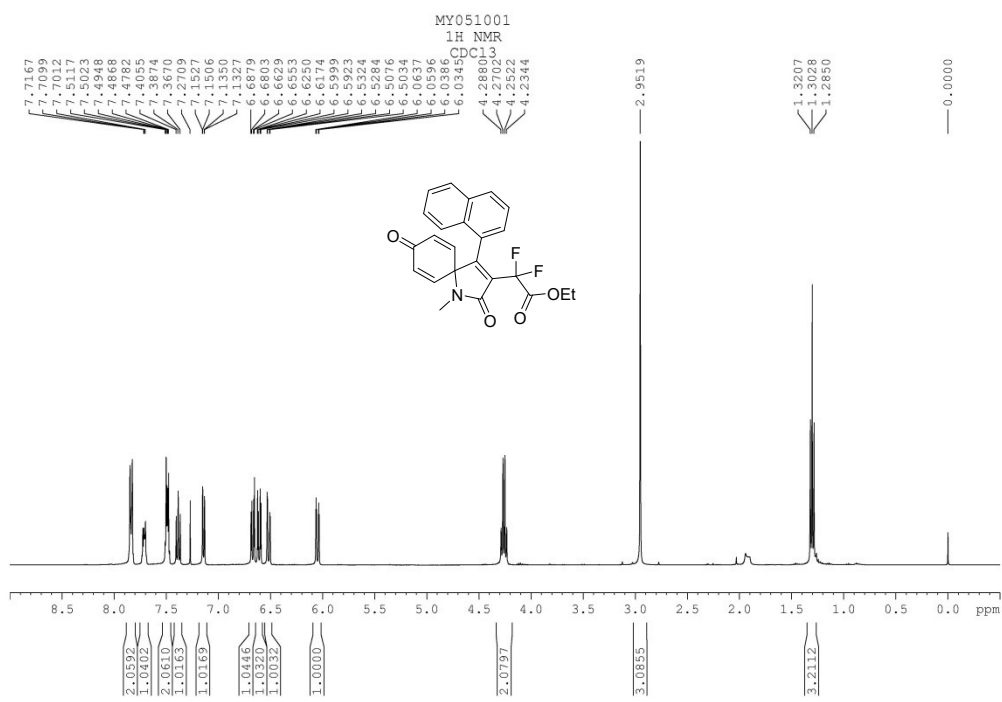

Fig. 74 <sup>1</sup>H NMR spectrum of compound **3y**

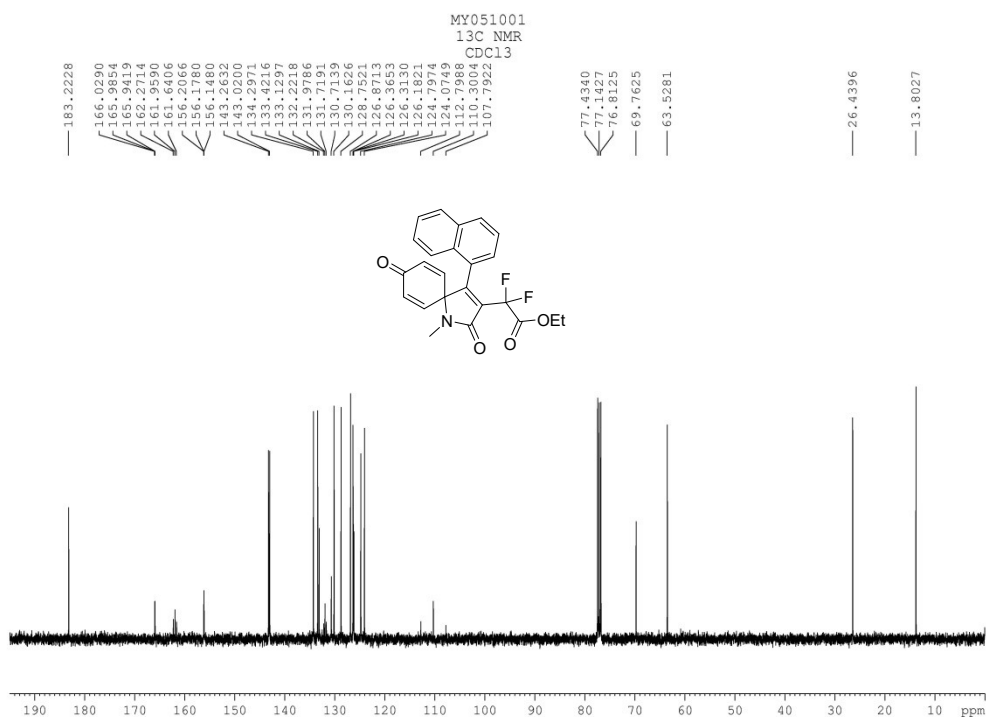

Fig. 75 <sup>13</sup>C NMR spectrum of compound **3y**



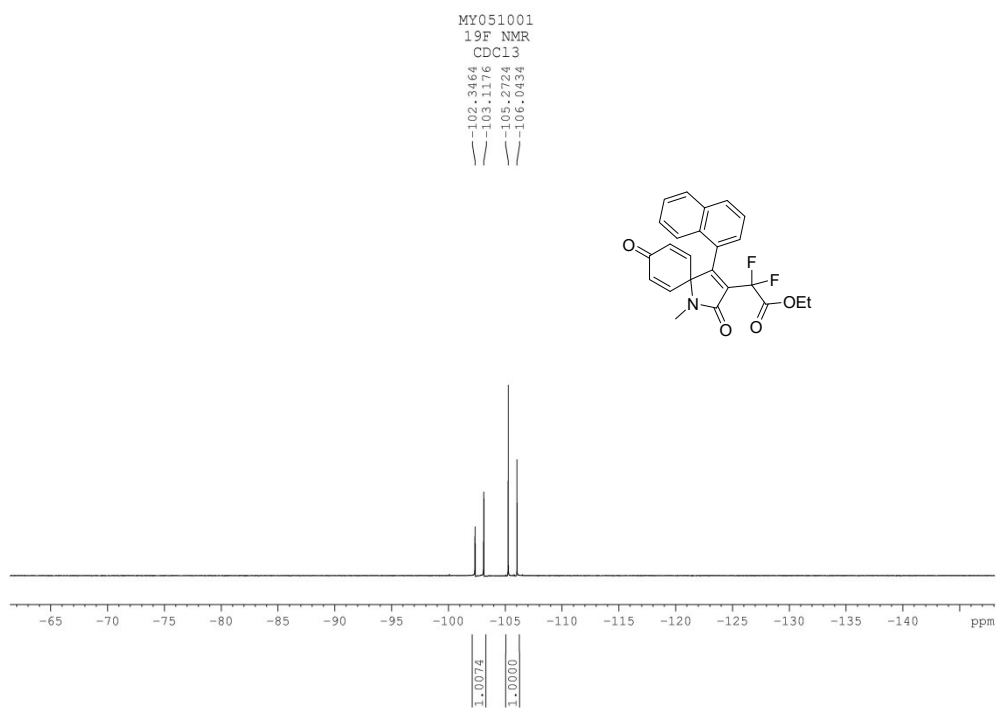

Fig. 76 <sup>19</sup>F NMR spectrum of compound 3y

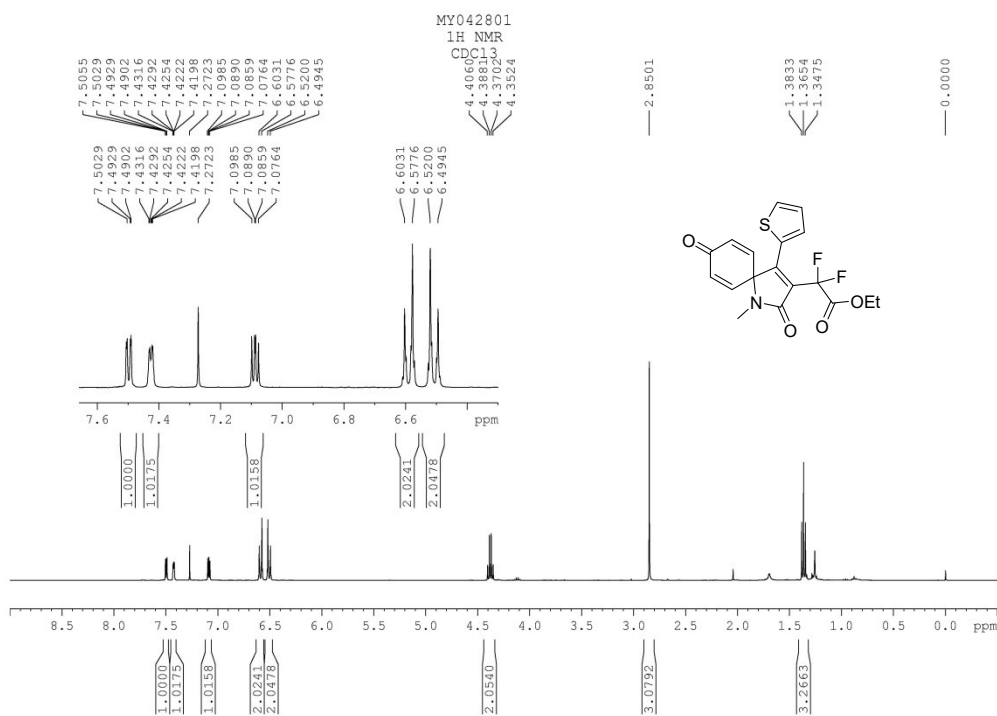

Fig. 77 <sup>1</sup>H NMR spectrum of compound 3z

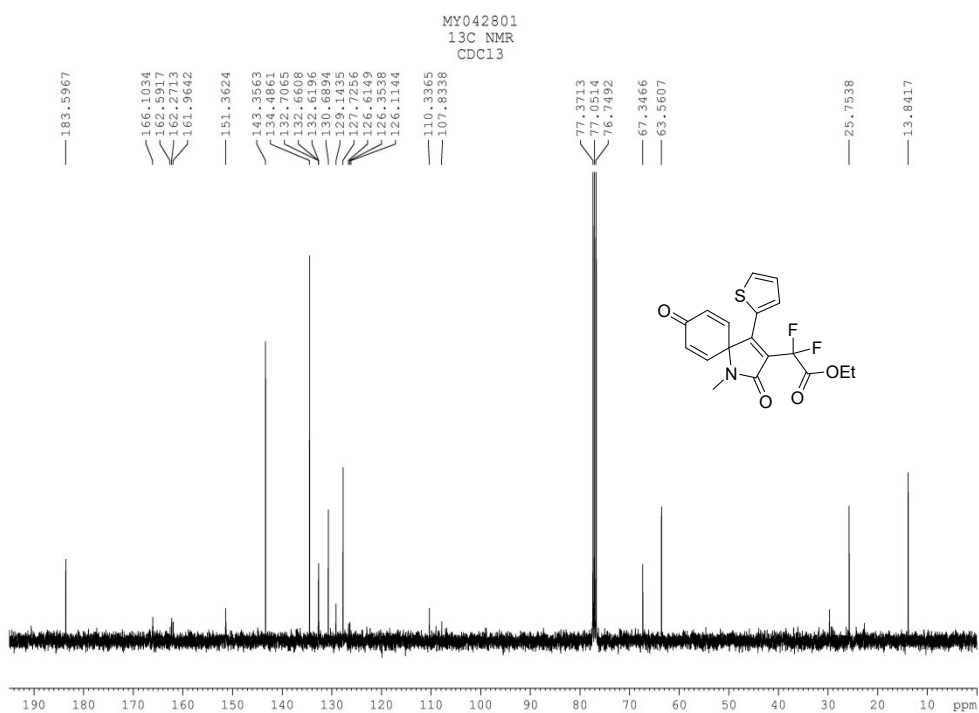

Fig. 78 <sup>13</sup>C NMR spectrum of compound 3z

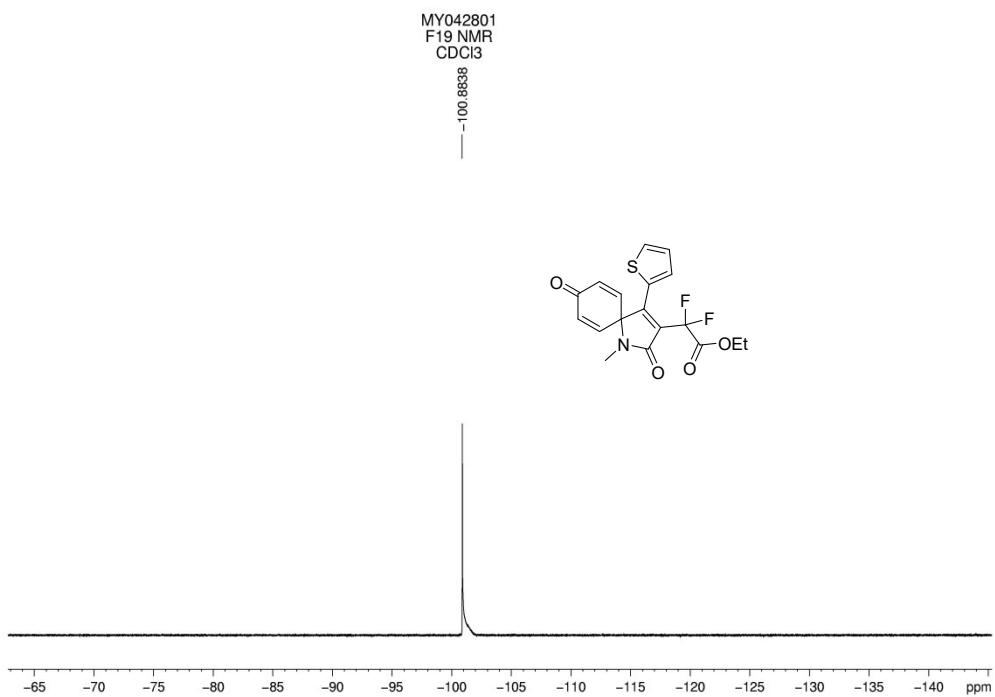

Fig. 79 <sup>19</sup>F NMR spectrum of compound 3z

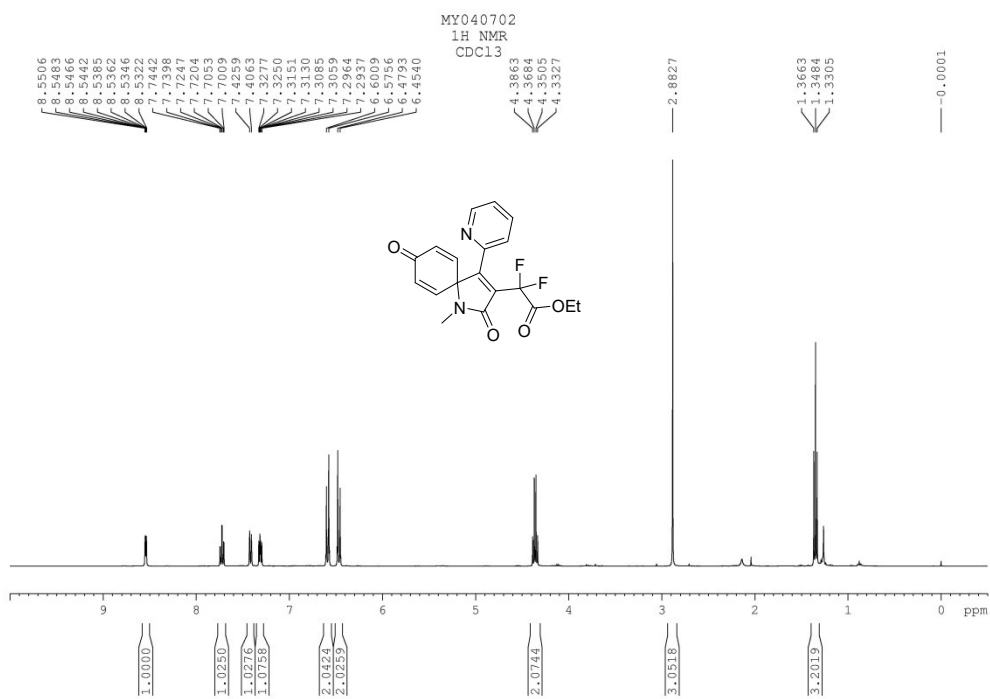

Fig. 80 <sup>1</sup>H NMR spectrum of compound **3ab**

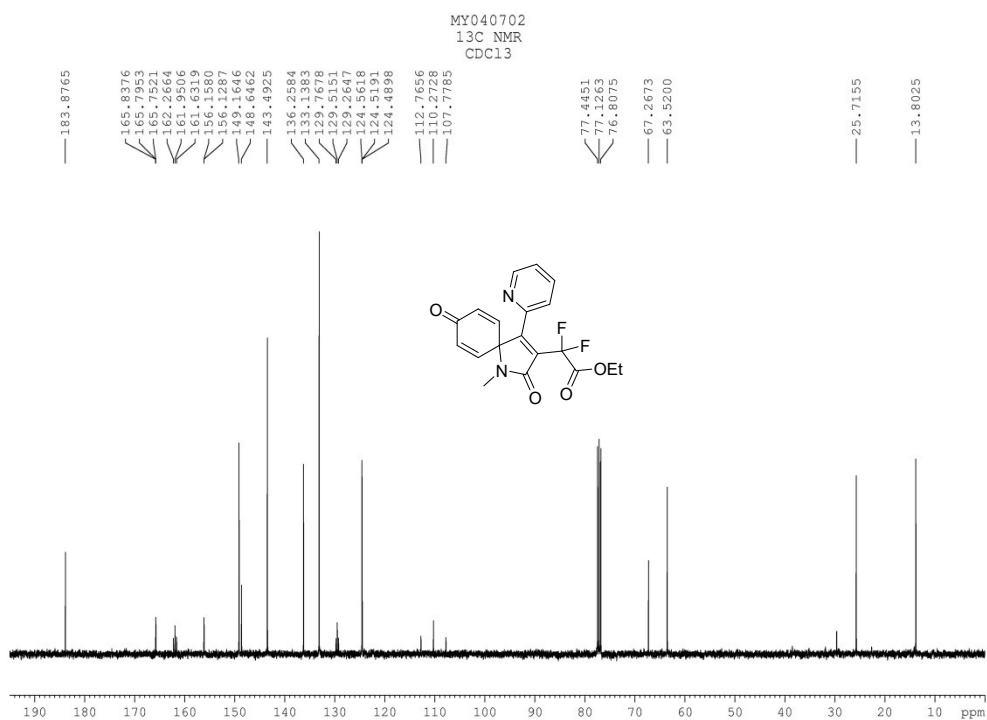

Fig. 81 <sup>13</sup>C NMR spectrum of compound **3ab**

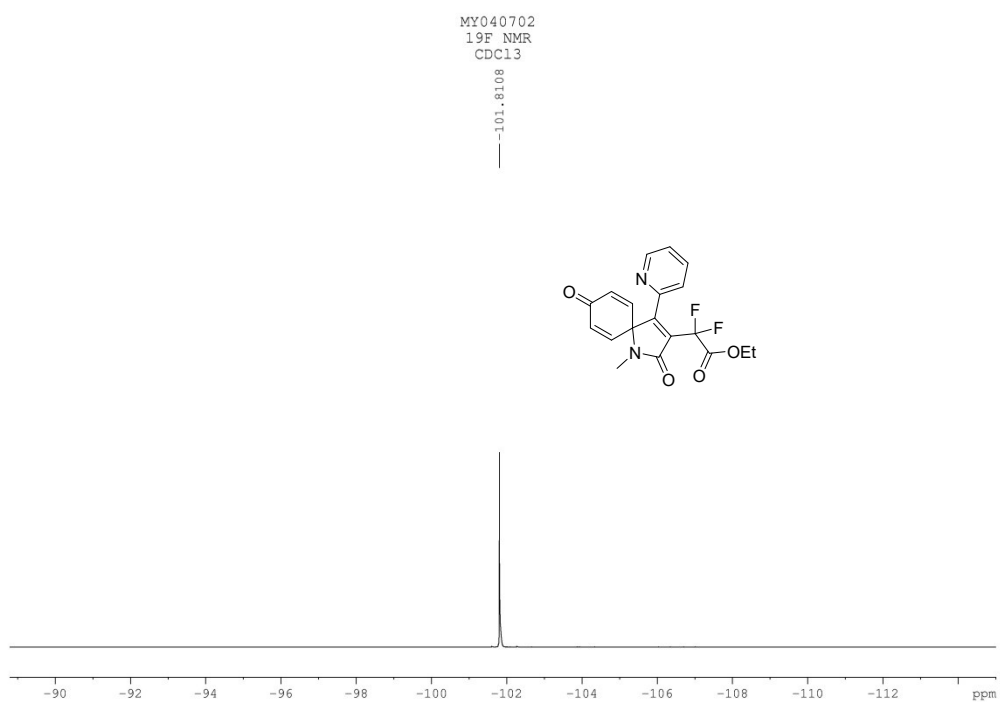

Fig. 82 <sup>19</sup>F NMR spectrum of compound 3ab

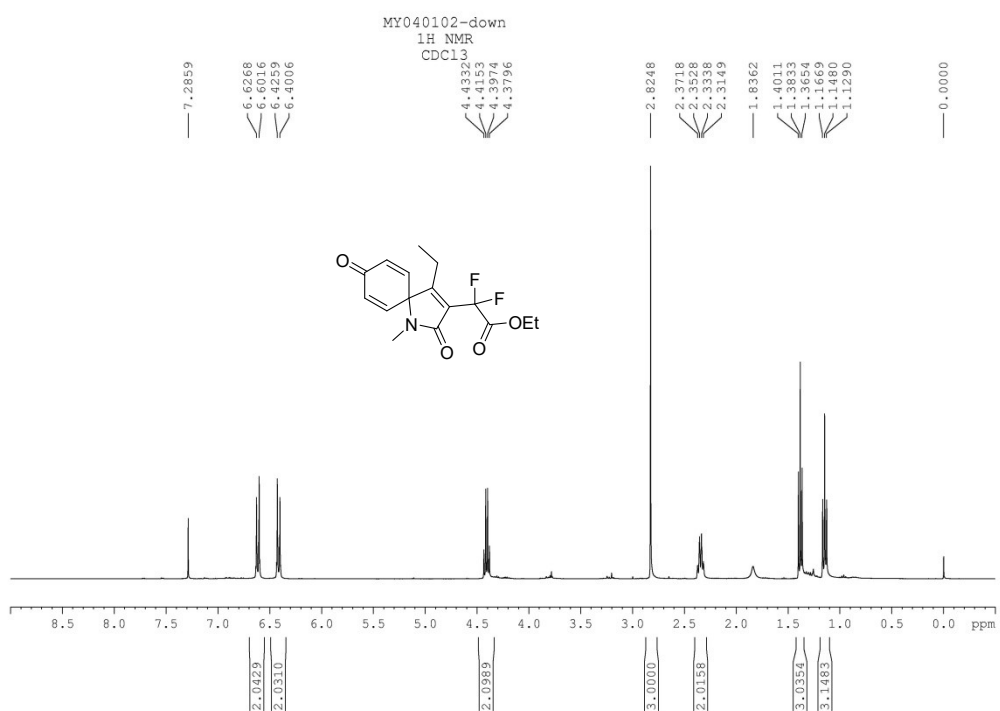

Fig. 83 <sup>1</sup>H NMR spectrum of compound 3ac

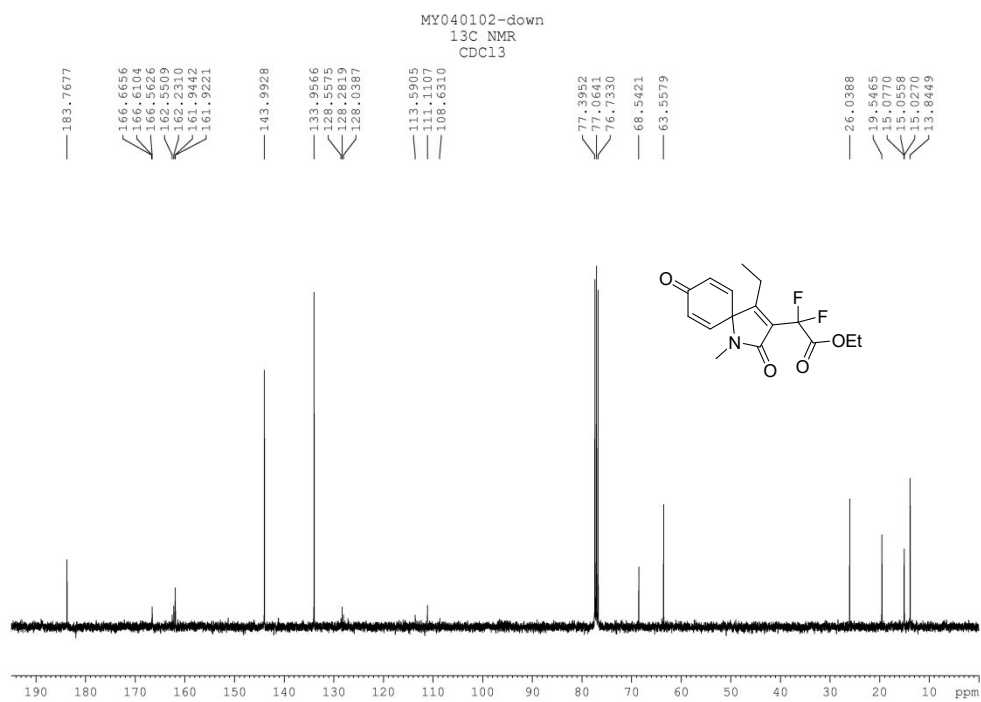

Fig. 84 <sup>13</sup>C NMR spectrum of compound 3ac

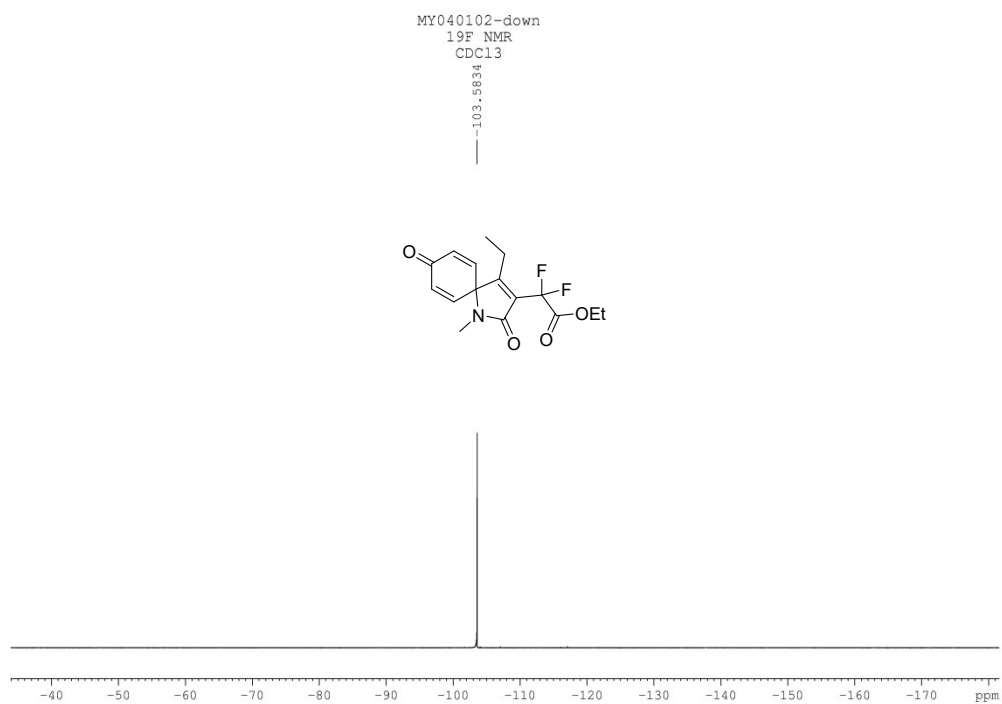

Fig. 85 <sup>19</sup>F NMR spectrum of compound 3ac

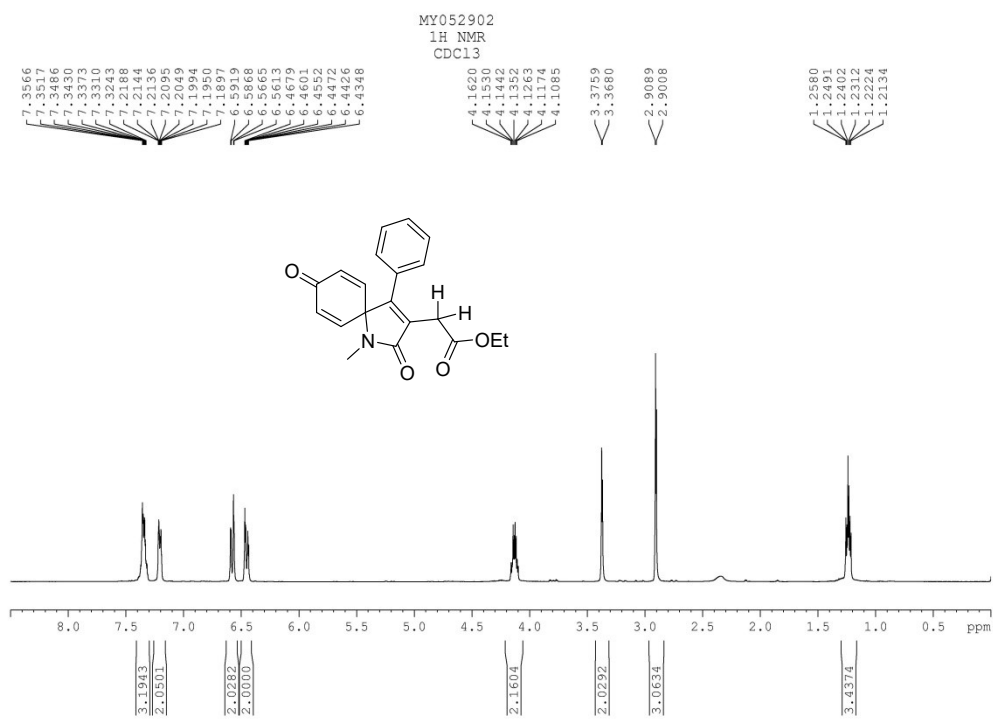

Fig. 86 <sup>1</sup>H NMR spectrum of compound 3ad

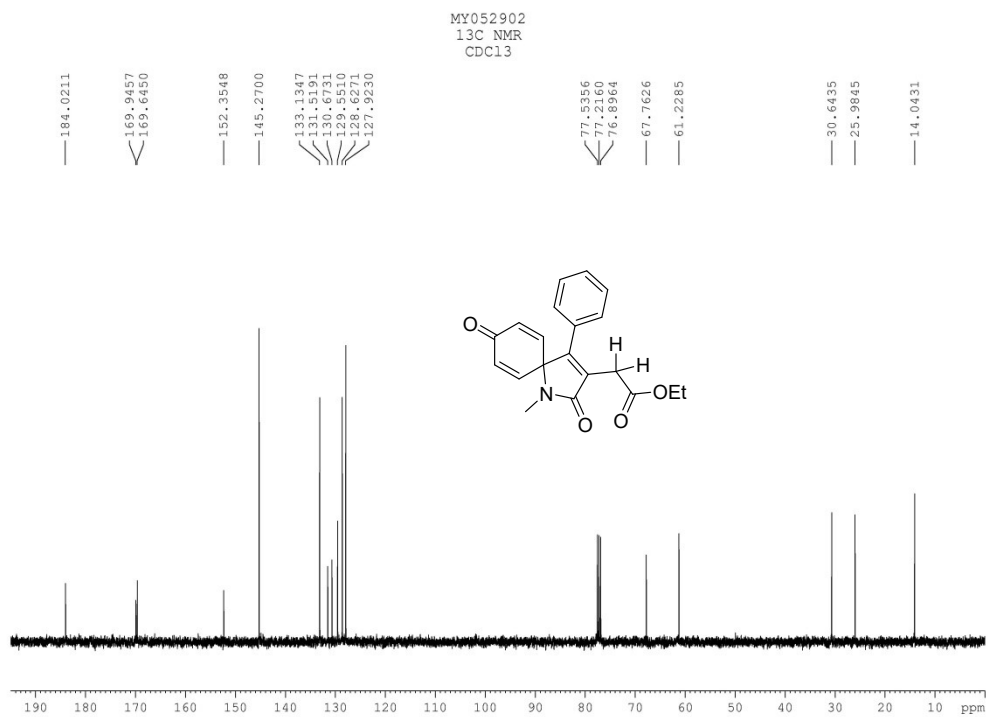

Fig. 87 <sup>13</sup>C NMR spectrum of compound 3ad

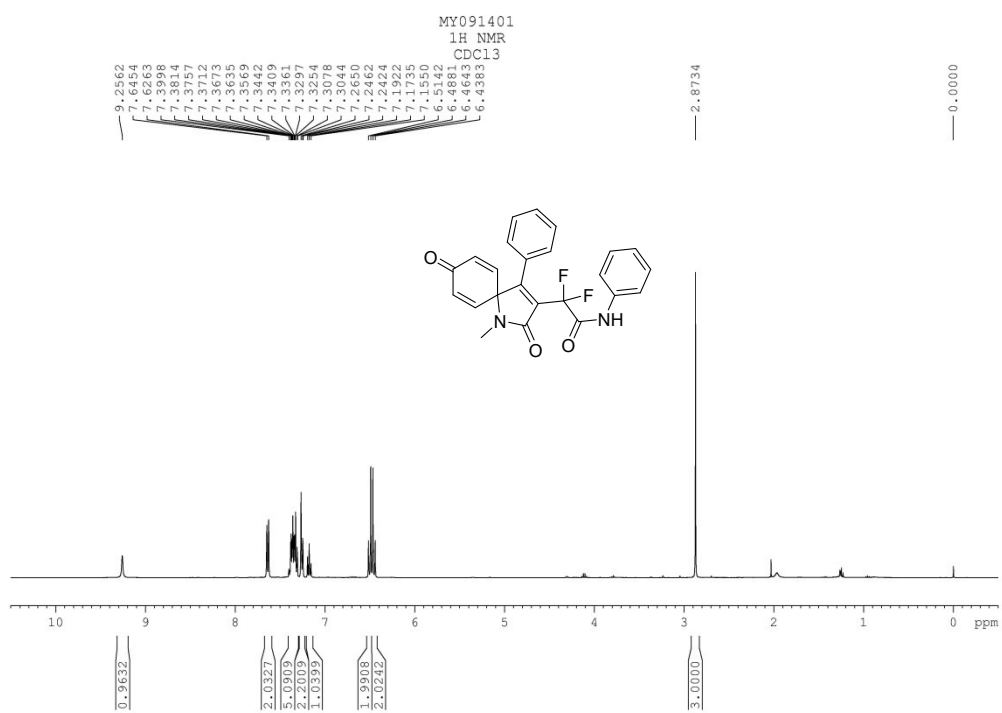

Fig. 88 <sup>1</sup>H NMR spectrum of compound 5a

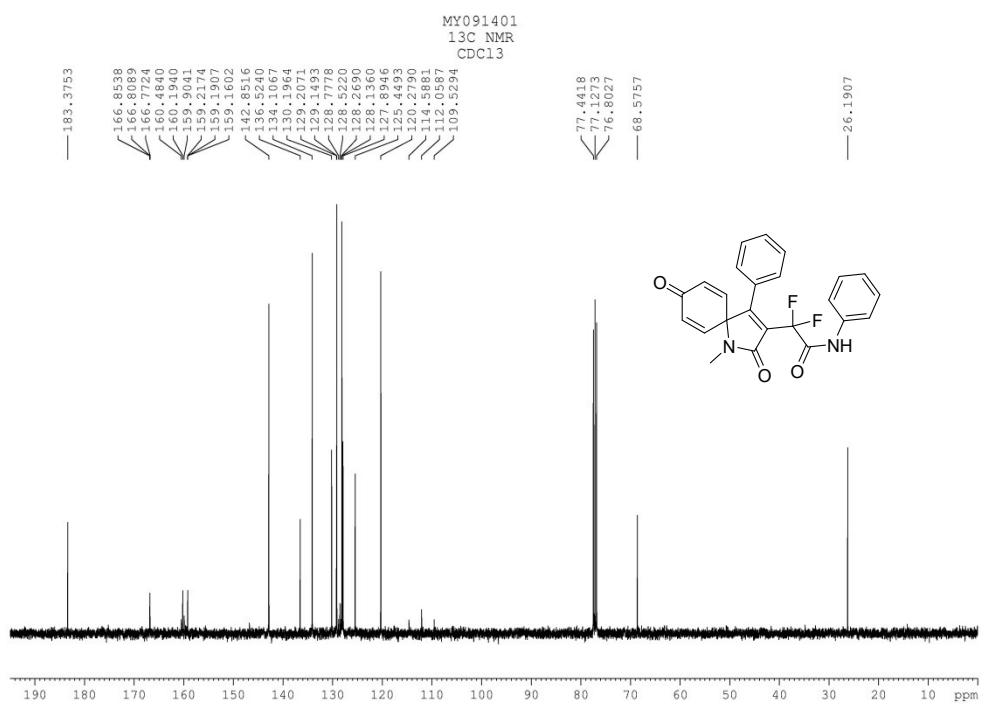

Fig. 89 <sup>13</sup>C NMR spectrum of compound 5a

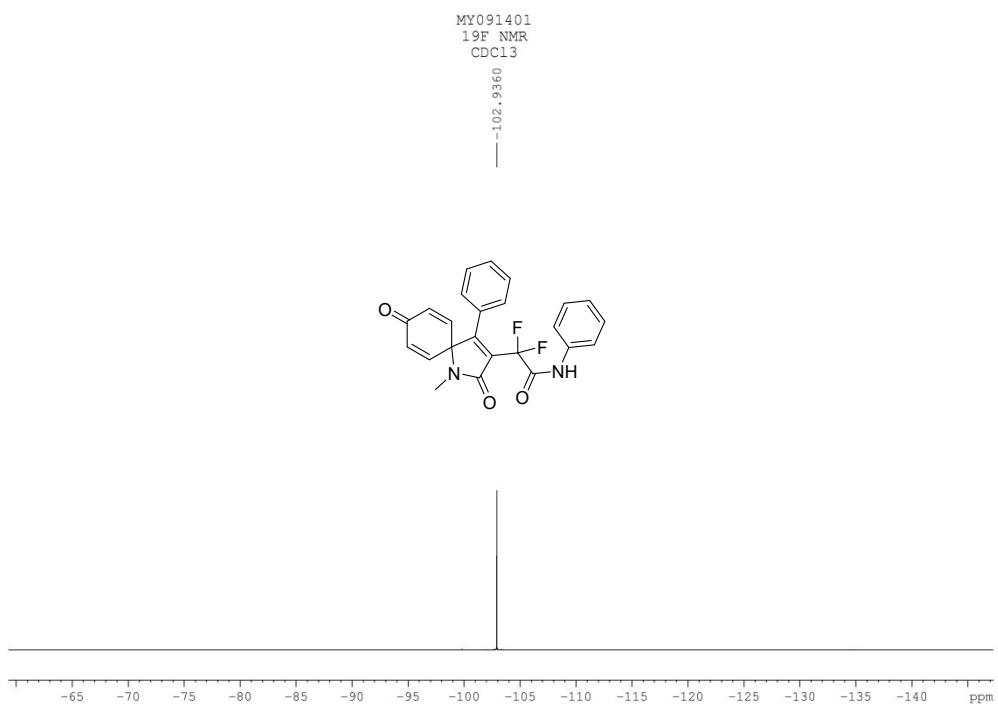

Fig. 90 <sup>19</sup>F NMR spectrum of compound 5a

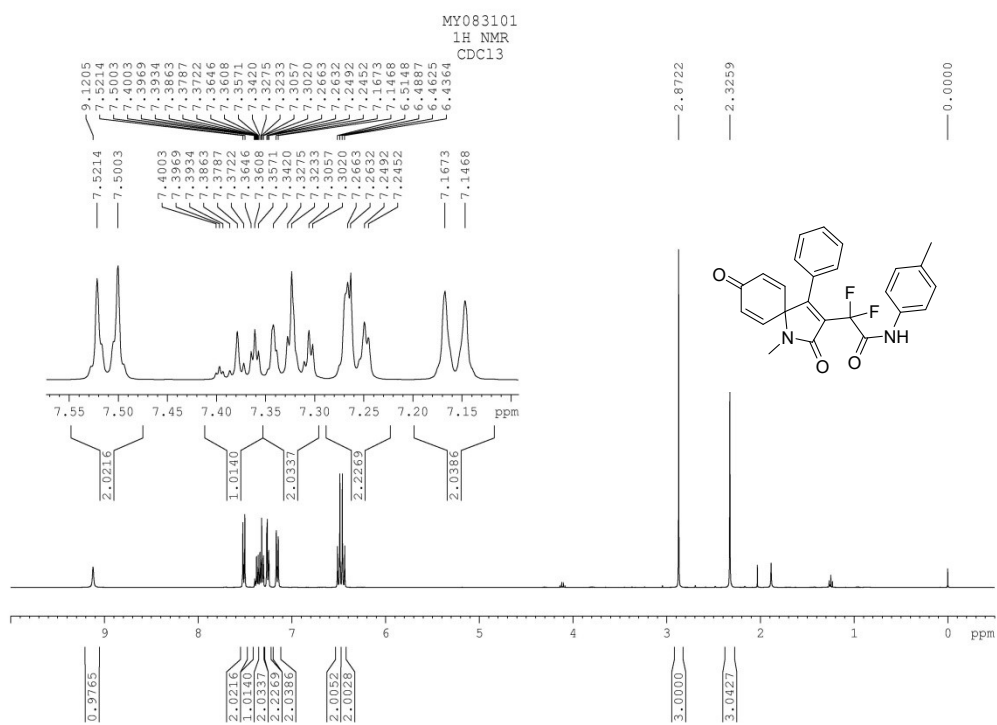

Fig. 91 <sup>1</sup>H NMR spectrum of compound 5b



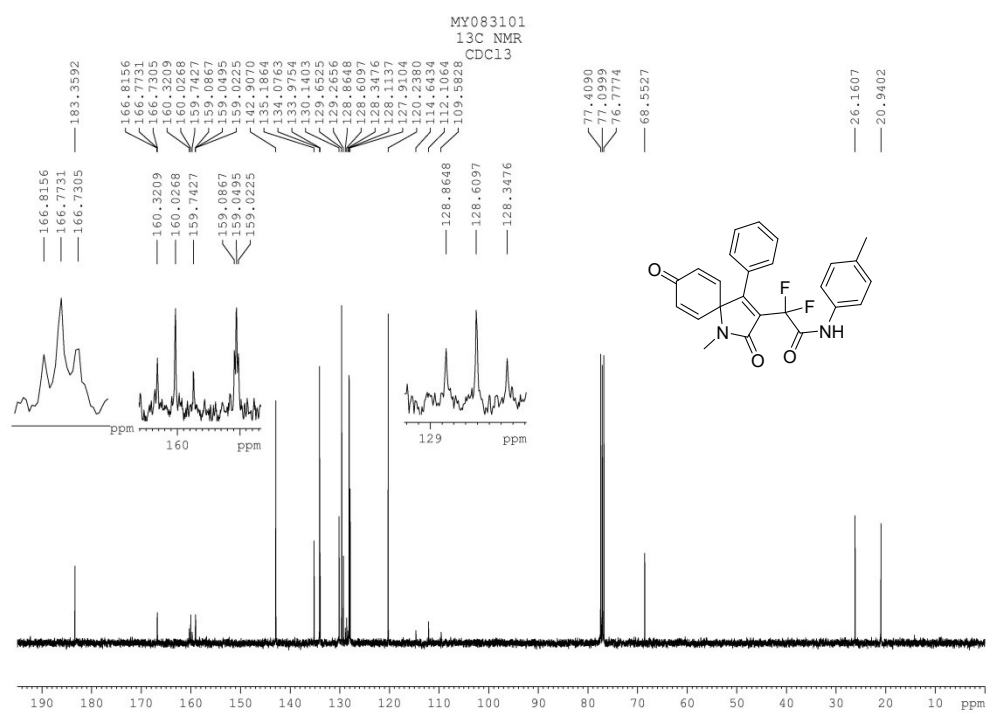

Fig. 92  $^{13}\text{C}$  NMR spectrum of compound 5b

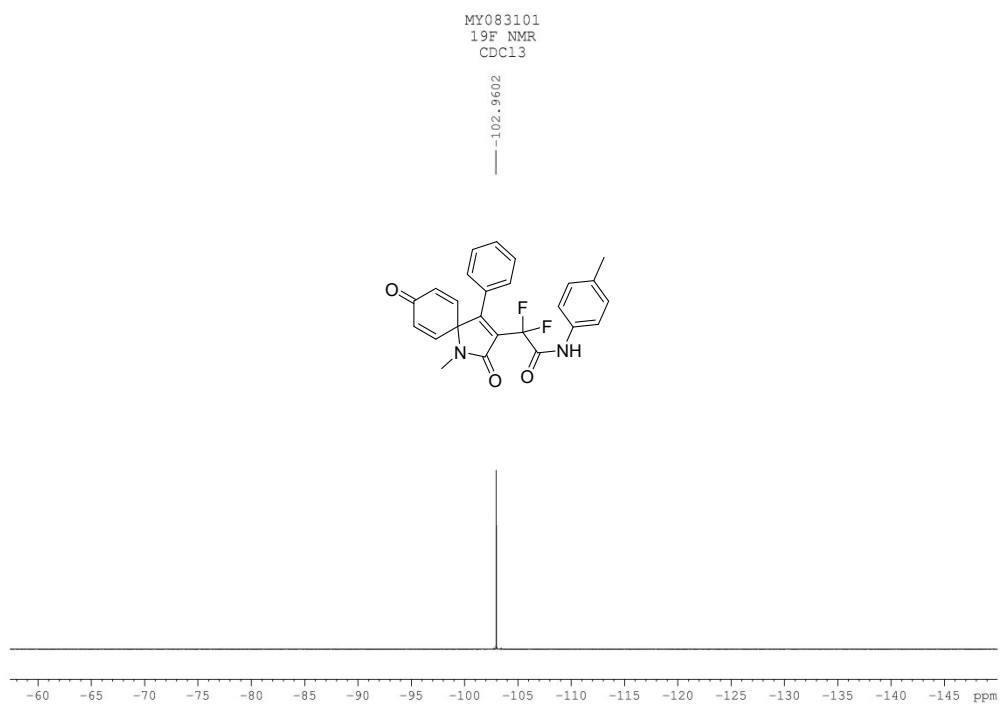

Fig. 93  $^{19}\text{F}$  NMR spectrum of compound 5b

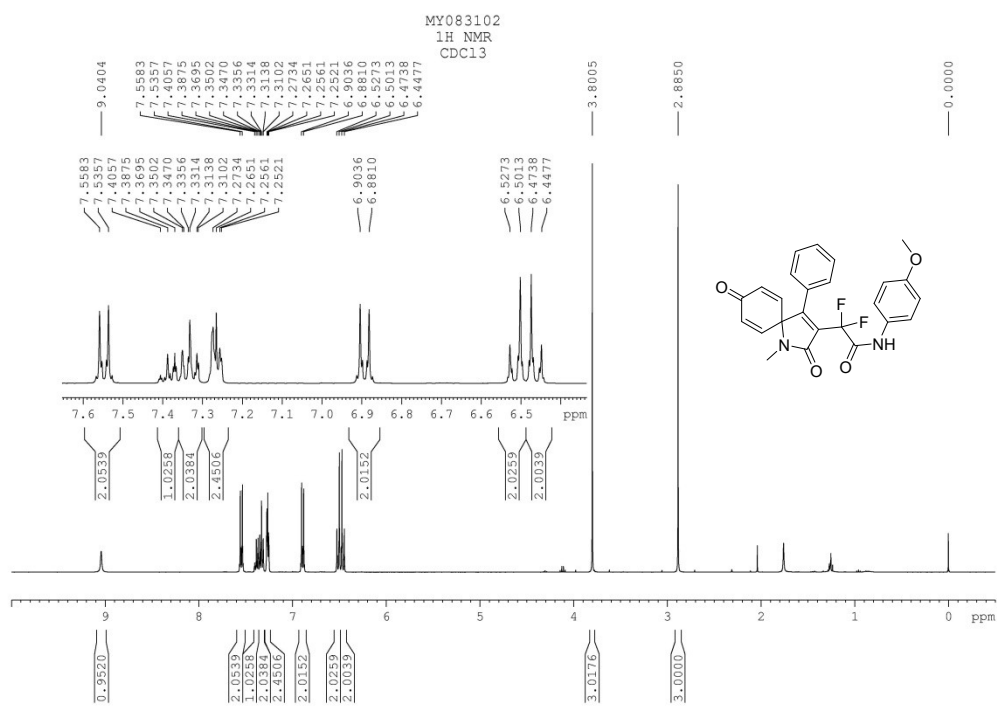

Fig. 94 <sup>1</sup>H NMR spectrum of compound 5c

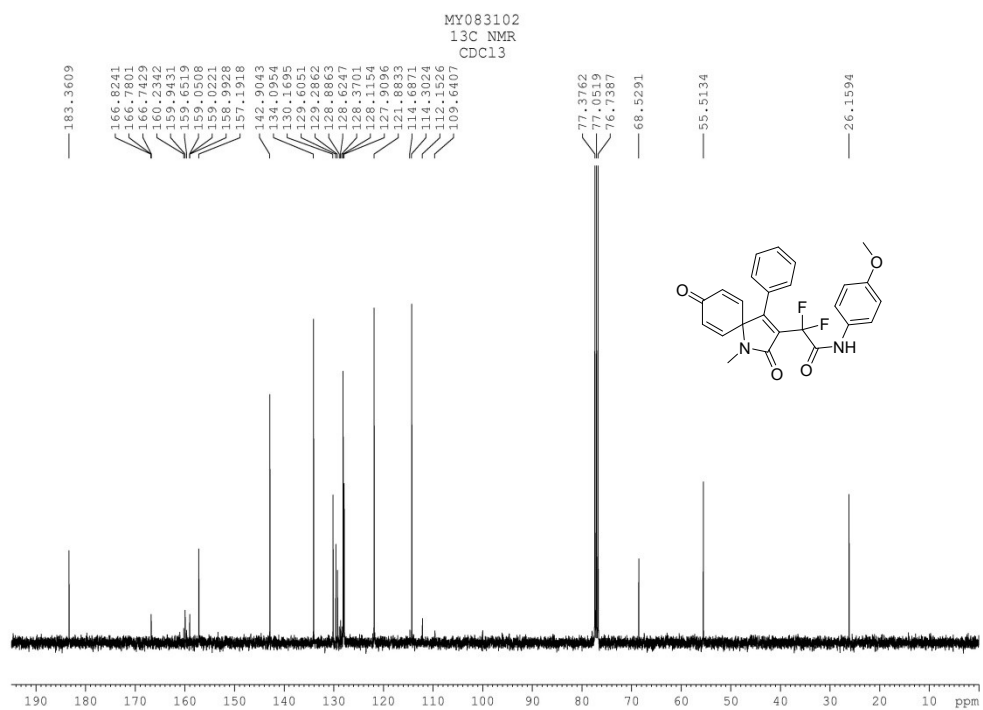

Fig. 95 <sup>13</sup>C NMR spectrum of compound 5c

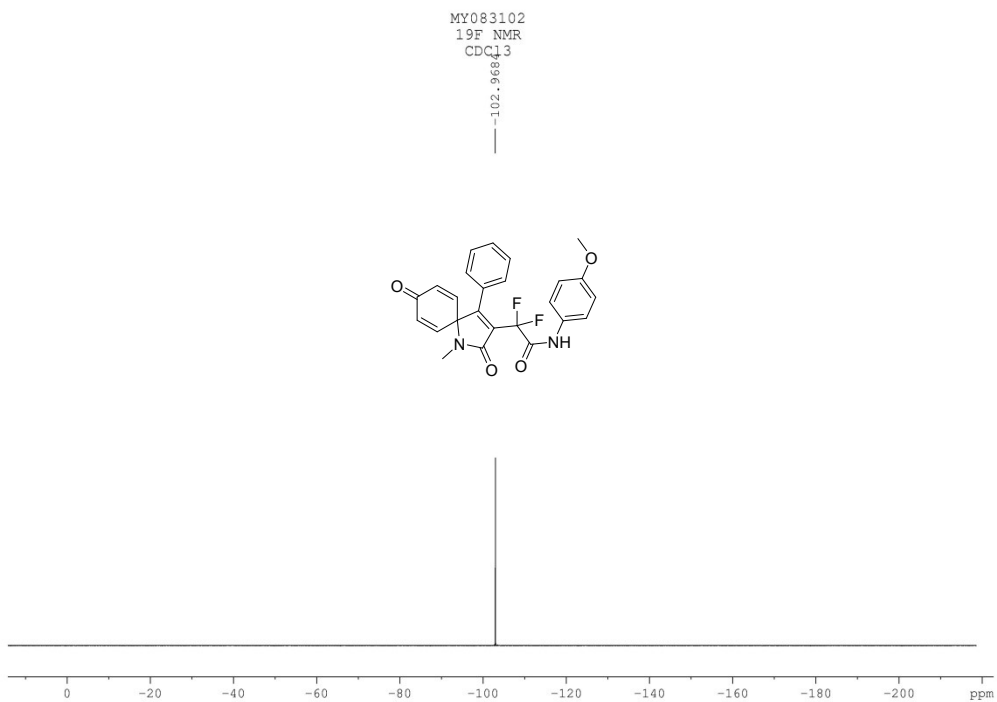

Fig. 96 <sup>19</sup>F NMR spectrum of compound 5c

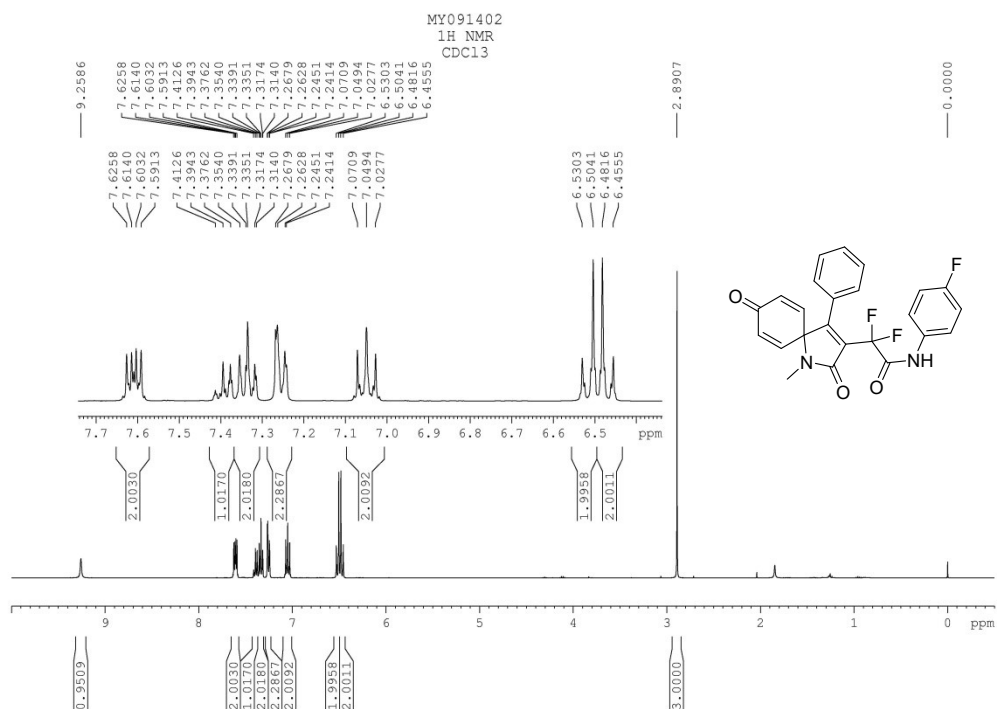

Fig. 97 <sup>1</sup>H NMR spectrum of compound 5d

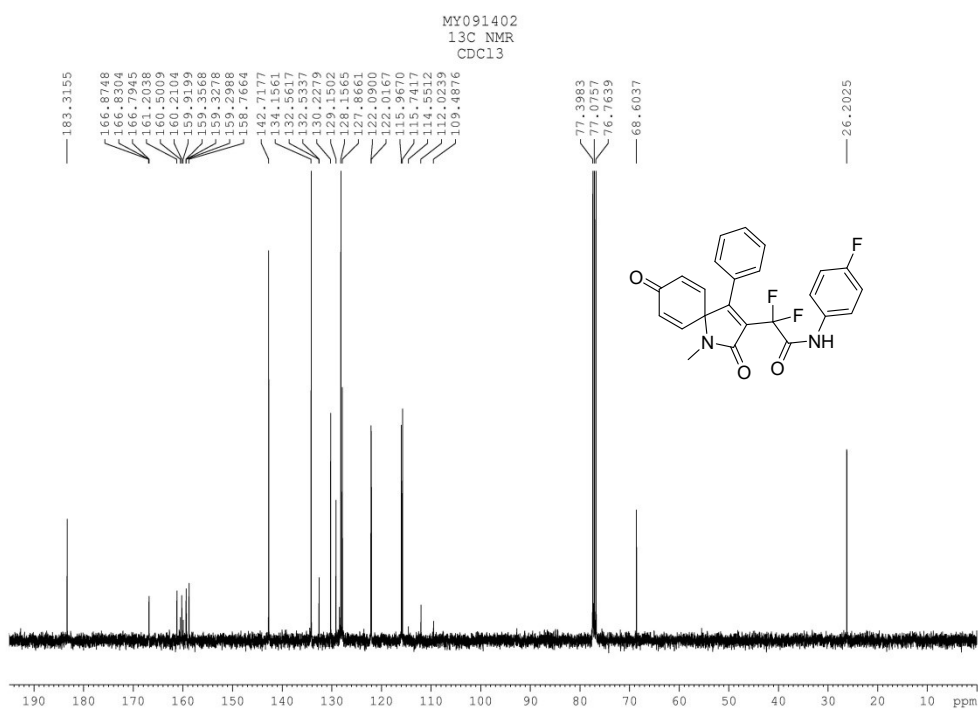

Fig. 98 <sup>13</sup>C NMR spectrum of compound 5d

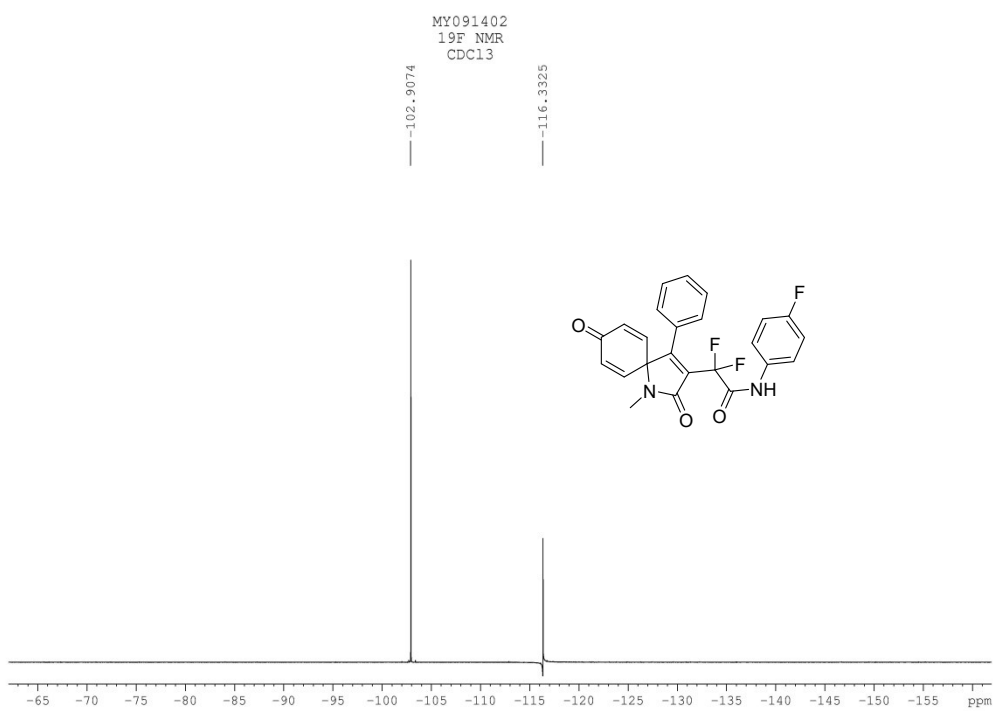

Fig. 99 <sup>19</sup>F NMR spectrum of compound 5d

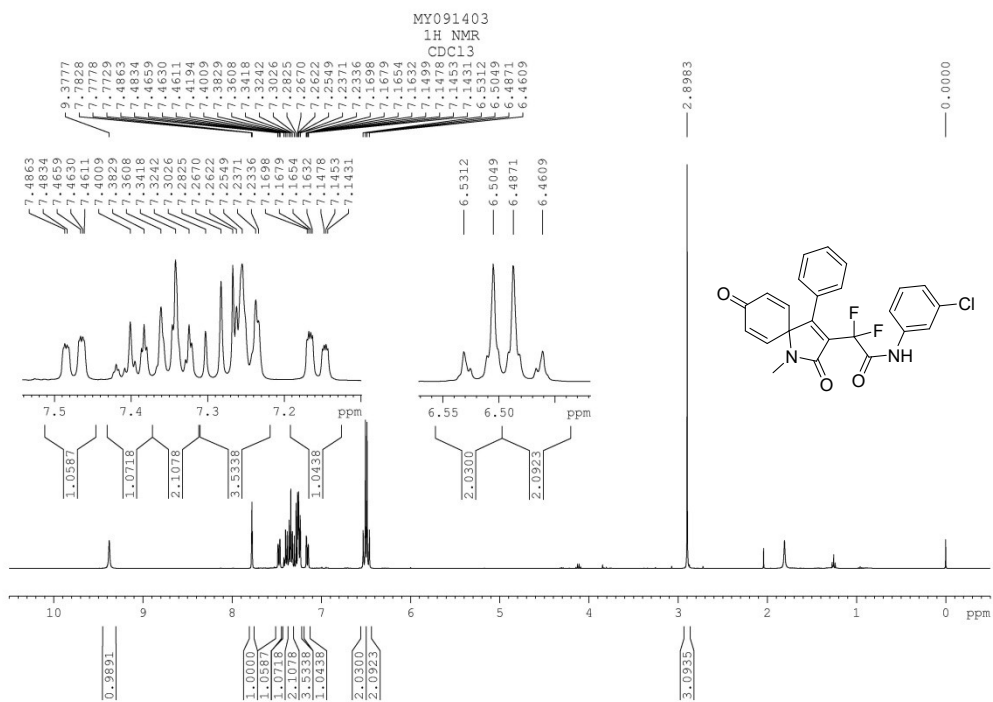

Fig. 100 <sup>1</sup>H NMR spectrum of compound 5e

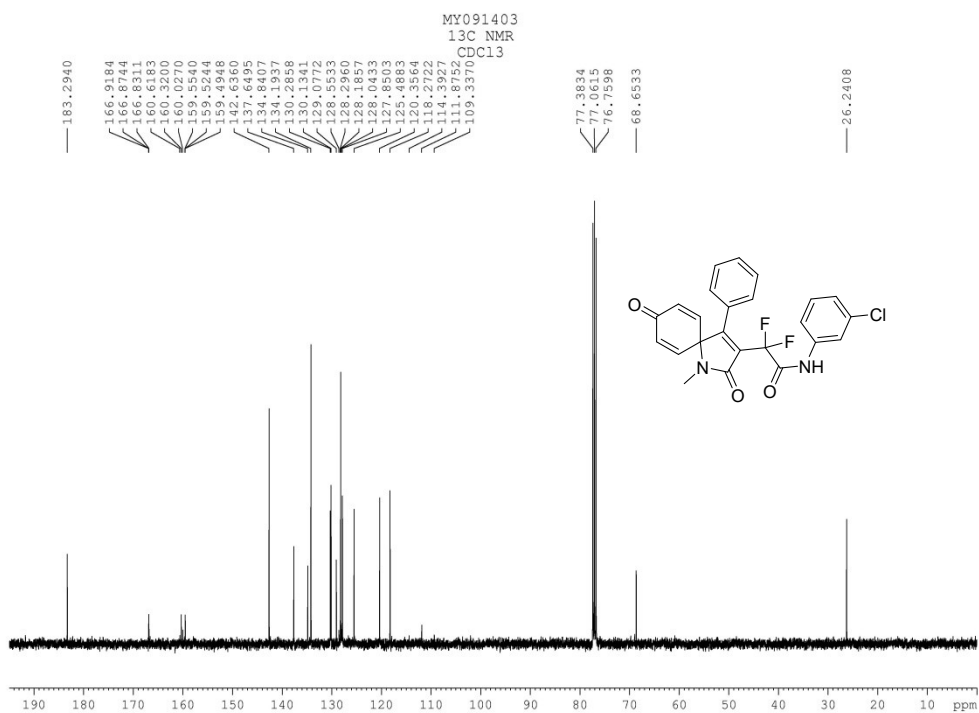

Fig. 101 <sup>13</sup>C NMR spectrum of compound 5e

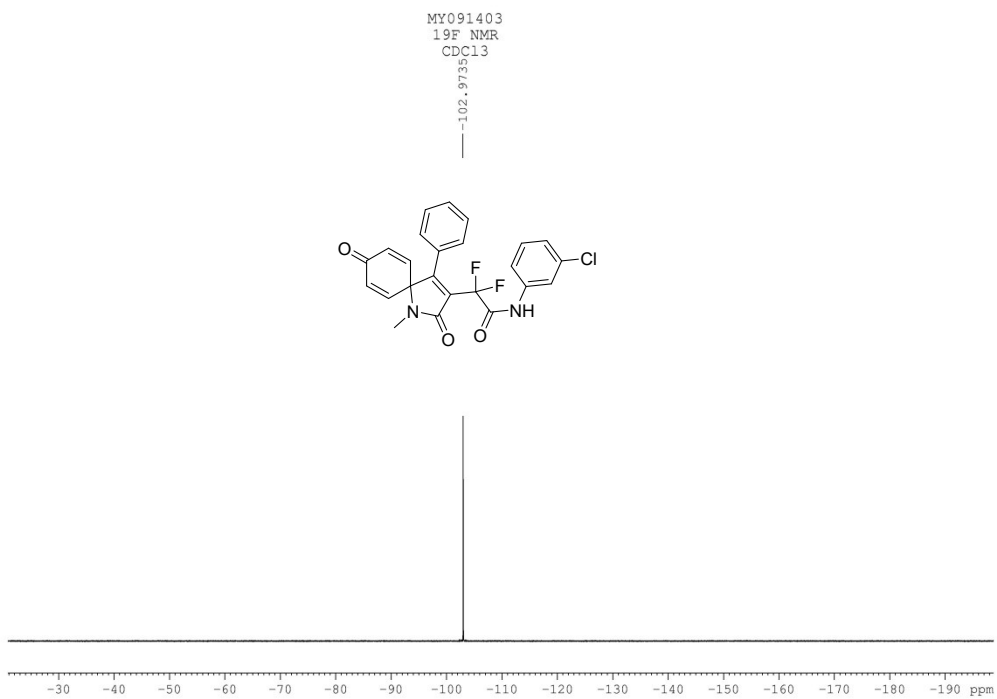

Fig. 102 <sup>19</sup>F NMR spectrum of compound 5e

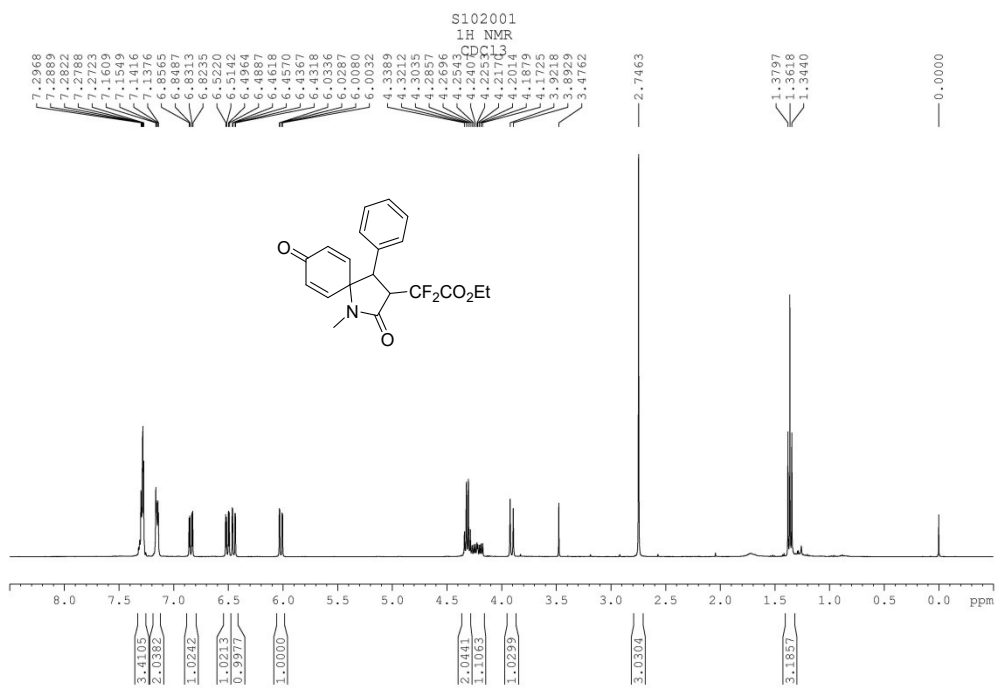

Fig. 103 <sup>1</sup>H NMR spectrum of compound 7

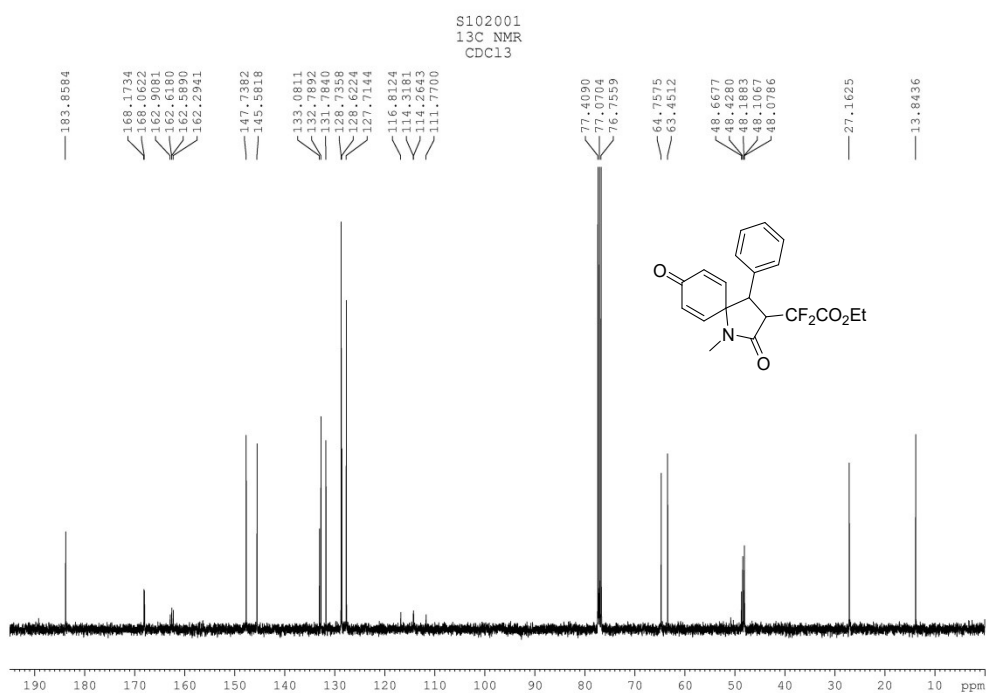

Fig. 104 <sup>13</sup>C NMR spectrum of compound 7

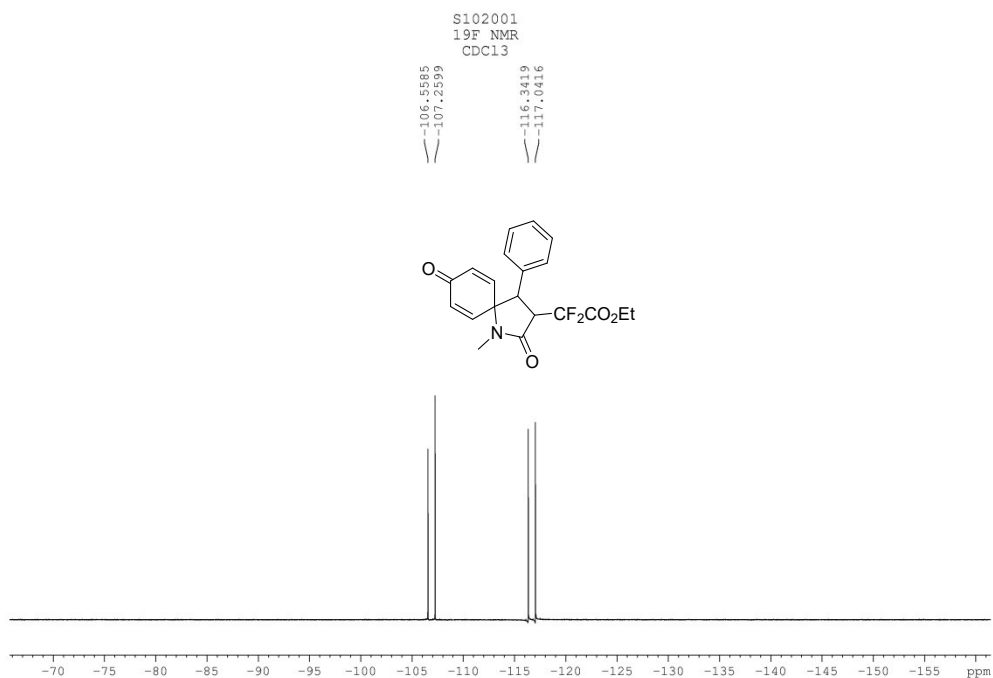

Fig. 105 <sup>19</sup>F NMR spectrum of compound 7

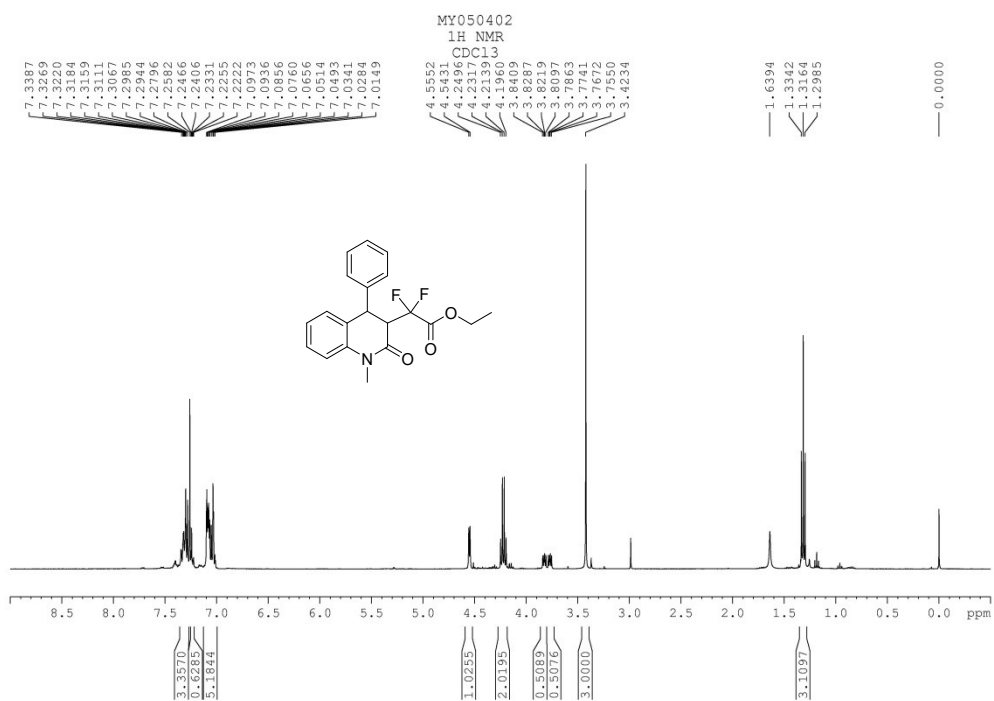

Fig. 106 <sup>1</sup>H NMR spectrum of compound 9

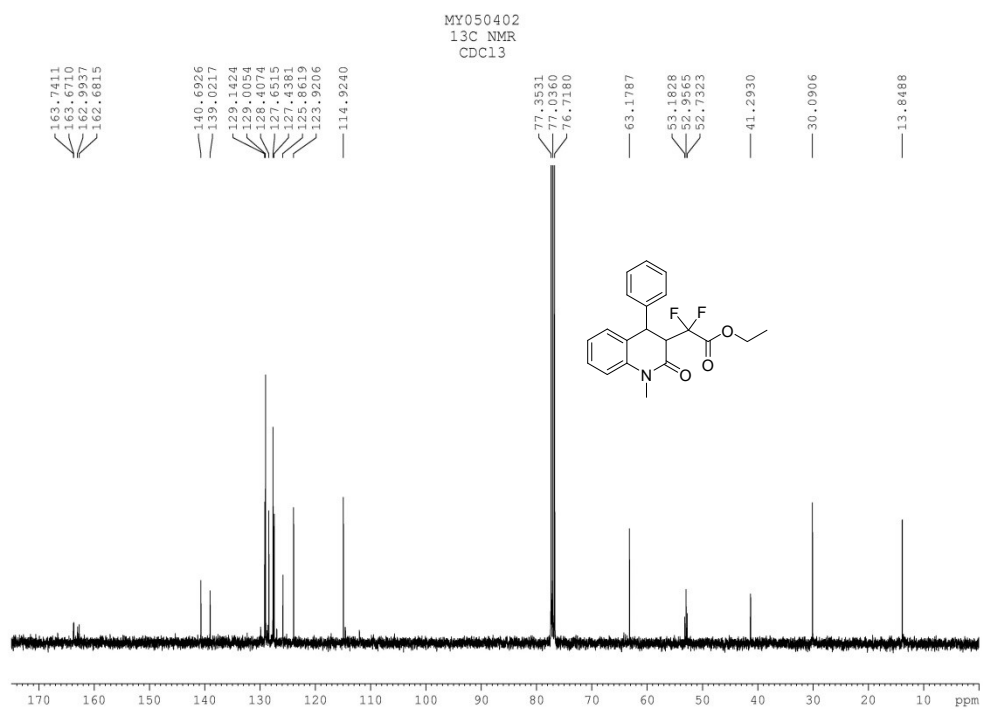

Fig. 107 <sup>13</sup>C NMR spectrum of compound 9



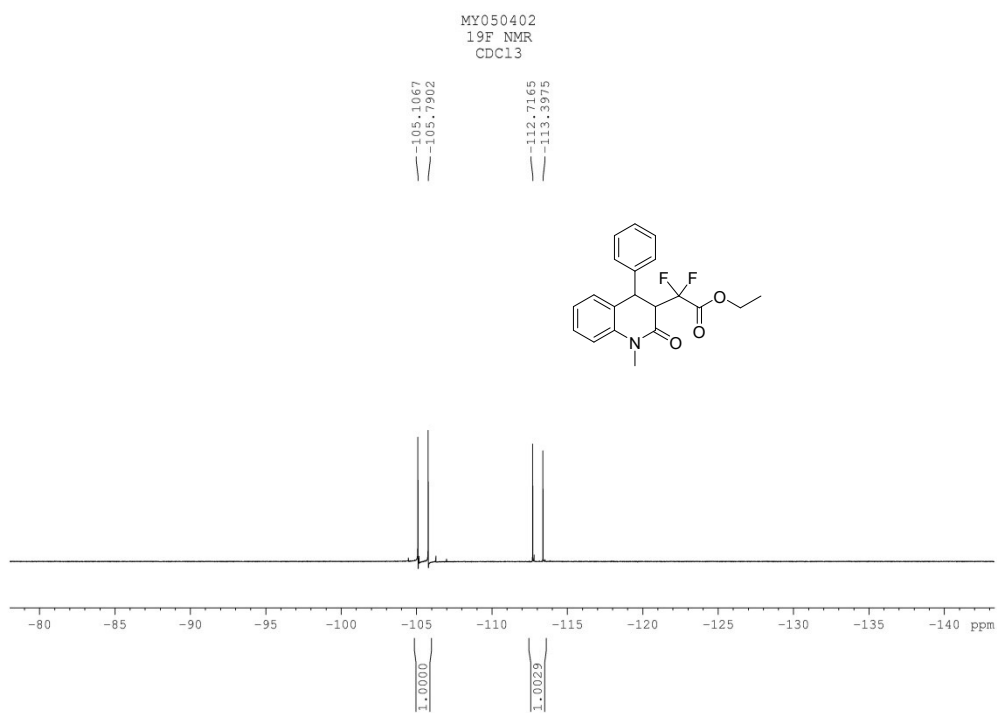

Fig. 108 <sup>19</sup>F NMR spectrum of compound 9

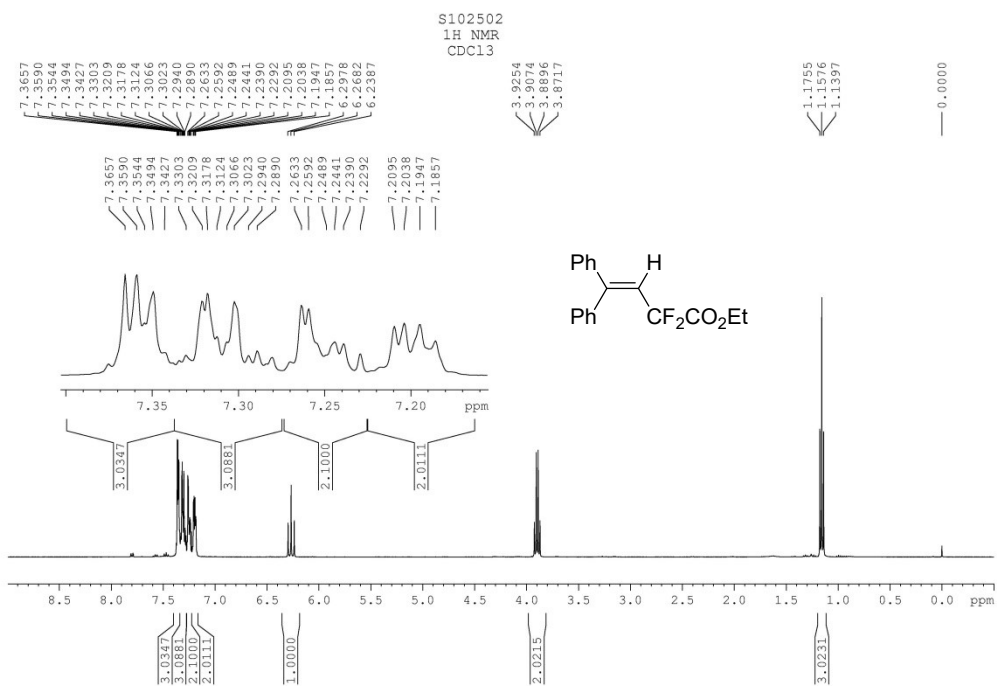

Fig. 109 <sup>1</sup>H NMR spectrum of compound 10

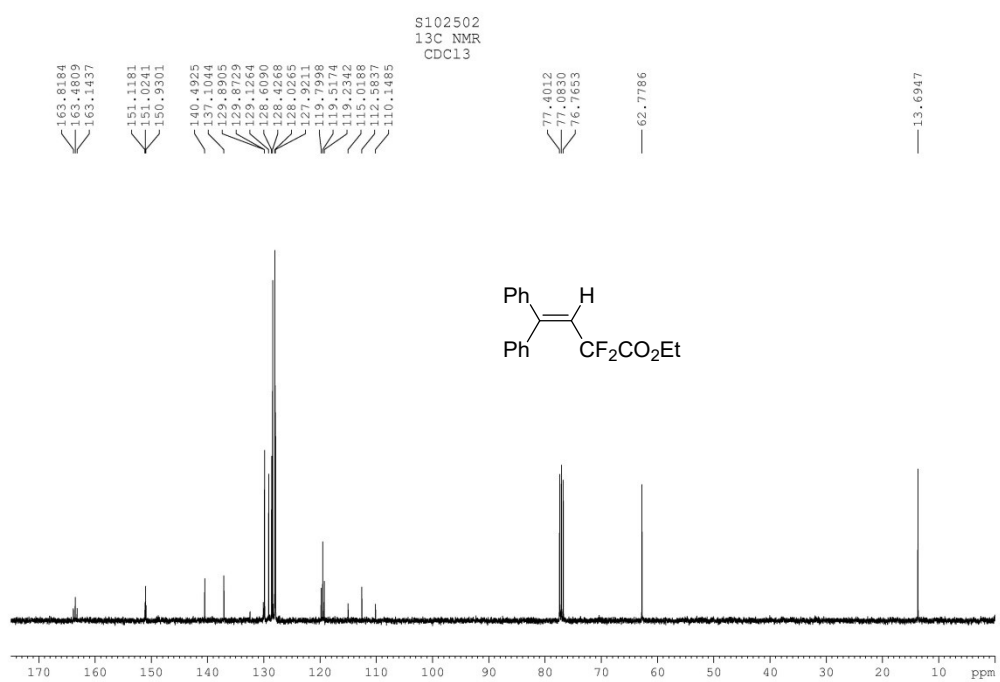

Fig. 110 <sup>13</sup>C NMR spectrum of compound 10

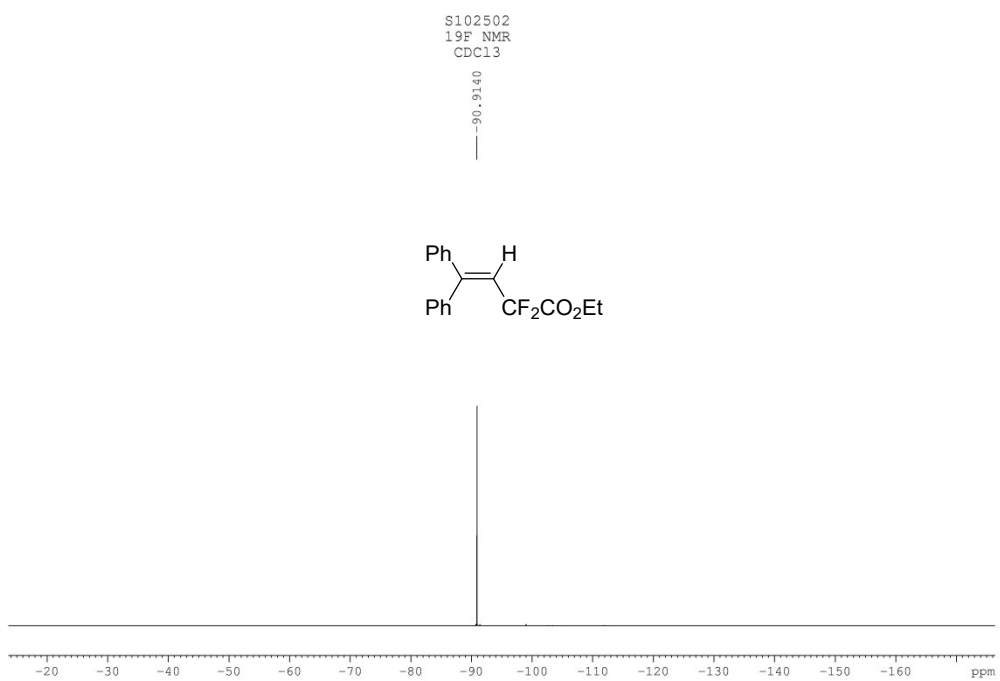

Fig. 111 <sup>19</sup>F NMR spectrum of compound 10

## 5 $^{19}\text{F}$ NMR spectrum of TEMPO- $\text{CF}_2\text{CO}_2\text{Et}$ adduct

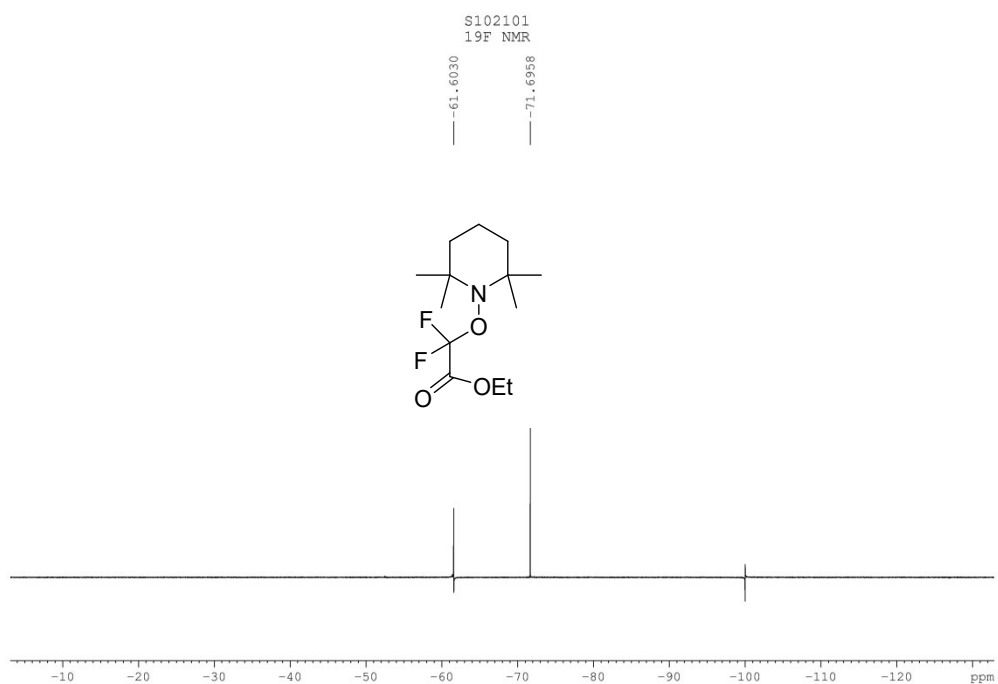

**Fig. 112**  $^{19}\text{F}$  NMR spectrum of TEMPO- $\text{CF}_2\text{CO}_2\text{Et}$  adduct

## 6 HR MS of BHT- $\text{CF}_2\text{CO}_2\text{Et}$ adduct

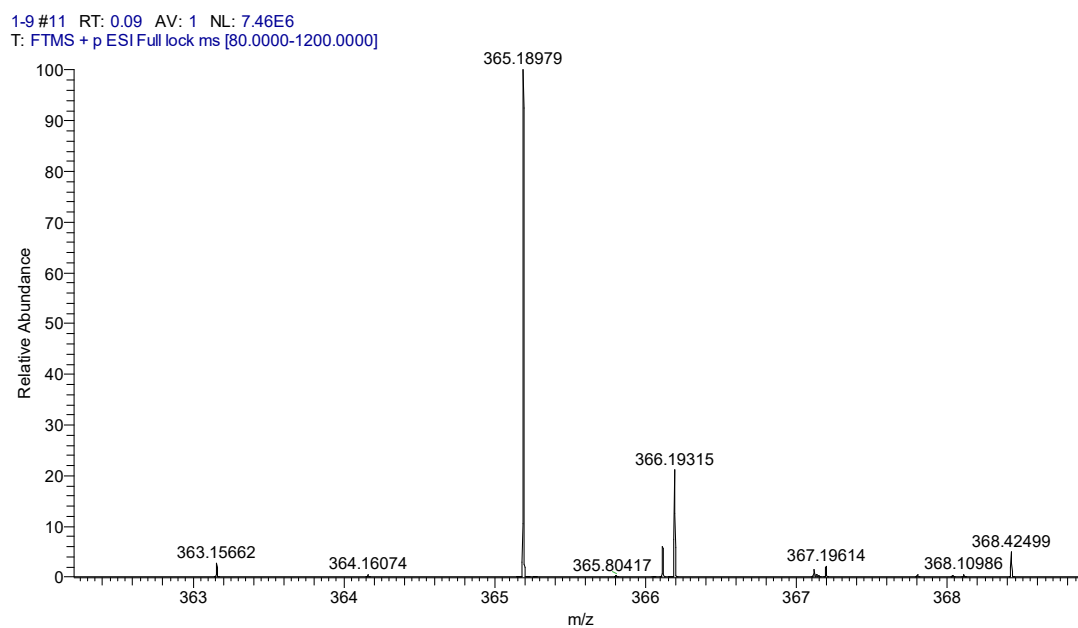

**Fig. 113** HR MS of BHT- $\text{CF}_2\text{CO}_2\text{Et}$  adduct
